# Supplementary material for: Is the reaction sequence in phosphine-catalyzed [8+2] cycloaddition controlled by electrophilicity?
Source: Royal Society of Chemistry journal article supplement (doi:10.1039/d0cc07370a), 2020-12-14
Supplement: d0cc07370a1.pdf [file d0cc07370a1.pdf]

## **Is the reaction sequence in phosphine-catalyzed [8+2] cycloaddition controlled by the electrophilicity?**

Wen-Xuan Lin,<sup>a</sup> Zhuolin Pei,<sup>a</sup> Cunxi Gong,<sup>a</sup> Huilin Mo,<sup>a</sup> Kai Yang,<sup>a</sup> Ling-Bo Qu,<sup>a</sup> Donghui Wei,<sup>a</sup> Jin-Shuai Song,<sup>\*a</sup> Shi-Jun Li,<sup>\*a</sup> and Yu Lan<sup>\*ab</sup>

<sup>a</sup> Green Catalysis Center, and College of Chemistry, Zhengzhou University, 100 Science Avenue, Zhengzhou, Henan, 450001, P. R. China

<sup>b</sup>School of Chemistry and Chemical Engineering, and Chongqing Key Laboratory of Theoretical and Computational Chemistry, Chongqing University, Chongqing 400030, P. R. China

## S1. Computational Details

All theoretical calculations in this study were performed in the Gaussian16 program package.<sup>1</sup>

All structures were optimized using M06-2X,<sup>2</sup> in conjunction with the 6-31G(d,p) basis set. The self-consistent reaction field (SCRF) polarizable continuum model (PCM)<sup>3</sup> was applied to simulate the solvent effect and toluene was employed as solvent. All the optimized stationary points had been identified as minima (zero imaginary frequencies) and transition states (one imaginary frequency), *via* the vibrational analysis. The solution-translational entropy correction has been calculated with THERMO program.<sup>4</sup> The entropy model has been successfully applied to typical cyclization reactions to predict activated entropy in solution. Furthermore, the single point energy at M06-2X/def2-TZVP<sup>5</sup>+PCM level has been also computed.

1. Frisch, M. J.; Trucks, G. W.; Schlegel, H. B.; Scuseria, G. E.; Robb, M. A.; Cheeseman, J. R.; Scalmani, G.; Barone, V.; Petersson, G. A.; Nakatsuji, H.; Li, X.; Caricato, M.; Marenich, A. V.; Bloino, J.; Janesko, B. G.; Gomperts, R.; Mennucci, B.; Hratchian, H. P.; Ortiz, J. V.; Izmaylov, A. F.; Sonnenberg, J. L.; Williams-Young, D.; Ding, F.; Lipparini, F.; Egidi, F.; Goings, J.; Peng, B.; Petrone, A.; Henderson, T.; Ranasinghe, D.; Zakrzewski, V. G.; Gao, J.; Rega, N.; Zheng, G.; Liang, W.; Hada, M.; Ehara, M.; Toyota, K.; Fukuda, R.; Hasegawa, J.; Ishida, M.; Nakajima, T.; Honda, Y.; Kitao, O.; Nakai, H.; Vreven, T.; Throssell, K.; Montgomery Jr., J. A.; Peralta, J. E.; Ogliaro, F.; Bearpark, M. J.; Heyd, J. J.; Brothers, E. N.; Kudin, K. N.; Staroverov, V. N.; Keith, T. A.; Kobayashi, R.; Normand, J.; Raghavachari, K.; Rendell, A. P.; Burant, J. C.; Iyengar, S. S.; Tomasi, J.; Cossi, M.; Millam, J. M.; Klene, M.; Adamo, C.; Cammi, R.; Ochterski, J. W.; Martin, R. L.; Morokuma, K.; Farkas, O.; Foresman, J. B.; Fox, D. J. *Gaussian16*, Gaussian, Inc., Wallingford, CT, **2016**.
2. Zhao, Y.; and Truhlar, D.G. "The M06 suite of density functionals for main group thermochemistry, thermochemical kinetics, noncovalent interactions, excited states, and transition elements: two new functionals and systematic testing of four M06-class functionals and 12 other functionals," *Theor. Chem. Acc.*, 120 (2008) 215-41. DOI: 10.1007/s00214-007-0310-x
3. Scalmani, G.; Frisch, M. J. Continuous Surface Charge Polarizable Continuum Models of Solvation. I. General formalism, *J. Chem. Phys.* **2010**, 132, 114110-24.
4. Fang, D.-C. THERMO; Beijing Normal University, Beijing, People's Republic of China, 2013.
5. Weigend F.; Ahlrichs, R. "Balanced basis sets of split valence, triple zeta valence and quadruple zeta valence quality for H to Rn: Design and assessment of accuracy," *Phys. Chem. Chem.*

Phys., 2005, 7, 3297-305.

S2. The electrophilicity of some structures in the calculation at M062X/6-31G(d, p) level.

| Species        | R1     | R2     | R2a    | R2c    | R2b    | R2d    | M1     |
|----------------|--------|--------|--------|--------|--------|--------|--------|
| E <sup>H</sup> | -0.289 | -0.268 | -0.269 | -0.235 | -0.237 | -0.275 | -0.194 |
| E <sup>L</sup> | 0.003  | -0.059 | -0.066 | -0.024 | -0.041 | -0.034 | 0.010  |
| ω              | 0.947  | 1.739  | 1.886  | 1.085  | 1.341  | 1.349  | 0.562  |

S3. The calculation of phosphine catalyzed reaction of R2a and R1.

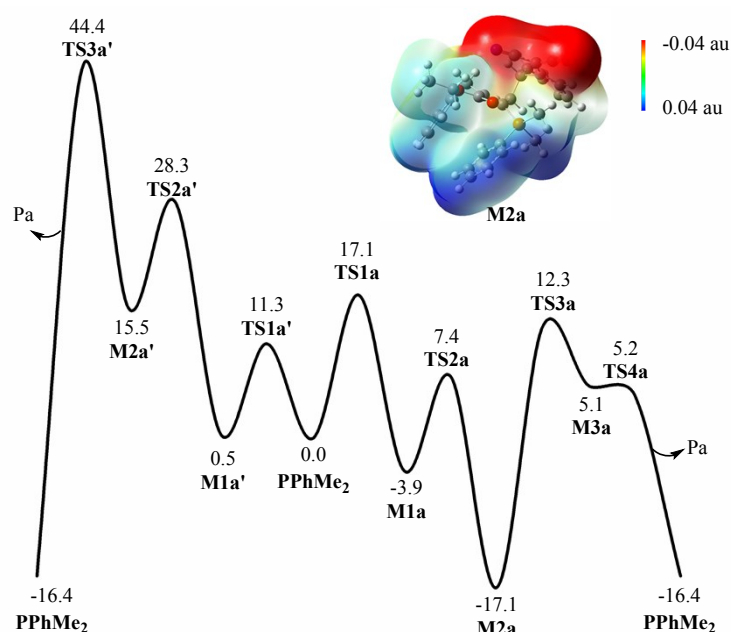

Scheme S1. The energy profile for the phosphine-catalyzed cycloaddition of R1 and R2a; the ESP map of M2a.

For the phosphine-catalyzed reaction between R1 and R2a, the rate-determined step would be the ring closure step, which the free energy barrier was calculated to be 30.4 kcal/mol. The ESP map clearly shows the cyano group could stabilize the intermediate M2a, leading to the free energy of stepwise cycloaddition increasing.

S4. The energy and free energy for the calculations of R1 and R2.

| Species                  | E(au)            | G(au)            | E(au)          | G(au)        |
|--------------------------|------------------|------------------|----------------|--------------|
|                          | M062X/6-31G(d,p) | M062X/6-31G(d,p) | M062X/def2tzvp |              |
| <b>R1</b>                | -653.95415       | -653.74687       | -654.19176     | -653.98448   |
| <b>R2</b>                | -837.46751       | -837.26456       | -837.77746     | -837.57451   |
| <b>PPhMe<sub>2</sub></b> | -652.65392       | -652.51064       | -652.79169     | -652.64841   |
| <b>TS1</b>               | -1306.60006      | -1306.23356      | -1306.97215    | -1306.60565  |
| <b>TS1-a</b>             | -1306.59367      | -1306.22857      | -1306.967274   | -1306.602174 |
| <b>TS1-b</b>             | -1306.594        | -1306.22776      | -1306.968711   | -1306.602471 |
| <b>M1</b>                | -1306.63048      | -1306.26148      | -1307.00811    | -1306.63911  |

|               |             |             |              |              |
|---------------|-------------|-------------|--------------|--------------|
| <b>M1-a</b>   | -1306.62342 | -1306.25366 | -1307.001181 | -1306.631421 |
| <b>M1-b</b>   | -1306.61226 | -1306.24432 | -1306.99226  | -1306.62432  |
| <b>TS2</b>    | -2144.10765 | -2143.51598 | -2144.7855   | -2144.19383  |
| <b>M2</b>     | -2144.13936 | -2143.54249 | -2144.81647  | -2144.2196   |
| <b>TS3</b>    | -2144.12138 | -2143.52293 | -2144.79457  | -2144.19612  |
| <b>M3</b>     | -2144.13115 | -2143.53887 | -2144.80102  | -2144.20874  |
| <b>TS4</b>    | -2144.13115 | -2143.53416 | -2144.80097  | -2144.20398  |
| <b>P</b>      | -1491.50578 | -1491.07041 | -1492.04289  | -1491.60752  |
| <b>TS1'</b>   | -1490.11896 | -1489.76045 | -1490.56494  | -1490.20643  |
| <b>TS1'-a</b> | -1490.11996 | -1489.75845 | -1490.56581  | -1490.20430  |
| <b>M1'</b>    | -1490.14639 | -1489.78248 | -1490.59725  | -1490.23334  |
| <b>M1'-a</b>  | -1490.14243 | -1489.77832 | -1490.593712 | -1490.229602 |
| <b>TS2'</b>   | -2144.08316 | -2143.49204 | -2144.76099  | -2144.16987  |
| <b>M2'</b>    | -2144.09432 | -2143.50028 | -2144.77167  | -2144.17763  |
| <b>TS3'</b>   | -2144.05693 | -2143.46640 | -2144.7316   | -2144.14107  |
| <b>TS3''</b>  | -2144.02552 | -2143.43431 | -2144.704413 | -2144.113203 |

S5. The energy and free energy for the calculations of different R2s.

| Species      | E(au)<br>M062X/6-31G(d,p) | G(au)<br>M062X/6-31G(d,p) | E(au)<br>M062X/def2tzvp | G(au)        |
|--------------|---------------------------|---------------------------|-------------------------|--------------|
| <b>R2a</b>   | -493.9028                 | -493.79588                | -494.0799               | -493.97298   |
| <b>TS2a</b>  | -1800.53561               | -1800.04408               | -1801.085581            | -1800.594051 |
| <b>M2a</b>   | -1800.58499               | -1800.08689               | -1801.13238             | -1800.63428  |
| <b>TS3a</b>  | -1800.54385               | -1800.04689               | -1801.09733             | -1800.58634  |
| <b>M3a</b>   | -1800.55128               | -1800.05262               | -1801.094422            | -1800.59576  |
| <b>TS4a</b>  | -1800.55359               | -1800.05619               | -1801.09498             | -1800.59758  |
| <b>M3a</b>   | -1800.54486               | -1800.04473               | -1801.087920            | -1800.58779  |
| <b>Pa</b>    | -1147.91546               | -1147.57902               | -1148.320073            | -1147.983633 |
| <b>TS1a'</b> | -1146.55105               | -1146.28827               | -1146.86619             | -1146.60341  |
| <b>M1a'</b>  | -1146.56748               | -1146.30138               | -1146.886727            | -1146.620627 |
| <b>TS2a'</b> | -1800.50179               | -1800.01135               | -1801.05126             | -1800.56082  |
| <b>M2a'</b>  | -1800.5285                | -1800.03319               | -1801.07653             | -1800.58122  |
| <b>TS3a'</b> | -1800.4805                | -1799.99060               | -1801.02498             | -1800.53508  |
| <b>R2b</b>   | -388.05789                | -387.89290                | -388.189257             | -388.024267  |
| <b>TS2b</b>  | -1694.67095               | -1694.11904               | -1695.173974            | -1694.622064 |
| <b>M2b</b>   | -1694.67812               | -1694.12521               | -1695.18135             | -1694.62844  |
| <b>TS1b'</b> | -1040.68758               | -1040.36452               | -1040.95829             | -1040.63523  |
| <b>M1b'</b>  | -1040.69217               | -1040.36797               | -1040.96592             | -1040.64172  |
| <b>TS2b'</b> | -1694.63868               | -1694.09074               | -1695.17397             | -1694.62603  |
| <b>M2b'</b>  | -1694.67843               | -1694.1246                | -1695.18135             | -1694.62752  |
| <b>TS3b'</b> | -1694.64748               | -1694.09794               | -1695.146019            | -1694.596479 |
| <b>R2c</b>   | -309.46368                | -309.3501                 | -309.57126              | -309.45768   |
| <b>TS2c</b>  | -1616.0802                | -1615.58176               | -1616.56005             | -1616.06161  |

|              |             |             |              |              |
|--------------|-------------|-------------|--------------|--------------|
| <b>M2c</b>   | -1616.11777 | -1615.61454 | -1616.59678  | -1616.09355  |
| <b>TS1c'</b> | -962.09233  | -961.82295  | -962.34007   | -962.07069   |
| <b>M1c'</b>  | -962.09786  | -961.82742  | -962.34907   | -962.07863   |
| <b>TS2c'</b> | -1616.04297 | -1615.55023 | -1616.52705  | -1616.03431  |
| <b>M2c'</b>  | -1616.11777 | -1615.61454 | -1616.59651  | -1616.09328  |
| <b>TS3c'</b> | -1616.08345 | -1615.58292 | -1616.55829  | -1616.05776  |
| <b>R2d</b>   | -983.33141  | -983.21512  | -983.74521   | -983.62892   |
| <b>TS2d</b>  | -2289.96106 | -2289.45814 | -2290.74308  | -2290.24016  |
| <b>M2d</b>   | -2289.99738 | -2289.49042 | -2290.779    | -2290.27204  |
| <b>TS1d'</b> | -1635.97361 | -1635.7008  | -1636.523    | -1636.25019  |
| <b>M1d'</b>  | -1635.98868 | -1635.71373 | -1636.54368  | -1636.26873  |
| <b>TS2d'</b> | -2289.93399 | -2289.43345 | -2290.71305  | -2290.21251  |
| <b>M2d'</b>  | -2289.9567  | -2289.45115 | -2290.73158  | -2290.22603  |
| <b>TS3d'</b> | -2289.92235 | -2289.42009 | -2290.694789 | -2290.192529 |

S6. The possible resonance structures of R2

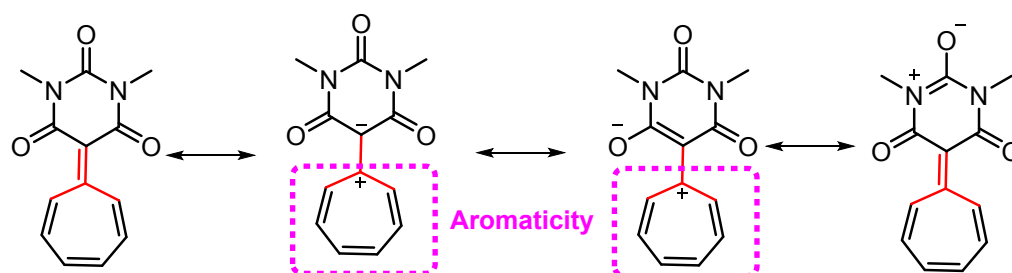

Scheme S6. The possible resonance structures of R2

S7. The energy and free energy for the calculations of R2 and methanol.

| Species           | E(au)<br>M062X/6-<br>31G(d,p) | G(au)<br>M062X/6-<br>31G(d,p) | E(au)<br>M062X/def2tzvp | G(au)        |
|-------------------|-------------------------------|-------------------------------|-------------------------|--------------|
| <b>MeOH</b>       | -115.66575                    | -115.62825                    | -115.71761              | -115.68010   |
| <b>R1-sol</b>     | -953.14742                    | -952.8928                     | -953.50506              | -953.25044   |
| <b>R1-sol-1</b>   | -953.14685                    | -952.89408                    | -953.50438              | -953.25161   |
| <b>R1-2sol</b>    | -1068.82587                   | -1068.52488                   | -1069.231716            | -1068.930726 |
| <b>R1-2sol-1</b>  | -1068.82803                   | -1068.52322                   | -1069.233707            | -1068.928897 |
| <b>R1-3sol</b>    | -1184.50787                   | -1184.15216                   | -1184.961523            | -1184.605813 |
| <b>M1'-sol</b>    | -1605.82755                   | -1605.41428                   | -1606.325877            | -1605.91261  |
| <b>M1'-sol-1</b>  | -1605.83103                   | -1605.41791                   | -1606.329015            | -1605.91589  |
| <b>M1'-sol-2</b>  | -1605.83081                   | -1605.41771                   | -1606.328772            | -1605.91567  |
| <b>M1'-2sol</b>   | -1721.51728                   | -1721.05323                   | -1722.061912            | -1721.59786  |
| <b>M1'-2sol-1</b> | -1721.5152                    | -1721.05049                   | -1722.06054             | -1721.59586  |
| <b>M1'-2sol-2</b> | -1721.51922                   | -1721.05529                   | -1722.063982            | -1721.600052 |
| <b>M1'-3sol</b>   | -1837.20177                   | -1836.68891                   | -1837.796671            | -1837.283811 |



## S8. The Coordination.

|                                                                                     |  |                                                                                      |
|-------------------------------------------------------------------------------------|--|--------------------------------------------------------------------------------------|
| <b>R1</b>                                                                           |  | <b>R2a</b>                                                                           |
| 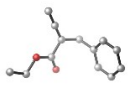   |  |    |
| C -1.50945 3.17196 0.46145                                                          |  | C -3.02142 0.67880 0.00015                                                           |
| C -1.05444 2.08070 -0.08383                                                         |  | C -3.02142 -0.67885 -0.00005                                                         |
| H -1.27023 3.42389 1.49040                                                          |  | C -1.88464 -1.55081 -0.00012                                                         |
| H -2.14897 3.85070 -0.09513                                                         |  | C -1.88463 1.55075 0.00016                                                           |
| C -0.57682 0.99739 -0.65171                                                         |  | C -0.55487 -1.27193 -0.00006                                                         |
| C 0.75510 0.95580 -1.37614                                                          |  | C -0.55487 1.27184 0.00002                                                           |
| H 0.61624 0.41657 -2.31748                                                          |  | C 0.13217 -0.00004 -0.00017                                                          |
| H 1.06021 1.97906 -1.60803                                                          |  | H -3.98793 -1.17420 -0.00019                                                         |
| C 1.82061 0.27152 -0.54437                                                          |  | H -2.12790 -2.61006 -0.00017                                                         |
| C 2.48816 0.98112 0.45732                                                           |  | H 0.10108 -2.13811 -0.00004                                                          |
| C 2.13264 -1.07420 -0.74207                                                         |  | H -2.12786 2.61001 0.00025                                                           |
| C 3.45642 0.36144 1.24065                                                           |  | H -3.98793 1.17416 0.00020                                                           |
| H 2.24410 2.02856 0.62024                                                           |  | H 0.10113 2.13800 0.00003                                                            |
| C 3.10103 -1.69725 0.04153                                                          |  | C 1.52327 -0.00002 -0.00020                                                          |
| H 1.60123 -1.63183 -1.50705                                                         |  | C 2.27839 -1.21077 -0.00001                                                          |
| C 3.76627 -0.98150 1.03330                                                          |  | N 2.87789 -2.20366 0.00031                                                           |
| H 3.97154 0.92576 2.01185                                                           |  | C 2.27828 1.21081 -0.00008                                                           |
| H 3.33594 -2.74405 -0.12434                                                         |  | N 2.87751 2.20386 -0.00003                                                           |
| H 4.52317 -1.46609 1.64189                                                          |  | <b>TS2a</b>                                                                          |
| C -1.33124 -0.28795 -0.60273                                                        |  |  |
| O -0.99367 -1.27363 -1.22106                                                        |  | C 0.97516 1.42899 -0.48422                                                           |
| O -2.41458 -0.23884 0.17914                                                         |  | C 0.23090 0.30204 -0.14244                                                           |
| C -3.17835 -1.45391 0.24954                                                         |  | H 0.73137 2.37552 -0.01762                                                           |
| C -4.32995 -1.20419 1.19697                                                         |  | H 1.51692 1.50087 -1.41606                                                           |
| H -2.52511 -2.25963 0.59684                                                         |  | C -0.66900 0.22849 0.92825                                                           |
| H -3.52095 -1.71371 -0.75657                                                        |  | C -0.98868 1.47578 1.70905                                                           |
| H -4.94397 -2.10399 1.27799                                                         |  | H -1.48092 1.18976 2.64131                                                           |
| H -3.96022 -0.94422 2.19120                                                         |  | H -0.06181 1.98798 1.99863                                                           |
| H -4.95680 -0.38669 0.83403                                                         |  | C -1.87852 2.43458 0.93738                                                           |
| <b>R2</b>                                                                           |  | C -1.54899 3.78139 0.78450                                                           |
|  |  | C -3.06471 1.96785 0.35911                                                           |
| C -4.42002 0.67975 0.40115                                                          |  | C -2.37661 4.64548 0.06772                                                           |
| C -4.41991 -0.68037 0.40033                                                         |  |                                                                                      |

|                                                                                     |          |          |          |   |          |          |          |
|-------------------------------------------------------------------------------------|----------|----------|----------|---|----------|----------|----------|
| C                                                                                   | -3.39754 | -1.51454 | -0.14367 | H | -0.63287 | 4.15792  | 1.23473  |
| C                                                                                   | -3.39782 | 1.51478  | -0.14183 | C | -3.89465 | 2.82579  | -0.35493 |
| C                                                                                   | -2.09711 | -1.23670 | -0.43757 | H | -3.32777 | 0.91901  | 0.47588  |
| C                                                                                   | -2.09732 | 1.23765  | -0.43612 | C | -3.55135 | 4.16977  | -0.50584 |
| C                                                                                   | -1.35881 | 0.00044  | -0.24874 | H | -2.10044 | 5.68961  | -0.04314 |
| H                                                                                   | -5.30899 | -1.18693 | 0.76533  | H | -4.81543 | 2.44818  | -0.79011 |
| H                                                                                   | -3.69198 | -2.54747 | -0.31381 | H | -4.19735 | 4.83959  | -1.06437 |
| H                                                                                   | -1.51342 | -2.06771 | -0.80920 | C | -1.26207 | -1.02796 | 1.27246  |
| H                                                                                   | -3.69248 | 2.54788  | -0.31058 | O | -0.99198 | -2.10748 | 0.73211  |
| H                                                                                   | -5.30919 | 1.18571  | 0.76679  | O | -2.19322 | -0.96052 | 2.24888  |
| H                                                                                   | -1.51379 | 2.06927  | -0.80661 | C | -2.76209 | -2.21020 | 2.64964  |
| C                                                                                   | 0.02891  | 0.00032  | -0.09085 | C | -3.75386 | -1.91449 | 3.75360  |
| C                                                                                   | 0.77860  | -1.25842 | 0.04146  | H | -1.96147 | -2.87513 | 2.98757  |
| C                                                                                   | 0.77911  | 1.25877  | 0.04114  | H | -3.23973 | -2.68026 | 1.78450  |
| C                                                                                   | 2.91048  | -0.00033 | -0.00470 | H | -4.21917 | -2.84149 | 4.09668  |
| O                                                                                   | 4.12662  | -0.00058 | -0.01861 | H | -3.25261 | -1.44179 | 4.60097  |
| O                                                                                   | 0.28182  | -2.36967 | 0.16858  | H | -4.53791 | -1.24310 | 3.39578  |
| O                                                                                   | 0.28292  | 2.37036  | 0.16763  | P | 0.33499  | -1.08628 | -1.31974 |
| N                                                                                   | 2.17305  | 1.17358  | 0.01338  | C | 1.26391  | -2.58471 | -0.90442 |
| N                                                                                   | 2.17254  | -1.17398 | 0.01347  | H | 2.32641  | -2.33320 | -0.93385 |
| C                                                                                   | 2.90015  | 2.44060  | 0.08783  | H | 0.97924  | -2.96145 | 0.07340  |
| H                                                                                   | 3.95514  | 2.22960  | -0.05685 | H | 1.06920  | -3.33365 | -1.67693 |
| H                                                                                   | 2.52913  | 3.11196  | -0.68626 | C | 1.23696  | -0.49751 | -2.79130 |
| H                                                                                   | 2.73453  | 2.90794  | 1.06027  | H | 2.26812  | -0.24396 | -2.53047 |
| C                                                                                   | 2.89899  | -2.44133 | 0.08860  | H | 1.24066  | -1.31454 | -3.51720 |
| H                                                                                   | 2.52756  | -3.11294 | -0.68509 | H | 0.73936  | 0.36795  | -3.23032 |
| H                                                                                   | 3.95410  | -2.23104 | -0.05626 | C | -1.33288 | -1.40629 | -1.94290 |
| H                                                                                   | 2.73311  | -2.90803 | 1.06131  | C | -1.79356 | -2.69390 | -2.21731 |
| PPhMe <sub>2</sub>                                                                  |          |          |          | C | -2.15217 | -0.29734 | -2.17297 |
| 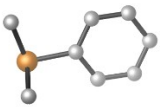 |          |          |          | C | -3.07241 | -2.86980 | -2.73677 |
| P                                                                                   | -1.65781 | -0.22505 | -0.57578 | H | -1.17473 | -3.55919 | -2.00333 |
| C                                                                                   | -2.12262 | -1.24756 | 0.90417  | C | -3.43308 | -0.48268 | -2.68525 |
| H                                                                                   | -3.20894 | -1.36822 | 0.92673  | H | -1.80421 | 0.70456  | -1.93148 |
| H                                                                                   | -1.67487 | -2.24037 | 0.81996  | C | -3.89098 | -1.76657 | -2.97065 |
| H                                                                                   | -1.78961 | -0.78518 | 1.83744  | H | -3.43423 | -3.87085 | -2.94561 |
| C                                                                                   | -2.31533 | 1.40709  | -0.00075 | H | -4.07152 | 0.37847  | -2.85351 |
| H                                                                                   | -2.04376 | 2.19796  | -0.70383 | H | -4.89034 | -1.90976 | -3.36831 |
| H                                                                                   | -3.40602 | 1.34040  | 0.02103  | C | 4.47802  | 2.67217  | -0.93325 |
| H                                                                                   | -1.95769 | 1.67149  | 0.99899  | C | 5.02858  | 1.65685  | -1.69964 |
|                                                                                     |          |          |          | C | 4.96387  | 0.27906  | -1.44029 |
|                                                                                     |          |          |          | C | 3.62505  | 2.55558  | 0.16656  |
|                                                                                     |          |          |          | C | 4.34173  | -0.41663 | -0.41949 |
|                                                                                     |          |          |          | C | 3.01968  | 1.42403  | 0.71373  |
|                                                                                     |          |          |          | C | 3.46239  | 0.04211  | 0.59768  |



|   |         |          |          |
|---|---------|----------|----------|
| C | 0.14613 | -0.03705 | -0.23732 |
| C | 0.95182 | -1.17944 | -0.34159 |
| C | 0.75822 | 1.18085  | 0.07186  |
| C | 2.32256 | -1.11176 | -0.11986 |
| H | 0.50016 | -2.13437 | -0.60262 |
| C | 2.13472 | 1.25312  | 0.28223  |
| H | 0.16695 | 2.08781  | 0.15029  |
| C | 2.91975 | 0.10845  | 0.19236  |
| H | 2.92691 | -2.01036 | -0.19664 |
| H | 2.59207 | 2.20895  | 0.51911  |
| H | 3.99053 | 0.16542  | 0.35957  |

TS1

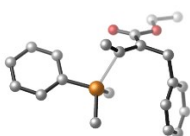

|   |          |          |          |
|---|----------|----------|----------|
| C | -1.12304 | 0.17179  | 2.72736  |
| C | -0.23359 | 0.23078  | 1.75169  |
| H | -0.94195 | 0.75155  | 3.62955  |
| H | -2.03983 | -0.40489 | 2.66924  |
| C | 1.00315  | 0.71527  | 1.40743  |
| C | 2.25544  | -0.06189 | 1.77140  |
| H | 3.09832  | 0.63000  | 1.84657  |
| H | 2.11508  | -0.52768 | 2.75191  |
| C | 2.55554  | -1.13115 | 0.74267  |
| C | 1.96782  | -2.39547 | 0.84623  |
| C | 3.35060  | -0.85261 | -0.37373 |
| C | 2.16238  | -3.35676 | -0.14481 |
| H | 1.35459  | -2.62581 | 1.71542  |
| C | 3.54249  | -1.80937 | -1.36743 |
| H | 3.80409  | 0.13056  | -0.46261 |
| C | 2.94492  | -3.06413 | -1.25930 |
| H | 1.70768  | -4.33838 | -0.04266 |
| H | 4.16110  | -1.57550 | -2.22860 |
| H | 3.09603  | -3.81097 | -2.03199 |
| C | 1.04886  | 1.81397  | 0.47570  |
| O | 0.08388  | 2.39789  | -0.01231 |
| O | 2.31913  | 2.18267  | 0.15559  |
| C | 2.42916  | 3.28029  | -0.75240 |
| C | 3.90441  | 3.51936  | -0.99220 |
| H | 1.93953  | 4.15774  | -0.31842 |
| H | 1.89981  | 3.03668  | -1.67908 |
| H | 4.04238  | 4.36373  | -1.67178 |

|   |         |          |          |
|---|---------|----------|----------|
| H | 5.62830 | 1.95514  | -2.55395 |
| H | 5.53750 | -0.34409 | -2.12276 |
| H | 4.55170 | -1.48335 | -0.39684 |
| H | 3.30041 | 3.49536  | 0.60635  |
| H | 4.72989 | 3.68796  | -1.22700 |
| H | 2.41517 | 1.61261  | 1.59469  |
| C | 2.95314 | -0.87985 | 1.53098  |
| C | 3.36920 | -2.24038 | 1.52700  |
| N | 3.71511 | -3.34862 | 1.48025  |
| C | 2.05061 | -0.49788 | 2.56082  |
| N | 1.31109 | -0.17412 | 3.39686  |

M2a

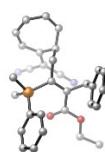

|   |          |          |          |
|---|----------|----------|----------|
| C | 1.36304  | 1.38294  | -0.41995 |
| C | 0.40069  | 0.23895  | -0.17523 |
| H | 0.83596  | 2.33701  | -0.31734 |
| H | 1.79736  | 1.36805  | -1.42081 |
| C | -0.47537 | 0.28001  | 0.85198  |
| C | -0.75201 | 1.54949  | 1.63130  |
| H | -1.19317 | 1.28409  | 2.59306  |
| H | 0.18061  | 2.07380  | 1.84659  |
| C | -1.67860 | 2.46021  | 0.84427  |
| C | -1.31260 | 3.77732  | 0.56256  |
| C | -2.90828 | 1.98739  | 0.37051  |
| C | -2.15194 | 4.60747  | -0.17900 |
| H | -0.36246 | 4.15714  | 0.93088  |
| C | -3.74571 | 2.81348  | -0.37219 |
| H | -3.20942 | 0.96661  | 0.59155  |
| C | -3.36895 | 4.12661  | -0.65136 |
| H | -1.85133 | 5.62920  | -0.38800 |
| H | -4.69809 | 2.43341  | -0.72956 |
| H | -4.02219 | 4.77049  | -1.23127 |
| C | -1.20177 | -0.96115 | 1.26777  |
| O | -0.91476 | -2.07093 | 0.86439  |
| O | -2.18453 | -0.73188 | 2.12945  |
| C | -2.84163 | -1.90321 | 2.65473  |
| C | -3.88378 | -1.42382 | 3.63808  |
| H | -2.08145 | -2.53272 | 3.12488  |
| H | -3.27725 | -2.45812 | 1.81891  |
| H | -4.40731 | -2.28176 | 4.06548  |

|                                                                                     |          |          |          |      |          |          |          |
|-------------------------------------------------------------------------------------|----------|----------|----------|------|----------|----------|----------|
| H                                                                                   | 4.41530  | 3.74202  | -0.05260 | H    | -3.41450 | -0.86374 | 4.44937  |
| H                                                                                   | 4.37077  | 2.63765  | -1.43926 | H    | -4.61554 | -0.78054 | 3.14398  |
| P                                                                                   | -1.26550 | -0.93656 | 0.02553  | P    | 0.42365  | -1.15726 | -1.35184 |
| C                                                                                   | -1.53792 | -2.74802 | -0.16134 | C    | 1.33627  | -2.65773 | -0.92703 |
| H                                                                                   | -0.55795 | -3.22889 | -0.15684 | H    | 2.39319  | -2.39224 | -0.86495 |
| H                                                                                   | -2.12256 | -3.13335 | 0.67690  | H    | 0.99131  | -3.06189 | 0.02106  |
| H                                                                                   | -2.04648 | -2.98166 | -1.10166 | H    | 1.19587  | -3.37767 | -1.73825 |
| C                                                                                   | -0.28255 | -0.50435 | -1.45479 | C    | 1.21195  | -0.55319 | -2.87139 |
| H                                                                                   | -0.28358 | 0.58219  | -1.56254 | H    | 2.27041  | -0.35026 | -2.69220 |
| H                                                                                   | 0.74777  | -0.84400 | -1.30589 | H    | 1.10603  | -1.33830 | -3.62390 |
| H                                                                                   | -0.70258 | -0.97247 | -2.34787 | H    | 0.71192  | 0.35009  | -3.22708 |
| C                                                                                   | -2.90608 | -0.19587 | -0.26516 | C    | -1.28456 | -1.49777 | -1.85217 |
| C                                                                                   | -4.07593 | -0.95493 | -0.37194 | C    | -1.77645 | -2.79956 | -1.95305 |
| C                                                                                   | -2.98733 | 1.20404  | -0.30618 | C    | -2.10516 | -0.40705 | -2.15733 |
| C                                                                                   | -5.30837 | -0.32633 | -0.53528 | C    | -3.08714 | -3.00794 | -2.37172 |
| H                                                                                   | -4.03660 | -2.03908 | -0.33271 | H    | -1.15460 | -3.64651 | -1.68172 |
| C                                                                                   | -4.22002 | 1.82399  | -0.48146 | C    | -3.41694 | -0.62346 | -2.56707 |
| H                                                                                   | -2.08103 | 1.79691  | -0.19288 | H    | -1.73685 | 0.61115  | -2.05324 |
| C                                                                                   | -5.38212 | 1.06215  | -0.59478 | C    | -3.90591 | -1.92311 | -2.67768 |
| H                                                                                   | -6.21057 | -0.92434 | -0.61767 | H    | -3.47216 | -4.01918 | -2.44694 |
| H                                                                                   | -4.27452 | 2.90735  | -0.52021 | H    | -4.05338 | 0.22507  | -2.79539 |
| H                                                                                   | -6.34311 | 1.54995  | -0.72366 | H    | -4.92912 | -2.09140 | -2.99724 |
| TS1-a                                                                               |          |          |          | C    | 4.22447  | 2.77116  | -0.58415 |
| 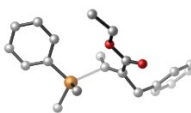 |          |          |          | C    | 4.51039  | 1.88685  | -1.68672 |
| C                                                                                   | 0.31677  | -1.12141 | -1.48974 | C    | 4.46358  | 0.52560  | -1.62314 |
| C                                                                                   | 0.40295  | -0.56506 | -0.29223 | C    | 3.45242  | 2.49646  | 0.48467  |
| H                                                                                   | 1.08371  | -0.88713 | -2.22470 | C    | 4.04201  | -0.32702 | -0.55027 |
| H                                                                                   | -0.49108 | -1.78349 | -1.78346 | C    | 2.52387  | 1.31974  | 0.61306  |
| C                                                                                   | 1.21216  | 0.20691  | 0.50295  | C    | 3.23731  | -0.01909 | 0.52437  |
| C                                                                                   | 2.39486  | -0.41533 | 1.21793  | H    | 4.93672  | 2.33365  | -2.58067 |
| H                                                                                   | 2.65007  | 0.22078  | 2.07153  | H    | 4.86739  | -0.00550 | -2.48543 |
| H                                                                                   | 2.12093  | -1.40461 | 1.60638  | H    | 4.41301  | -1.34930 | -0.60367 |
| C                                                                                   | 3.59585  | -0.54860 | 0.30711  | H    | 3.43403  | 3.20921  | 1.30557  |
| C                                                                                   | 3.97385  | -1.78136 | -0.22421 | H    | 4.73592  | 3.73262  | -0.59917 |
| C                                                                                   | 4.31576  | 0.59408  | -0.06029 | H    | 2.07179  | 1.37579  | 1.60621  |
| C                                                                                   | 5.05426  | -1.87849 | -1.10076 | C    | 2.91519  | -0.98939 | 1.53845  |
| H                                                                                   | 3.41544  | -2.67287 | 0.05126  | C    | 3.53002  | -2.26415 | 1.52406  |
| C                                                                                   | 5.39418  | 0.50002  | -0.93225 | N    | 4.03512  | -3.31066 | 1.44055  |
| H                                                                                   | 4.00718  | 1.55512  | 0.34467  | C    | 1.91196  | -0.76961 | 2.50381  |
|                                                                                     |          |          |          | N    | 1.05326  | -0.56155 | 3.26873  |
|                                                                                     |          |          |          | TS3a |          |          |          |







|   |          |          |          |
|---|----------|----------|----------|
| H | 1.18640  | -3.52693 | -0.32906 |
| H | 2.13356  | -3.48189 | -1.84218 |
| H | 2.94243  | -3.25159 | -0.27531 |
| C | 1.74013  | -0.78176 | 0.82977  |
| C | 0.52319  | -0.96196 | 1.49077  |
| C | 2.85651  | -0.30108 | 1.51375  |
| C | 0.42900  | -0.65754 | 2.84652  |
| H | -0.35191 | -1.31632 | 0.95015  |
| C | 2.75554  | -0.00911 | 2.86982  |
| H | 3.79292  | -0.13226 | 0.99032  |
| C | 1.54288  | -0.18594 | 3.53518  |
| H | -0.52108 | -0.78591 | 3.35527  |
| H | 3.62065  | 0.36804  | 3.40525  |
| H | 1.46724  | 0.05080  | 4.59165  |

M1-a

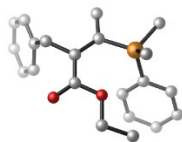

|   |          |          |          |
|---|----------|----------|----------|
| C | -1.11406 | 2.31516  | -0.82627 |
| C | -0.39332 | 1.53551  | 0.03549  |
| H | -2.19427 | 2.33979  | -0.76415 |
| H | -0.66984 | 2.91385  | -1.60685 |
| C | -0.94515 | 0.77116  | 1.11353  |
| C | -2.43082 | 0.90017  | 1.34279  |
| H | -2.64020 | 0.51699  | 2.34617  |
| H | -2.73369 | 1.95659  | 1.32349  |
| C | -3.28581 | 0.12786  | 0.35228  |
| C | -4.33583 | 0.72978  | -0.34133 |
| C | -3.03313 | -1.23096 | 0.13085  |
| C | -5.11150 | 0.00375  | -1.24476 |
| H | -4.54717 | 1.78410  | -0.17220 |
| C | -3.80703 | -1.96078 | -0.76503 |
| H | -2.22917 | -1.70652 | 0.68780  |
| C | -4.84813 | -1.34495 | -1.46066 |
| H | -5.91946 | 0.49428  | -1.77964 |
| H | -3.60263 | -3.01620 | -0.92068 |
| H | -5.44937 | -1.91498 | -2.16217 |
| C | -0.29449 | -0.19234 | 1.92050  |
| O | -0.82017 | -0.93128 | 2.75570  |
| O | 1.07518  | -0.29617 | 1.71096  |
| C | 1.70146  | -1.39690 | 2.36940  |

|   |          |          |          |
|---|----------|----------|----------|
| C | -3.79883 | -0.88342 | 2.28868  |
| C | -3.58857 | -0.61254 | -0.81589 |
| C | -2.67149 | -0.22397 | 1.54274  |
| C | -2.90454 | 0.10100  | 0.09167  |
| H | -5.31180 | -3.33487 | 0.46057  |
| H | -4.55198 | -2.39097 | -1.53933 |
| H | -3.56334 | -0.27069 | -1.84805 |
| H | -3.89865 | -0.56303 | 3.32388  |
| H | -5.33807 | -2.23937 | 2.60149  |
| H | -2.52631 | 0.73944  | 2.04573  |
| C | -1.99466 | 1.26479  | -0.32356 |
| C | -1.97195 | 1.42437  | -1.78496 |
| N | -1.91340 | 1.50593  | -2.93729 |
| C | -2.47740 | 2.52814  | 0.25605  |
| N | -2.85639 | 3.50096  | 0.75331  |

TS4a

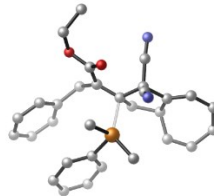

|   |          |          |          |
|---|----------|----------|----------|
| C | 1.53664  | 1.45787  | 0.95099  |
| C | 0.70736  | 0.19263  | 0.64973  |
| H | 1.39621  | 1.66008  | 2.01601  |
| H | 1.16732  | 2.33631  | 0.41388  |
| C | -0.61829 | 0.19814  | 1.23991  |
| C | -1.22504 | 1.41885  | 1.91085  |
| H | -2.00511 | 1.04600  | 2.57958  |
| H | -0.49612 | 1.92299  | 2.55698  |
| C | -1.84714 | 2.45998  | 1.00232  |
| C | -1.25266 | 3.70718  | 0.79815  |
| C | -3.03623 | 2.17044  | 0.32211  |
| C | -1.79984 | 4.62568  | -0.09892 |
| H | -0.34898 | 3.96159  | 1.34815  |
| C | -3.58663 | 3.08250  | -0.57312 |
| H | -3.51052 | 1.20749  | 0.50245  |
| C | -2.96211 | 4.31103  | -0.79604 |
| H | -1.31888 | 5.58749  | -0.24939 |
| H | -4.50673 | 2.83958  | -1.09671 |
| H | -3.38847 | 5.02129  | -1.49712 |
| C | -1.28917 | -1.05104 | 1.29240  |
| O | -0.79187 | -2.14218 | 0.99067  |
| O | -2.59453 | -0.98273 | 1.70226  |

|                                                                                     |          |          |          |   |          |          |          |
|-------------------------------------------------------------------------------------|----------|----------|----------|---|----------|----------|----------|
| C                                                                                   | 3.15687  | -1.43915 | 1.95124  | C | -3.28388 | -2.23130 | 1.73507  |
| H                                                                                   | 1.18274  | -2.32175 | 2.09631  | C | -4.74369 | -1.92733 | 1.99778  |
| H                                                                                   | 1.59549  | -1.27594 | 3.45159  | H | -2.85506 | -2.86742 | 2.51698  |
| H                                                                                   | 3.67858  | -2.21734 | 2.51446  | H | -3.14255 | -2.74417 | 0.77866  |
| H                                                                                   | 3.25526  | -1.66054 | 0.88551  | H | -5.31995 | -2.85435 | 2.05189  |
| H                                                                                   | 3.64985  | -0.48346 | 2.15521  | H | -4.86383 | -1.38818 | 2.94064  |
| P                                                                                   | 1.38382  | 1.60185  | -0.30610 | H | -5.15452 | -1.31079 | 1.19301  |
| C                                                                                   | 2.35492  | 2.23327  | 1.09192  | P | 0.48607  | 0.03095  | -1.39030 |
| H                                                                                   | 2.05657  | 1.71887  | 2.00174  | C | 1.80870  | -0.49451 | -2.55008 |
| H                                                                                   | 3.41854  | 2.07201  | 0.89890  | H | 2.62948  | 0.22213  | -2.51430 |
| H                                                                                   | 2.16020  | 3.30513  | 1.17323  | H | 2.19064  | -1.47430 | -2.25799 |
| C                                                                                   | 1.73934  | 2.80057  | -1.62895 | H | 1.39371  | -0.54616 | -3.56026 |
| H                                                                                   | 1.28659  | 2.47877  | -2.56712 | C | -0.01718 | 1.68949  | -1.94843 |
| H                                                                                   | 1.37153  | 3.79028  | -1.35431 | H | 0.84875  | 2.35046  | -2.01456 |
| H                                                                                   | 2.82384  | 2.84387  | -1.75466 | H | -0.47980 | 1.60159  | -2.93400 |
| C                                                                                   | 2.03445  | 0.04467  | -0.95862 | H | -0.73837 | 2.11299  | -1.24452 |
| C                                                                                   | 1.18685  | -1.05655 | -1.09980 | C | -0.93125 | -1.02652 | -1.77828 |
| C                                                                                   | 3.37131  | -0.03689 | -1.35343 | C | -0.75629 | -2.35625 | -2.17692 |
| C                                                                                   | 1.68816  | -2.24283 | -1.62485 | C | -2.22016 | -0.50426 | -1.64566 |
| H                                                                                   | 0.15083  | -0.98415 | -0.77759 | C | -1.86564 | -3.15621 | -2.41670 |
| C                                                                                   | 3.86726  | -1.22899 | -1.87424 | H | 0.23697  | -2.78153 | -2.27101 |
| H                                                                                   | 4.03883  | 0.81463  | -1.24548 | C | -3.32850 | -1.31588 | -1.87482 |
| C                                                                                   | 3.02603  | -2.33114 | -2.00686 | H | -2.36647 | 0.53291  | -1.36822 |
| H                                                                                   | 1.03350  | -3.10153 | -1.72901 | C | -3.15226 | -2.64203 | -2.25616 |
| H                                                                                   | 4.90820  | -1.29614 | -2.17201 | H | -1.72510 | -4.18859 | -2.71839 |
| H                                                                                   | 3.41372  | -3.26131 | -2.40940 | H | -4.32662 | -0.90451 | -1.75953 |
| <b>M1-b</b>                                                                         |          |          |          | H | -4.01507 | -3.27587 | -2.43534 |
| 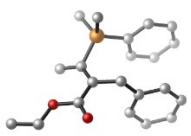 |          |          |          | C | 4.80273  | 1.52306  | -1.04378 |
| C                                                                                   | -1.89428 | 1.43143  | -1.47070 | C | 5.79824  | 0.66748  | -0.42118 |
| C                                                                                   | -1.19591 | 1.01487  | -0.37451 | C | 5.55457  | -0.46611 | 0.27680  |
| H                                                                                   | -2.76175 | 0.88000  | -1.80360 | C | 3.54716  | 1.71489  | -0.60788 |
| H                                                                                   | -1.64261 | 2.33275  | -2.01282 | C | 4.25134  | -1.04154 | 0.55732  |
| C                                                                                   | -1.40020 | -0.05348 | 0.56224  | C | 3.02174  | 1.17105  | 0.69665  |
| C                                                                                   | -0.27413 | -0.66196 | 1.36389  | C | 3.12042  | -0.33693 | 0.70671  |
| H                                                                                   | 0.37469  | 0.08164  | 1.85026  | H | 6.83699  | 0.90966  | -0.63142 |
| H                                                                                   | -0.73923 | -1.22108 | 2.18280  | H | 6.41028  | -1.06308 | 0.58118  |
| C                                                                                   | 0.64924  | -1.61846 | 0.61912  | H | 4.20851  | -2.12421 | 0.66143  |
| C                                                                                   | 0.26813  | -2.21859 | -0.58192 | H | 2.88223  | 2.34997  | -1.19152 |
| C                                                                                   | 1.91179  | -1.91642 | 1.13942  | H | 5.11886  | 2.04997  | -1.94161 |
|                                                                                     |          |          |          | H | 3.63684  | 1.57854  | 1.51138  |
|                                                                                     |          |          |          | C | 1.74495  | -0.96273 | 1.00700  |
|                                                                                     |          |          |          | C | 1.64103  | -2.24659 | 0.29504  |
|                                                                                     |          |          |          | N | 1.76917  | -3.21958 | -0.31713 |
|                                                                                     |          |          |          | C | 1.64892  | -1.19863 | 2.46340  |

|     |          |          |          |    |          |          |          |
|-----|----------|----------|----------|----|----------|----------|----------|
| C   | 1.12963  | -3.08689 | -1.24960 | N  | 1.63061  | -1.32718 | 3.61128  |
| H   | -0.70918 | -1.98330 | -0.99408 | Pa |          |          |          |
| C   | 2.77504  | -2.78386 | 0.47864  | C  | 1.08365  | 0.19280  | 1.71910  |
| H   | 2.22655  | -1.44503 | 2.06879  | C  | 0.01235  | -0.52930 | 0.94055  |
| C   | 2.38766  | -3.37199 | -0.72430 | H  | 1.15887  | -0.27214 | 2.71080  |
| H   | 0.81582  | -3.54378 | -2.18397 | H  | 0.85886  | 1.25176  | 1.86063  |
| H   | 3.75667  | -2.99147 | 0.89569  | C  | -1.26223 | -0.14193 | 0.82329  |
| H   | 3.05977  | -4.04666 | -1.24606 | C  | -1.73680 | 1.19234  | 1.36918  |
| C   | -2.64194 | -0.74583 | 0.68839  | H  | -2.82699 | 1.23460  | 1.30476  |
| O   | -2.86740 | -1.69914 | 1.43751  | H  | -1.47804 | 1.26774  | 2.43009  |
| O   | -3.66066 | -0.24861 | -0.09189 | C  | -1.13501 | 2.36658  | 0.61656  |
| C   | -4.91878 | -0.89025 | 0.07375  | C  | -0.63619 | 3.47166  | 1.30778  |
| C   | -5.88289 | -0.24086 | -0.89839 | C  | -1.05826 | 2.35235  | -0.77960 |
| H   | -5.25877 | -0.78033 | 1.10948  | C  | -0.06694 | 4.54294  | 0.62169  |
| H   | -4.81466 | -1.96335 | -0.11626 | H  | -0.68637 | 3.48963  | 2.39396  |
| H   | -6.87632 | -0.68695 | -0.80471 | C  | -0.49261 | 3.42201  | -1.46656 |
| H   | -5.96253 | 0.83116  | -0.70073 | H  | -1.43891 | 1.49404  | -1.32737 |
| H   | -5.53870 | -0.37519 | -1.92735 | C  | 0.00806  | 4.51977  | -0.76767 |
| P   | 0.16910  | 2.13499  | 0.03566  | H  | 0.32291  | 5.39145  | 1.17510  |
| C   | -0.07719 | 2.82313  | 1.69384  | H  | -0.43857 | 3.39629  | -2.55030 |
| H   | -1.05022 | 3.31988  | 1.68625  | H  | 0.45579  | 5.35032  | -1.30373 |
| H   | -0.09631 | 2.03161  | 2.44233  | C  | -2.24284 | -1.01217 | 0.10554  |
| H   | 0.70026  | 3.55305  | 1.92827  | O  | -2.18811 | -2.22130 | 0.08949  |
| C   | 0.25188  | 3.57660  | -1.06682 | O  | -3.18550 | -0.29530 | -0.51499 |
| H   | -0.66726 | 4.16092  | -1.00253 | C  | -4.16703 | -1.04845 | -1.25910 |
| H   | 1.10261  | 4.18441  | -0.75046 | C  | -5.24140 | -1.59137 | -0.33786 |
| H   | 0.41269  | 3.24993  | -2.09544 | H  | -3.65333 | -1.84936 | -1.79469 |
| C   | 1.79196  | 1.35524  | -0.09826 | H  | -4.57074 | -0.33094 | -1.97392 |
| C   | 2.79077  | 1.56159  | 0.85481  | H  | -6.00636 | -2.10342 | -0.92667 |
| C   | 2.03792  | 0.55889  | -1.22185 | H  | -4.81377 | -2.30567 | 0.36799  |
| C   | 4.04079  | 0.97392  | 0.67825  | H  | -5.71777 | -0.77875 | 0.21561  |
| H   | 2.59982  | 2.16515  | 1.73759  | C  | 3.76196  | 0.94349  | -0.86810 |
| C   | 3.28914  | -0.02107 | -1.39248 | C  | 4.72951  | -0.13596 | -0.83325 |
| H   | 1.24427  | 0.37111  | -1.94091 | C  | 4.45858  | -1.45477 | -0.63456 |
| C   | 4.28794  | 0.18726  | -0.44327 | C  | 2.63273  | 0.99112  | -0.13650 |
| H   | 4.81706  | 1.12659  | 1.42048  | C  | 3.13708  | -2.00562 | -0.42555 |
| H   | 3.47568  | -0.65661 | -2.25124 | C  | 2.37766  | -0.03302 | 0.93694  |
| H   | 5.26030  | -0.27700 | -0.57308 | C  | 2.16453  | -1.33288 | 0.20888  |
| TS2 |          |          |          | H  | 5.74486  | 0.11754  | -1.12930 |
|     |          |          |          | H  | 5.26672  | -2.16497 | -0.78759 |
|     |          |          |          | H  | 2.92605  | -2.98432 | -0.85390 |
|     |          |          |          | H  | 1.89221  | 1.77516  | -0.29704 |
|     |          |          |          | H  | 3.97427  | 1.75840  | -1.55614 |
|     |          |          |          | H  | 3.25841  | -0.10805 | 1.58613  |



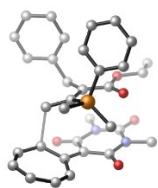

|   |          |          |          |
|---|----------|----------|----------|
| C | -0.39748 | -1.91198 | 1.04582  |
| C | 0.10439  | -0.96078 | 0.14644  |
| H | -0.14199 | -1.80327 | 2.09325  |
| H | -0.58018 | -2.92905 | 0.73405  |
| C | 0.64564  | 0.27225  | 0.51043  |
| C | 0.90920  | 0.55947  | 1.96949  |
| H | 1.10418  | 1.62792  | 2.08607  |
| H | 0.02040  | 0.33725  | 2.57373  |
| C | 2.09852  | -0.22065 | 2.50105  |
| C | 2.00889  | -1.00553 | 3.65060  |
| C | 3.32452  | -0.15594 | 1.82901  |
| C | 3.11377  | -1.71613 | 4.11948  |
| H | 1.06363  | -1.05707 | 4.18688  |
| C | 4.42959  | -0.86037 | 2.29427  |
| H | 3.40078  | 0.45344  | 0.93113  |
| C | 4.32670  | -1.64698 | 3.44185  |
| H | 3.02453  | -2.32420 | 5.01458  |
| H | 5.37593  | -0.79142 | 1.76537  |
| H | 5.18811  | -2.19860 | 3.80498  |
| C | 0.93970  | 1.26117  | -0.49457 |
| O | 0.71957  | 1.12641  | -1.70224 |
| O | 1.49903  | 2.38762  | -0.00936 |
| C | 1.81273  | 3.40279  | -0.97209 |
| C | 2.30126  | 4.60577  | -0.19838 |
| H | 0.91254  | 3.63890  | -1.54405 |
| H | 2.56852  | 3.01115  | -1.66113 |
| H | 2.58048  | 5.40490  | -0.88948 |
| H | 1.50152  | 4.96740  | 0.45111  |
| H | 3.17367  | 4.34982  | 0.40815  |
| P | 0.18945  | -1.51981 | -1.59271 |
| C | -0.96169 | -0.89348 | -2.83614 |
| H | -0.80927 | -1.47314 | -3.75089 |
| H | -1.97733 | -1.05601 | -2.46684 |
| H | -0.81572 | 0.16887  | -3.00319 |
| C | -0.17665 | -3.30585 | -1.61475 |
| H | -1.21053 | -3.48437 | -1.30490 |
| H | -0.04579 | -3.64800 | -2.64415 |
| H | 0.50886  | -3.85473 | -0.96844 |

|   |          |          |          |
|---|----------|----------|----------|
| C | 0.67639  | -1.73928 | 0.24218  |
| C | 0.20870  | -1.94634 | -1.14202 |
| N | -0.09261 | -2.06086 | -2.25119 |
| C | 0.50779  | -2.96931 | 1.04178  |
| N | 0.44156  | -3.91405 | 1.70310  |

TS1a'

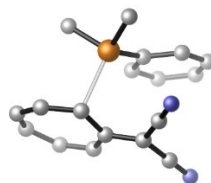

|   |          |          |          |
|---|----------|----------|----------|
| C | -3.70202 | -0.31180 | -0.38497 |
| C | -3.28036 | -1.38956 | -1.16521 |
| C | -2.12976 | -2.15031 | -0.96867 |
| C | -3.03201 | 0.32268  | 0.64837  |
| C | -1.10463 | -2.02989 | -0.03597 |
| C | -1.69853 | 0.16226  | 1.09712  |
| C | -0.85381 | -1.02486 | 0.92011  |
| H | -3.94797 | -1.71422 | -1.95704 |
| H | -2.01979 | -3.00024 | -1.63918 |
| H | -0.35385 | -2.81462 | -0.07565 |
| H | -3.57523 | 1.12317  | 1.14407  |
| H | -4.69772 | 0.07113  | -0.59897 |
| H | -1.49026 | 0.68904  | 2.02473  |
| C | 0.32661  | -1.06695 | 1.68792  |
| P | -0.31498 | 1.69412  | -0.11638 |
| C | 0.32351  | 3.24687  | 0.61743  |
| H | -0.53117 | 3.86809  | 0.89527  |
| H | 0.88432  | 3.00702  | 1.52354  |
| H | 0.95543  | 3.79151  | -0.08884 |
| C | -1.41049 | 2.21981  | -1.48151 |
| H | -1.77523 | 1.34154  | -2.01907 |
| H | -2.27891 | 2.72551  | -1.04997 |
| H | -0.89660 | 2.89289  | -2.17092 |
| C | 1.09376  | 0.85071  | -0.86944 |
| C | 2.38568  | 1.02882  | -0.35261 |
| C | 0.87636  | -0.12017 | -1.85575 |
| C | 3.44014  | 0.26328  | -0.83283 |
| H | 2.56510  | 1.75503  | 0.43449  |
| C | 1.93991  | -0.88241 | -2.33351 |
| H | -0.12167 | -0.28867 | -2.25095 |
| C | 3.22016  | -0.69340 | -1.82389 |

|    |          |          |          |   |         |          |          |
|----|----------|----------|----------|---|---------|----------|----------|
| C  | 1.91763  | -1.41453 | -2.11087 | H | 4.43599 | 0.40744  | -0.42719 |
| C  | 2.89573  | -1.80120 | -1.19077 | H | 1.76326 | -1.63093 | -3.09900 |
| C  | 2.27753  | -0.98088 | -3.38659 | H | 4.04529 | -1.29571 | -2.18899 |
| C  | 4.23787  | -1.75865 | -1.55565 | C | 1.26610 | -2.12496 | 1.54641  |
| H  | 2.61596  | -2.10944 | -0.18572 | N | 2.02369 | -2.99498 | 1.41139  |
| C  | 3.62129  | -0.94963 | -3.74663 | C | 0.72394 | 0.02719  | 2.50023  |
| H  | 1.52006  | -0.64511 | -4.08799 | N | 1.04149 | 0.95161  | 3.13288  |
| C  | 4.59939  | -1.33740 | -2.83317 |   |         |          |          |
| H  | 4.99741  | -2.04879 | -0.83677 |   |         |          |          |
| H  | 3.90520  | -0.60909 | -4.73665 |   |         |          |          |
| H  | 5.64660  | -1.30363 | -3.11585 |   |         |          |          |
| C  | -3.56191 | -3.87121 | 1.18127  |   |         |          |          |
| C  | -4.04275 | -3.81945 | -0.13562 |   |         |          |          |
| C  | -4.18484 | -2.67399 | -0.90171 |   |         |          |          |
| C  | -2.98262 | -2.85035 | 1.90158  |   |         |          |          |
| C  | -3.86264 | -1.33351 | -0.64056 |   |         |          |          |
| C  | -2.58650 | -1.54726 | 1.50122  |   |         |          |          |
| C  | -3.10841 | -0.75121 | 0.39664  |   |         |          |          |
| H  | -4.42064 | -4.74469 | -0.56049 |   |         |          |          |
| H  | -4.68812 | -2.82236 | -1.85572 |   |         |          |          |
| H  | -4.22124 | -0.63903 | -1.38586 |   |         |          |          |
| H  | -2.67675 | -3.10838 | 2.91327  |   |         |          |          |
| H  | -3.66640 | -4.82376 | 1.69575  |   |         |          |          |
| H  | -2.22811 | -0.94553 | 2.31975  |   |         |          |          |
| C  | -2.73967 | 0.64302  | 0.34444  |   |         |          |          |
| C  | -2.69397 | 1.34959  | -0.92204 |   |         |          |          |
| C  | -2.31385 | 1.35010  | 1.54250  |   |         |          |          |
| C  | -1.49733 | 3.22756  | 0.15560  |   |         |          |          |
| O  | -0.93427 | 4.31116  | 0.08253  |   |         |          |          |
| O  | -3.14070 | 0.95623  | -2.00280 |   |         |          |          |
| O  | -2.48303 | 0.96449  | 2.70141  |   |         |          |          |
| N  | -1.66431 | 2.58414  | 1.36421  |   |         |          |          |
| N  | -2.02781 | 2.58868  | -0.94348 |   |         |          |          |
| C  | -1.15756 | 3.29897  | 2.53200  |   |         |          |          |
| H  | -1.14827 | 2.60653  | 3.36866  |   |         |          |          |
| H  | -0.15332 | 3.66017  | 2.30806  |   |         |          |          |
| H  | -1.79508 | 4.15546  | 2.76527  |   |         |          |          |
| C  | -1.85842 | 3.22051  | -2.24808 |   |         |          |          |
| H  | -2.79707 | 3.16470  | -2.79597 |   |         |          |          |
| H  | -1.56307 | 4.25368  | -2.08489 |   |         |          |          |
| H  | -1.07962 | 2.69404  | -2.80815 |   |         |          |          |
| M2 |          |          |          |   |         |          |          |

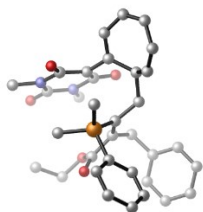

M1a'

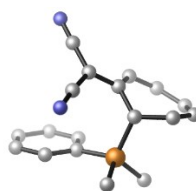

|   |          |          |          |
|---|----------|----------|----------|
| C | 0.06931  | -1.54987 | -1.25383 |
| C | -0.24563 | -0.38495 | -0.32433 |
| H | -0.06793 | -1.16633 | -2.25829 |
| H | -0.72756 | -2.29276 | -1.10008 |
| C | -0.87160 | 0.71902  | -0.80005 |
| C | -1.33504 | 0.89798  | -2.23980 |
| H | -1.36528 | 1.96421  | -2.47028 |
| H | -0.64488 | 0.43808  | -2.94432 |
| C | -2.72843 | 0.29930  | -2.31657 |
| C | -2.94301 | -0.97297 | -2.85238 |
| C | -3.80851 | 0.97638  | -1.73915 |
| C | -4.20470 | -1.56236 | -2.79754 |
| H | -2.11922 | -1.50380 | -3.32114 |
| C | -5.06784 | 0.38849  | -1.67957 |
| H | -3.65926 | 1.97515  | -1.33448 |
| C | -5.26802 | -0.88784 | -2.20311 |
| H | -4.35533 | -2.54956 | -3.22286 |
| H | -5.89376 | 0.92706  | -1.22583 |
| H | -6.24976 | -1.34822 | -2.15750 |
| C | -1.34739 | 1.80947  | 0.11528  |
| O | -1.78757 | 1.63446  | 1.23293  |
| O | -1.24884 | 3.01124  | -0.45158 |
| C | -1.64420 | 4.14668  | 0.34974  |
| C | -0.57310 | 4.49419  | 1.36496  |
| H | -2.60136 | 3.91817  | 0.82505  |
| H | -1.78057 | 4.94525  | -0.38001 |
| H | -0.81166 | 5.45168  | 1.83497  |
| H | -0.52459 | 3.73349  | 2.14760  |
| H | 0.40351  | 4.57298  | 0.87811  |
| P | -0.07358 | -0.61105 | 1.48513  |
| C | 0.57399  | 0.84066  | 2.38135  |
| H | 1.54434  | 0.55746  | 2.79657  |
| H | 0.71170  | 1.68132  | 1.70137  |
| H | -0.13484 | 1.12316  | 3.16083  |
| C | 1.04605  | -1.93208 | 2.01125  |
| H | 2.07336  | -1.73279 | 1.69177  |
| H | 1.00929  | -1.89845 | 3.10525  |

|   |          |          |          |
|---|----------|----------|----------|
| C | 3.62803  | 0.18033  | -0.17671 |
| C | 3.21771  | 0.48071  | -1.51870 |
| C | 2.08449  | 1.16817  | -1.85896 |
| C | 2.84533  | 0.11579  | 0.92220  |
| C | 1.03174  | 1.68108  | -1.04566 |
| C | 1.34612  | 0.16123  | 0.94980  |
| C | 0.68193  | 1.32369  | 0.23716  |
| H | 3.92698  | 0.26000  | -2.31085 |
| H | 1.99325  | 1.42798  | -2.91302 |
| H | 0.38394  | 2.41120  | -1.52404 |
| H | 3.31958  | -0.01412 | 1.89053  |
| H | 4.69524  | 0.02706  | -0.02327 |
| H | 1.04710  | 0.20205  | 2.00120  |
| C | -0.41789 | 1.90757  | 0.93721  |
| P | 0.55038  | -1.44904 | 0.43225  |
| C | 0.31787  | -2.40333 | 1.95141  |
| H | 1.30102  | -2.56703 | 2.40040  |
| H | -0.29807 | -1.82275 | 2.64400  |
| H | -0.15237 | -3.36477 | 1.73647  |
| C | 1.61237  | -2.41834 | -0.66671 |
| H | 1.78883  | -1.87087 | -1.59327 |
| H | 2.57167  | -2.58085 | -0.17261 |
| H | 1.12268  | -3.37299 | -0.86944 |
| C | -1.03980 | -1.19534 | -0.36733 |
| C | -2.22782 | -1.33026 | 0.35928  |
| C | -1.07228 | -0.80661 | -1.71253 |
| C | -3.44490 | -1.08149 | -0.26520 |
| H | -2.21064 | -1.59850 | 1.41008  |
| C | -2.29473 | -0.55853 | -2.32547 |
| H | -0.15118 | -0.67864 | -2.27371 |
| C | -3.47795 | -0.69657 | -1.60294 |
| H | -4.36621 | -1.17888 | 0.29829  |
| H | -2.32234 | -0.25138 | -3.36515 |
| H | -4.43002 | -0.49731 | -2.08370 |
| C | -0.97660 | 1.24834  | 2.05381  |
| N | -1.37923 | 0.62131  | 2.95325  |
| C | -1.08034 | 3.04952  | 0.42534  |



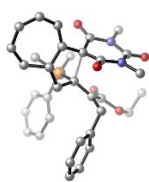

|   |          |          |          |
|---|----------|----------|----------|
| C | -0.39713 | -1.54293 | 0.92534  |
| C | -0.23819 | -0.25805 | 0.07089  |
| H | 0.08888  | -1.34764 | 1.87929  |
| H | 0.18986  | -2.34788 | 0.46587  |
| C | 0.75406  | 0.67481  | 0.51287  |
| C | 1.14802  | 0.80606  | 1.97845  |
| H | 1.40904  | 1.85138  | 2.16775  |
| H | 0.30788  | 0.57752  | 2.63765  |
| C | 2.32690  | -0.06433 | 2.39136  |
| C | 2.20833  | -0.97367 | 3.44482  |
| C | 3.55650  | 0.02224  | 1.72642  |
| C | 3.27772  | -1.78638 | 3.81993  |
| H | 1.26321  | -1.04586 | 3.97940  |
| C | 4.62687  | -0.78512 | 2.09853  |
| H | 3.66841  | 0.73362  | 0.91297  |
| C | 4.49082  | -1.69686 | 3.14552  |
| H | 3.15941  | -2.48955 | 4.63857  |
| H | 5.57418  | -0.69817 | 1.57406  |
| H | 5.32619  | -2.32672 | 3.43427  |
| C | 1.38908  | 1.52623  | -0.43222 |
| O | 1.30024  | 1.41715  | -1.66616 |
| O | 2.17734  | 2.49003  | 0.11040  |
| C | 2.82780  | 3.37234  | -0.81080 |
| C | 1.86870  | 4.42240  | -1.34082 |
| H | 3.26042  | 2.78602  | -1.62544 |
| H | 3.63171  | 3.82847  | -0.22887 |
| H | 1.35729  | 4.92292  | -0.51592 |
| H | 2.41351  | 5.16640  | -1.92867 |
| H | 1.11819  | 3.95232  | -1.97903 |
| P | -0.14214 | -0.70097 | -1.75257 |
| C | -0.59252 | 0.43168  | -3.11623 |
| H | -1.50225 | 0.07501  | -3.59662 |
| H | -0.71748 | 1.44049  | -2.73791 |
| H | 0.25811  | 0.44467  | -3.79911 |
| C | -1.30204 | -2.07283 | -2.06344 |
| H | -2.32557 | -1.74116 | -1.87291 |
| H | -1.19752 | -2.32839 | -3.12173 |
| H | -1.07255 | -2.95370 | -1.46849 |

|   |          |          |          |
|---|----------|----------|----------|
| H | 1.24066  | -1.31454 | -3.51720 |
| H | 0.73936  | 0.36795  | -3.23032 |
| C | -1.33288 | -1.40629 | -1.94290 |
| C | -1.79356 | -2.69390 | -2.21731 |
| C | -2.15217 | -0.29734 | -2.17297 |
| C | -3.07241 | -2.86980 | -2.73677 |
| H | -1.17473 | -3.55919 | -2.00333 |
| C | -3.43308 | -0.48268 | -2.68525 |
| H | -1.80421 | 0.70456  | -1.93148 |
| C | -3.89098 | -1.76657 | -2.97065 |
| H | -3.43423 | -3.87085 | -2.94561 |
| H | -4.07152 | 0.37847  | -2.85351 |
| H | -4.89034 | -1.90976 | -3.36831 |
| C | 4.47802  | 2.67217  | -0.93325 |
| C | 5.02858  | 1.65685  | -1.69964 |
| C | 4.96387  | 0.27906  | -1.44029 |
| C | 3.62505  | 2.55558  | 0.16656  |
| C | 4.34173  | -0.41663 | -0.41949 |
| C | 3.01968  | 1.42403  | 0.71373  |
| C | 3.46239  | 0.04211  | 0.59768  |
| H | 5.62830  | 1.95514  | -2.55395 |
| H | 5.53750  | -0.34409 | -2.12276 |
| H | 4.55170  | -1.48335 | -0.39684 |
| H | 3.30041  | 3.49536  | 0.60635  |
| H | 4.72989  | 3.68796  | -1.22700 |
| H | 2.41517  | 1.61261  | 1.59469  |
| C | 2.95314  | -0.87985 | 1.53098  |
| C | 3.36920  | -2.24038 | 1.52700  |
| N | 3.71511  | -3.34862 | 1.48025  |
| C | 2.05061  | -0.49788 | 2.56082  |
| N | 1.31109  | -0.17412 | 3.39686  |

M2a'

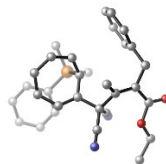

|   |          |          |         |
|---|----------|----------|---------|
| C | -1.64581 | 2.18550  | 2.10049 |
| C | -2.74711 | 1.26817  | 2.34092 |
| C | -2.67629 | -0.08343 | 2.27812 |
| C | -0.63427 | 1.97761  | 1.24232 |
| C | -1.49583 | -0.86564 | 1.95987 |
| C | -0.56879 | 0.78799  | 0.31532 |
| C | -0.50897 | -0.48376 | 1.13086 |

|    |          |          |          |   |          |          |          |
|----|----------|----------|----------|---|----------|----------|----------|
| C  | 1.47753  | -1.46072 | -2.09271 | H | -3.67224 | 1.70223  | 2.71356  |
| C  | 2.44221  | -1.64925 | -1.10115 | H | -3.55150 | -0.65071 | 2.58562  |
| C  | 1.71873  | -1.92264 | -3.39102 | H | -1.40747 | -1.82899 | 2.45693  |
| C  | 3.64268  | -2.28160 | -1.41299 | H | 0.20485  | 2.66507  | 1.18595  |
| H  | 2.27335  | -1.29151 | -0.09171 | H | -1.64169 | 3.10340  | 2.68359  |
| C  | 2.92079  | -2.55193 | -3.69657 | H | 0.35598  | 0.86742  | -0.27121 |
| H  | 0.97599  | -1.79265 | -4.17418 | C | 0.79894  | -1.27230 | 0.93751  |
| C  | 3.88525  | -2.73165 | -2.70716 | P | -1.88367 | 0.85589  | -1.00878 |
| H  | 4.38602  | -2.41482 | -0.63326 | C | -1.08326 | 0.57422  | -2.60707 |
| H  | 3.10221  | -2.90159 | -4.70743 | H | -0.27128 | 1.29641  | -2.71934 |
| H  | 4.82239  | -3.22362 | -2.94653 | H | -0.67178 | -0.43531 | -2.65520 |
| C  | -3.22342 | -4.11041 | 0.62260  | H | -1.82470 | 0.71702  | -3.39612 |
| C  | -4.56240 | -3.59192 | 0.84963  | C | -2.54730 | 2.53685  | -1.07702 |
| C  | -4.94606 | -2.30450 | 0.73738  | H | -3.10087 | 2.77328  | -0.16850 |
| C  | -2.06608 | -3.44115 | 0.71109  | H | -1.70034 | 3.22457  | -1.15828 |
| C  | -4.12415 | -1.15042 | 0.40812  | H | -3.18948 | 2.62740  | -1.95576 |
| C  | -1.85189 | -2.01951 | 1.18524  | C | -3.23583 | -0.32692 | -0.86065 |
| C  | -2.79799 | -0.99998 | 0.56947  | C | -2.97167 | -1.68674 | -1.05502 |
| H  | -5.33321 | -4.33110 | 1.05323  | C | -4.52762 | 0.10682  | -0.54653 |
| H  | -6.00447 | -2.08820 | 0.86315  | C | -4.00437 | -2.60965 | -0.91955 |
| H  | -4.67120 | -0.29037 | 0.02976  | H | -1.97045 | -2.02879 | -1.30342 |
| H  | -1.15917 | -3.99722 | 0.47441  | C | -5.55397 | -0.82220 | -0.42456 |
| H  | -3.16657 | -5.16185 | 0.34771  | H | -4.73536 | 1.16002  | -0.38460 |
| H  | -2.01664 | -1.98718 | 2.27060  | C | -5.29057 | -2.17912 | -0.60437 |
| C  | -2.12253 | 0.31106  | 0.33751  | H | -3.80066 | -3.66512 | -1.06248 |
| C  | -2.52910 | 1.11825  | -0.81649 | H | -6.55728 | -0.48760 | -0.18436 |
| C  | -1.95179 | 1.04402  | 1.61181  | H | -6.09191 | -2.90313 | -0.50046 |
| C  | -1.53775 | 3.07422  | 0.30566  | C | 1.92109  | 0.39296  | 2.35525  |
| O  | -1.15012 | 4.22484  | 0.24962  | C | 2.01147  | -0.30873 | 1.20266  |
| O  | -3.13269 | 0.67377  | -1.78604 | H | 1.07486  | 0.30494  | 3.02668  |
| O  | -2.05066 | 0.50558  | 2.70627  | H | 2.71519  | 1.07213  | 2.64272  |
| N  | -1.56423 | 2.37200  | 1.50232  | C | 2.97988  | -0.11775 | 0.16332  |
| N  | -2.06231 | 2.43514  | -0.81272 | C | 3.70692  | 1.20155  | 0.08471  |
| C  | -1.18489 | 3.12734  | 2.69416  | H | 4.28685  | 1.42233  | 0.99472  |
| H  | -0.22233 | 3.60802  | 2.51914  | H | 4.43190  | 1.11019  | -0.73106 |
| H  | -1.93099 | 3.89630  | 2.90493  | C | 2.79962  | 2.38098  | -0.19706 |
| H  | -1.12591 | 2.42652  | 3.52278  | C | 2.03354  | 2.40599  | -1.36995 |
| C  | -2.26973 | 3.28768  | -1.98202 | C | 2.69996  | 3.46593  | 0.67666  |
| H  | -2.74656 | 2.68234  | -2.74875 | C | 1.19323  | 3.47922  | -1.65613 |
| H  | -2.90518 | 4.13428  | -1.71740 | H | 2.11885  | 1.56321  | -2.05500 |
| H  | -1.30962 | 3.67175  | -2.33187 | C | 1.85824  | 4.54473  | 0.39793  |
| M3 |          |          |          | H | 3.29658  | 3.46593  | 1.58558  |
|    |          |          |          | C | 1.09618  | 4.55320  | -0.76673 |
|    |          |          |          | H | 0.63420  | 3.50141  | -2.58958 |

|                                                                                   |                                                                                     |          |          |          |          |          |          |
|-----------------------------------------------------------------------------------|-------------------------------------------------------------------------------------|----------|----------|----------|----------|----------|----------|
| 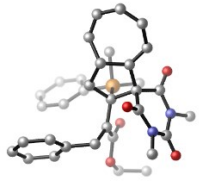 | H                                                                                   | 1.79760  | 5.37642  | 1.09341  |          |          |          |
|                                                                                   | H                                                                                   | 0.44879  | 5.39498  | -0.99327 |          |          |          |
|                                                                                   | C                                                                                   | 3.51526  | -1.18860 | -0.59620 |          |          |          |
|                                                                                   | O                                                                                   | 4.29437  | -1.13281 | -1.54737 |          |          |          |
|                                                                                   | O                                                                                   | 3.08259  | -2.42849 | -0.13792 |          |          |          |
|                                                                                   | C                                                                                   | 3.30920  | -3.51575 | -1.02738 |          |          |          |
|                                                                                   | C                                                                                   | 2.68846  | -4.74672 | -0.39928 |          |          |          |
|                                                                                   | H                                                                                   | 4.38527  | -3.63567 | -1.18423 |          |          |          |
|                                                                                   | H                                                                                   | 2.85613  | -3.29086 | -2.00084 |          |          |          |
|                                                                                   | H                                                                                   | 2.88840  | -5.62863 | -1.01364 |          |          |          |
|                                                                                   | H                                                                                   | 3.09959  | -4.91353 | 0.59933  |          |          |          |
|                                                                                   | H                                                                                   | 1.60511  | -4.62829 | -0.30571 |          |          |          |
|                                                                                   | C                                                                                   | 0.70334  | -1.75969 | -0.45922 |          |          |          |
|                                                                                   | N                                                                                   | 0.42094  | -2.10931 | -1.52663 |          |          |          |
|                                                                                   | C                                                                                   | 0.86247  | -2.44647 | 1.82345  |          |          |          |
|                                                                                   | N                                                                                   | 0.88041  | -3.36058 | 2.52990  |          |          |          |
|                                                                                   | TS3a'                                                                               |          |          |          |          |          |          |
|                                                                                   |  |          |          |          |          |          |          |
| C                                                                                 | -0.32117                                                                            | -1.62169 | 0.80755  | C        | 1.64325  | -3.72344 | 0.58345  |
| C                                                                                 | -0.36926                                                                            | -0.24671 | 0.06645  | C        | 2.51338  | -3.14272 | 1.58874  |
| H                                                                                 | 0.12406                                                                             | -1.44357 | 1.78692  | C        | 2.43326  | -1.91449 | 2.15154  |
| H                                                                                 | 0.34914                                                                             | -2.32205 | 0.30021  | C        | 0.86444  | -3.05572 | -0.29333 |
| C                                                                                 | 0.61390                                                                             | 0.74976  | 0.61330  | C        | 1.43443  | -0.88695 | 1.91400  |
| C                                                                                 | 0.99373                                                                             | 0.87139  | 2.07672  | C        | 0.69843  | -1.61212 | -0.37399 |
| H                                                                                 | 1.25022                                                                             | 1.92182  | 2.25867  | C        | 0.68413  | -0.74420 | 0.80798  |
| H                                                                                 | 0.15040                                                                             | 0.64167  | 2.73430  | H        | 3.29225  | -3.80212 | 1.96572  |
| C                                                                                 | 2.17135                                                                             | 0.01580  | 2.52425  | H        | 3.15464  | -1.67983 | 2.93019  |
| C                                                                                 | 2.02760                                                                             | -0.92176 | 3.54919  | H        | 1.31479  | -0.15175 | 2.70532  |
| C                                                                                 | 3.42883                                                                             | 0.15624  | 1.92394  | H        | 0.31431  | -3.62605 | -1.03673 |
| C                                                                                 | 3.10071                                                                             | -1.71317 | 3.95796  | H        | 1.67829  | -4.80561 | 0.49397  |
| H                                                                                 | 1.05862                                                                             | -1.03529 | 4.03159  | H        | 0.26478  | -1.21477 | -1.28372 |
| C                                                                                 | 4.50303                                                                             | -0.62902 | 2.33096  | C        | -0.33334 | 0.40077  | 0.63909  |
| H                                                                                 | 3.55409                                                                             | 0.88963  | 1.13202  | P        | 2.97845  | -1.02091 | -1.26971 |
| C                                                                                 | 4.34246                                                                             | -1.57098 | 3.34759  | C        | 2.74346  | -0.28829 | -2.93724 |
| H                                                                                 | 2.96326                                                                             | -2.44065 | 4.75199  | H        | 2.20445  | -1.01267 | -3.55372 |
| H                                                                                 | 5.47239                                                                             | -0.50186 | 1.85736  | H        | 2.14100  | 0.61937  | -2.86471 |
| H                                                                                 | 5.18110                                                                             | -2.18393 | 3.66231  | H        | 3.70470  | -0.06127 | -3.40577 |
| C                                                                                 | 1.22914                                                                             | 1.52120  | -0.33045 | C        | 3.96668  | -2.52484 | -1.64309 |
| O                                                                                 | 1.03093                                                                             | 1.34021  | -1.58904 |          |          |          |          |
| O                                                                                 | 2.11234                                                                             | 2.47540  | 0.06047  |          |          |          |          |
| C                                                                                 | 2.66046                                                                             | 3.30595  | -0.96701 |          |          |          |          |
| C                                                                                 | 1.64058                                                                             | 4.30666  | -1.48064 |          |          |          |          |
| H                                                                                 | 3.04049                                                                             | 2.67965  | -1.77842 |          |          |          |          |
| H                                                                                 | 3.49963                                                                             | 3.81187  | -0.48470 |          |          |          |          |
| H                                                                                 | 2.11850                                                                             | 5.02397  | -2.15356 |          |          |          |          |
| H                                                                                 | 0.85546                                                                             | 3.78140  | -2.02837 |          |          |          |          |
| H                                                                                 | 1.18666                                                                             | 4.84939  | -0.64809 |          |          |          |          |
| P                                                                                 | 0.03717                                                                             | -0.48452 | -1.81213 |          |          |          |          |
| C                                                                                 | -0.54673                                                                            | 0.46055  | -3.28194 |          |          |          |          |
| H                                                                                 | -1.39748                                                                            | -0.03166 | -3.74800 |          |          |          |          |
| H                                                                                 | -0.78724                                                                            | 1.48182  | -3.00247 |          |          |          |          |
| H                                                                                 | 0.30880                                                                             | 0.50527  | -3.96100 |          |          |          |          |
| C                                                                                 | -0.93056                                                                            | -2.02294 | -2.20348 |          |          |          |          |
| H                                                                                 | -2.00089                                                                            | -1.85163 | -2.05954 |          |          |          |          |
| H                                                                                 | -0.75281                                                                            | -2.25169 | -3.25887 |          |          |          |          |
| H                                                                                 | -0.61759                                                                            | -2.88714 | -1.62166 |          |          |          |          |

|     |          |          |          |   |          |          |          |
|-----|----------|----------|----------|---|----------|----------|----------|
| C   | 1.70374  | -1.19522 | -2.05822 | H | 4.24915  | -3.03070 | -0.71783 |
| C   | 2.59759  | -1.39149 | -1.00214 | H | 3.34323  | -3.20931 | -2.22403 |
| C   | 2.06720  | -1.60442 | -3.34513 | H | 4.86285  | -2.27062 | -2.21473 |
| C   | 3.84213  | -1.96992 | -1.23713 | C | 4.14667  | 0.10083  | -0.43357 |
| H   | 2.33822  | -1.08764 | 0.00506  | C | 4.14498  | 1.47357  | -0.70746 |
| C   | 3.31480  | -2.17650 | -3.57623 | C | 5.01714  | -0.39906 | 0.54402  |
| H   | 1.38183  | -1.47940 | -4.17913 | C | 5.01144  | 2.32407  | -0.02554 |
| C   | 4.20615  | -2.36058 | -2.52223 | H | 3.46180  | 1.88553  | -1.44267 |
| H   | 4.52277  | -2.10972 | -0.40258 | C | 5.88474  | 0.45304  | 1.21704  |
| H   | 3.58666  | -2.48099 | -4.58168 | H | 5.01506  | -1.45908 | 0.78295  |
| H   | 5.17712  | -2.81059 | -2.70231 | C | 5.88361  | 1.81800  | 0.93383  |
| C   | -3.04523 | -4.26685 | 0.23260  | H | 5.00205  | 3.38621  | -0.24732 |
| C   | -4.39041 | -3.78273 | 0.50632  | H | 6.56276  | 0.05186  | 1.96348  |
| C   | -4.80302 | -2.49921 | 0.48428  | H | 6.55809  | 2.48359  | 1.46257  |
| C   | -1.89757 | -3.59218 | 0.38234  | C | 0.32794  | 1.31257  | -0.32665 |
| C   | -4.00210 | -1.31397 | 0.21554  | N | 0.94795  | 1.92405  | -1.08851 |
| C   | -1.74116 | -2.21391 | 0.98338  | C | -0.58176 | 1.10233  | 1.90860  |
| C   | -2.68104 | -1.17938 | 0.39768  | N | -0.74928 | 1.60111  | 2.93696  |
| H   | -5.14673 | -4.54721 | 0.66724  | C | -1.70920 | -1.60027 | 0.29981  |
| H   | -5.86439 | -2.31335 | 0.63067  | C | -1.63439 | -0.22852 | 0.04830  |
| H   | -4.55678 | -0.44692 | -0.13533 | H | -1.24399 | -2.02590 | 1.17710  |
| H   | -0.97559 | -4.10158 | 0.10626  | H | -2.52678 | -2.17118 | -0.12583 |
| H   | -2.97870 | -5.29056 | -0.12978 | C | -2.48300 | 0.47201  | -0.79517 |
| H   | -1.95983 | -2.27903 | 2.05829  | C | -3.59199 | -0.27081 | -1.49586 |
| C   | -1.95161 | 0.14192  | 0.26221  | H | -3.99051 | 0.39454  | -2.26852 |
| C   | -2.44526 | 1.03727  | -0.84854 | H | -3.19461 | -1.15240 | -2.01683 |
| C   | -2.02987 | 0.82873  | 1.62512  | C | -4.73521 | -0.71833 | -0.59739 |
| C   | -1.71655 | 2.96638  | 0.47998  | C | -5.52393 | -1.81283 | -0.96196 |
| O   | -1.39835 | 4.13377  | 0.52868  | C | -5.04645 | -0.03663 | 0.58092  |
| O   | -3.00472 | 0.60914  | -1.83959 | C | -6.60220 | -2.21249 | -0.17705 |
| O   | -2.17982 | 0.19908  | 2.65340  | H | -5.28746 | -2.35742 | -1.87346 |
| N   | -1.83420 | 2.19505  | 1.63263  | C | -6.12479 | -0.43187 | 1.36797  |
| N   | -2.11309 | 2.37510  | -0.72075 | H | -4.42862 | 0.80337  | 0.88705  |
| C   | -1.65081 | 2.90360  | 2.89959  | C | -6.90828 | -1.52021 | 0.99205  |
| H   | -0.65584 | 3.34962  | 2.92799  | H | -7.20134 | -3.06713 | -0.47665 |
| H   | -2.39739 | 3.69346  | 2.99057  | H | -6.35117 | 0.11092  | 2.28067  |
| H   | -1.76842 | 2.17636  | 3.69848  | H | -7.74760 | -1.82902 | 1.60709  |
| C   | -2.33658 | 3.29772  | -1.83472 | C | -2.47435 | 1.91268  | -1.00248 |
| H   | -2.72467 | 2.71822  | -2.66856 | O | -3.01364 | 2.50179  | -1.92362 |
| H   | -3.05603 | 4.06418  | -1.54274 | O | -1.84563 | 2.59355  | -0.00544 |
| H   | -1.39560 | 3.78095  | -2.10042 | C | -1.61872 | 3.98642  | -0.24777 |
| TS4 |          |          |          | C | -0.83028 | 4.52064  | 0.92791  |
|     |          |          |          | H | -2.58478 | 4.48603  | -0.36126 |
|     |          |          |          | H | -1.07077 | 4.09569  | -1.18998 |



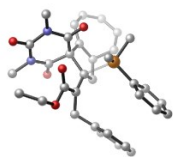

|   |          |          |          |
|---|----------|----------|----------|
| C | 0.53726  | 1.08039  | -1.40964 |
| C | -0.13657 | 0.16870  | -0.37262 |
| H | 0.41838  | 0.59535  | -2.37956 |
| H | 1.61218  | 1.17289  | -1.23452 |
| C | 0.09520  | -1.23578 | -0.51094 |
| C | 0.90932  | -1.78961 | -1.66696 |
| H | 0.74212  | -2.86878 | -1.67770 |
| H | 0.49254  | -1.41646 | -2.61381 |
| C | 2.40758  | -1.56455 | -1.69211 |
| C | 3.01310  | -0.85748 | -2.73217 |
| C | 3.22414  | -2.13783 | -0.71385 |
| C | 4.39929  | -0.72399 | -2.79925 |
| H | 2.38880  | -0.41413 | -3.50504 |
| C | 4.60756  | -2.02441 | -0.78556 |
| H | 2.75733  | -2.68748 | 0.10101  |
| C | 5.20141  | -1.31341 | -1.82816 |
| H | 4.85059  | -0.16965 | -3.61680 |
| H | 5.22723  | -2.48696 | -0.02332 |
| H | 6.28204  | -1.22108 | -1.87988 |
| C | -0.68454 | -2.11198 | 0.29664  |
| O | -1.49000 | -1.75582 | 1.17228  |
| O | -0.48025 | -3.44030 | 0.05974  |
| C | -1.29246 | -4.35200 | 0.80078  |
| C | -2.66774 | -4.50066 | 0.17533  |
| H | -1.37115 | -4.01105 | 1.83591  |
| H | -0.74374 | -5.29646 | 0.77380  |
| H | -3.23245 | -5.28564 | 0.68604  |
| H | -3.22850 | -3.56702 | 0.25765  |
| H | -2.57556 | -4.77311 | -0.87987 |
| P | 0.80806  | 0.82012  | 1.58696  |
| C | 0.32565  | -0.29305 | 2.95815  |
| H | 0.99300  | -0.10852 | 3.80402  |
| H | -0.70472 | -0.08391 | 3.23278  |
| H | 0.39450  | -1.33224 | 2.63784  |
| C | 0.74002  | 2.49983  | 2.35181  |
| H | -0.26003 | 2.90468  | 2.19878  |
| H | 0.95506  | 2.41608  | 3.42093  |
| H | 1.47798  | 3.15533  | 1.88909  |
| C | 2.61790  | 0.51573  | 1.48709  |

|   |          |         |         |
|---|----------|---------|---------|
| H | -0.66910 | 5.59520 | 0.81184 |
| H | -1.36540 | 4.34176 | 1.86337 |
| H | 0.14428  | 4.02879 | 0.99115 |

R2b

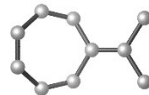

|   |          |          |          |
|---|----------|----------|----------|
| C | 2.46394  | -0.67531 | 0.49992  |
| C | 2.46394  | 0.67531  | 0.49990  |
| C | 1.53026  | 1.53556  | -0.20379 |
| C | 1.53026  | -1.53557 | -0.20377 |
| C | 0.26635  | 1.24885  | -0.56872 |
| C | 0.26636  | -1.24884 | -0.56871 |
| C | -0.47317 | 0.00000  | -0.28184 |
| H | 3.28651  | 1.17792  | 1.00323  |
| H | 1.90351  | 2.52742  | -0.45078 |
| H | -0.27221 | 2.01299  | -1.12608 |
| H | 1.90350  | -2.52743 | -0.45078 |
| H | 3.28650  | -1.17791 | 1.00327  |
| H | -0.27221 | -2.01295 | -1.12611 |
| C | -1.77422 | -0.00000 | 0.07502  |
| C | -2.56268 | -1.26303 | 0.29308  |
| H | -1.94370 | -2.16055 | 0.27992  |
| H | -3.07506 | -1.22393 | 1.26092  |
| H | -3.34403 | -1.37008 | -0.46987 |
| C | -2.56269 | 1.26302  | 0.29311  |
| H | -3.07480 | 1.22404  | 1.26110  |
| H | -1.94377 | 2.16057  | 0.27963  |
| H | -3.34427 | 1.36989  | -0.46963 |

TS2b

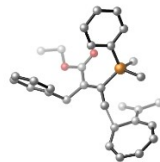

|   |          |          |          |
|---|----------|----------|----------|
| C | -1.30111 | -0.81388 | -1.02011 |
| C | -0.42375 | -0.10841 | -0.16092 |
| H | -0.91406 | -1.71897 | -1.47190 |
| H | -1.98110 | -0.27768 | -1.67069 |
| C | 0.59975  | -0.71046 | 0.58139  |
| C | 0.96205  | -2.16947 | 0.40332  |
| H | 1.14885  | -2.62233 | 1.38111  |

|   |          |          |          |   |          |          |          |
|---|----------|----------|----------|---|----------|----------|----------|
| C | 3.44257  | 1.37483  | 0.74842  | H | 0.12340  | -2.71441 | -0.03944 |
| C | 3.22234  | -0.51522 | 2.21793  | C | 2.19988  | -2.34336 | -0.45876 |
| C | 4.82463  | 1.22286  | 0.75424  | C | 2.19727  | -1.92953 | -1.79562 |
| H | 3.01246  | 2.18875  | 0.17356  | C | 3.37326  | -2.88251 | 0.06932  |
| C | 4.60700  | -0.65522 | 2.24051  | C | 3.33685  | -2.05697 | -2.58418 |
| H | 2.62036  | -1.21027 | 2.79104  | H | 1.29217  | -1.49682 | -2.21725 |
| C | 5.41187  | 0.21417  | 1.51293  | C | 4.51696  | -3.01263 | -0.71653 |
| H | 5.44154  | 1.89834  | 0.17076  | H | 3.38913  | -3.18958 | 1.11165  |
| H | 5.05465  | -1.45211 | 2.82628  | C | 4.50256  | -2.60086 | -2.04612 |
| H | 6.49129  | 0.10120  | 1.52722  | H | 3.31478  | -1.73468 | -3.62081 |
| C | 0.02752  | 4.80926  | -0.66702 | H | 5.42110  | -3.43380 | -0.28729 |
| C | -1.30889 | 5.22960  | -1.04735 | H | 5.39220  | -2.70138 | -2.65952 |
| C | -2.42414 | 4.46327  | -1.00798 | C | 1.42918  | 0.07615  | 1.45689  |
| C | 0.51945  | 3.56425  | -0.77266 | O | 1.32220  | 1.28946  | 1.65386  |
| C | -2.49648 | 3.07429  | -0.59619 | O | 2.39011  | -0.64538 | 2.07364  |
| C | -0.20343 | 2.42682  | -1.44612 | C | 3.29550  | 0.09144  | 2.89895  |
| C | -1.50848 | 2.17528  | -0.72939 | C | 4.38346  | -0.86969 | 3.32722  |
| H | -1.43483 | 6.28422  | -1.28043 | H | 2.75053  | 0.50185  | 3.75539  |
| H | -3.37557 | 4.94932  | -1.21027 | H | 3.69542  | 0.93379  | 2.32752  |
| H | -3.43912 | 2.75344  | -0.15297 | H | 5.10650  | -0.35928 | 3.96763  |
| H | 1.52253  | 3.37178  | -0.40017 | H | 3.95843  | -1.70897 | 3.88311  |
| H | 0.67560  | 5.58270  | -0.26006 | H | 4.90636  | -1.26239 | 2.45172  |
| H | -0.42067 | 2.71379  | -2.48444 | P | -0.70580 | 1.68046  | -0.04265 |
| C | -1.61779 | 0.71713  | -0.30356 | C | -1.12729 | 2.42922  | 1.56570  |
| C | -2.37355 | 0.63392  | 1.00599  | H | -2.13502 | 2.84376  | 1.51454  |
| C | -2.28918 | -0.03703 | -1.45888 | H | -1.07090 | 1.66646  | 2.34019  |
| C | -3.97989 | -0.94525 | 0.06617  | H | -0.39189 | 3.20156  | 1.79208  |
| O | -4.89697 | -1.71197 | 0.26987  | C | -2.09904 | 2.12191  | -1.12317 |
| O | -1.98693 | 1.22948  | 1.99330  | H | -3.00843 | 1.59706  | -0.81763 |
| O | -1.92716 | 0.10178  | -2.61004 | H | -2.24754 | 3.20140  | -1.03518 |
| N | -3.29020 | -0.93218 | -1.14256 | H | -1.86735 | 1.88278  | -2.16165 |
| N | -3.60840 | 0.01038  | 1.00873  | C | 0.68317  | 2.57637  | -0.79782 |
| C | -3.72727 | -1.82963 | -2.21258 | C | 0.65261  | 3.97291  | -0.81783 |
| H | -4.44301 | -2.53067 | -1.79292 | C | 1.73100  | 1.89128  | -1.41462 |
| H | -4.18268 | -1.25471 | -3.02064 | C | 1.67073  | 4.68172  | -1.44879 |
| H | -2.85378 | -2.35686 | -2.59987 | H | -0.15855 | 4.51656  | -0.33877 |
| C | -4.30759 | -0.05027 | 2.29243  | C | 2.74448  | 2.60540  | -2.04649 |
| H | -4.21354 | 0.91980  | 2.77450  | H | 1.76500  | 0.80605  | -1.38632 |
| H | -5.34967 | -0.29339 | 2.10475  | C | 2.71600  | 3.99782  | -2.06475 |
| H | -3.85625 | -0.81957 | 2.92520  | H | 1.64665  | 5.76627  | -1.45805 |
| P |          |          |          | H | 3.56025  | 2.06853  | -2.51938 |
|   |          |          |          | H | 3.50916  | 4.55095  | -2.55698 |
|   |          |          |          | C | -4.09288 | -2.89743 | -1.62934 |
|   |          |          |          | C | -4.94045 | -1.89836 | -2.05506 |

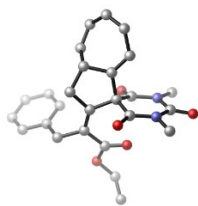

|   |          |          |          |
|---|----------|----------|----------|
| C | 0.57432  | 1.60830  | -1.68425 |
| C | 0.31043  | 0.28394  | -1.00975 |
| H | 0.40656  | 1.48008  | -2.76116 |
| H | 1.60484  | 1.94673  | -1.54186 |
| C | 1.20499  | -0.70988 | -0.92338 |
| C | 2.61238  | -0.55019 | -1.44246 |
| H | 3.02885  | -1.53436 | -1.67267 |
| H | 2.58249  | 0.00121  | -2.38893 |
| C | 3.55848  | 0.16812  | -0.48829 |
| C | 4.89514  | 0.32594  | -0.86898 |
| C | 3.14429  | 0.68580  | 0.74034  |
| C | 5.79876  | 0.98816  | -0.04647 |
| H | 5.22723  | -0.07550 | -1.82376 |
| C | 4.05211  | 1.35051  | 1.56615  |
| H | 2.11203  | 0.57240  | 1.06293  |
| C | 5.37829  | 1.50516  | 1.17854  |
| H | 6.83175  | 1.10138  | -0.36074 |
| H | 3.71363  | 1.74450  | 2.51962  |
| H | 6.08135  | 2.02243  | 1.82359  |
| C | 0.83687  | -1.97394 | -0.23303 |
| O | -0.30274 | -2.32008 | 0.02665  |
| O | 1.90776  | -2.70480 | 0.08200  |
| C | 1.65919  | -3.94925 | 0.76310  |
| C | 1.24865  | -5.03115 | -0.21669 |
| H | 0.89097  | -3.78517 | 1.52161  |
| H | 2.60664  | -4.18308 | 1.25000  |
| H | 1.12969  | -5.98094 | 0.31050  |
| H | 0.29860  | -4.77603 | -0.68969 |
| H | 2.01111  | -5.15730 | -0.98874 |
| C | -0.74201 | 4.35084  | 0.60689  |
| C | -2.12733 | 4.58724  | 0.25227  |
| C | -3.03352 | 3.63819  | -0.11090 |
| C | 0.03415  | 3.38876  | 0.07268  |
| C | -2.75955 | 2.22046  | -0.20363 |
| C | -0.44946 | 2.58839  | -1.10593 |
| C | -1.56021 | 1.72866  | -0.56324 |
| H | -2.50826 | 5.59096  | 0.42705  |
| H | -4.07328 | 3.94371  | -0.19731 |

|   |          |          |          |
|---|----------|----------|----------|
| C | -5.14047 | -0.63722 | -1.43056 |
| C | -3.13811 | -2.85303 | -0.60184 |
| C | -4.60396 | -0.11190 | -0.28636 |
| C | -2.69308 | -1.74529 | 0.14504  |
| C | -3.55926 | -0.61114 | 0.58926  |
| H | -5.56641 | -2.10896 | -2.91734 |
| H | -5.89907 | -0.01426 | -1.90237 |
| H | -5.04213 | 0.83518  | 0.01684  |
| H | -2.53133 | -3.74998 | -0.49063 |
| H | -4.14793 | -3.83837 | -2.17448 |
| H | -1.95597 | -2.02098 | 0.89599  |
| C | -3.31963 | -0.02296 | 1.79897  |
| C | -4.17177 | 1.12783  | 2.29362  |
| H | -4.28316 | 1.92818  | 1.55197  |
| H | -5.18772 | 0.80489  | 2.55535  |
| H | -3.73306 | 1.57895  | 3.18722  |
| C | -2.33774 | -0.59980 | 2.79957  |
| H | -2.33074 | -0.00396 | 3.71605  |
| H | -2.61049 | -1.62374 | 3.08578  |
| H | -1.30551 | -0.64638 | 2.42890  |

M2b

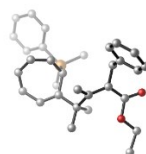

|   |          |          |          |
|---|----------|----------|----------|
| C | -2.60017 | 1.13910  | 1.96489  |
| C | -3.42480 | -0.00509 | 2.30205  |
| C | -2.99050 | -1.29005 | 2.34711  |
| C | -1.56913 | 1.11694  | 1.10412  |
| C | -1.64612 | -1.76343 | 2.06541  |
| C | -1.21264 | -0.08792 | 0.27613  |
| C | -0.78013 | -1.23351 | 1.17857  |
| H | -4.43325 | 0.20245  | 2.65178  |
| H | -3.68148 | -2.03142 | 2.74472  |
| H | -1.32305 | -2.62871 | 2.63925  |
| H | -0.92313 | 1.98293  | 0.99199  |
| H | -2.83111 | 2.07455  | 2.46887  |
| H | -0.35769 | 0.16294  | -0.36316 |
| C | 0.64568  | -1.72820 | 0.93563  |
| P | -2.51189 | -0.51649 | -0.98666 |
| C | -2.90975 | -2.27982 | -1.04857 |
| H | -1.99620 | -2.82883 | -1.28026 |

|      |          |          |          |   |          |          |          |
|------|----------|----------|----------|---|----------|----------|----------|
| H    | -3.55973 | 1.54073  | 0.08670  | H | -3.29355 | -2.61575 | -0.08471 |
| H    | 1.02446  | 3.18056  | 0.47498  | H | -3.64736 | -2.44508 | -1.83713 |
| H    | -0.32512 | 4.99272  | 1.37950  | C | -1.76234 | -0.08215 | -2.58006 |
| H    | -0.85048 | 3.27414  | -1.86213 | H | -1.51807 | 0.98281  | -2.58717 |
| C    | -1.10090 | 0.27172  | -0.43522 | H | -0.83574 | -0.64735 | -2.70856 |
| C    | -1.10872 | -0.06720 | 1.04777  | H | -2.45546 | -0.30278 | -3.39376 |
| C    | -2.00818 | -0.59863 | -1.28668 | C | -4.04597 | 0.42710  | -0.86937 |
| C    | -3.18965 | -1.33425 | 0.74010  | C | -5.25050 | -0.20756 | -0.55541 |
| O    | -4.07686 | -1.99067 | 1.24207  | C | -4.01776 | 1.80723  | -1.09590 |
| O    | -0.20675 | 0.26310  | 1.78760  | C | -6.42328 | 0.53639  | -0.47658 |
| O    | -1.86312 | -0.68628 | -2.48610 | H | -5.27956 | -1.27521 | -0.36184 |
| N    | -3.07327 | -1.20112 | -0.64295 | C | -5.19284 | 2.54535  | -1.01074 |
| N    | -2.25941 | -0.66119 | 1.53130  | H | -3.08416 | 2.31386  | -1.32354 |
| C    | -4.00096 | -1.96383 | -1.48018 | C | -6.39394 | 1.91028  | -0.70245 |
| H    | -4.88386 | -2.19055 | -0.89011 | H | -7.35827 | 0.04184  | -0.23695 |
| H    | -4.25671 | -1.36017 | -2.34923 | H | -5.16929 | 3.61556  | -1.18398 |
| H    | -3.52776 | -2.88910 | -1.81621 | H | -7.30978 | 2.48846  | -0.63877 |
| C    | -2.35610 | -0.87084 | 2.97676  | C | 1.48426  | 0.39438  | 1.88453  |
| H    | -1.86407 | -0.03565 | 3.46909  | C | 1.54848  | -0.45109 | 0.83275  |
| H    | -3.40713 | -0.92098 | 3.24855  | H | 0.82977  | 0.20871  | 2.73354  |
| H    | -1.86024 | -1.80285 | 3.25905  | H | 2.08346  | 1.29833  | 1.91139  |
|      |          |          |          | C | 2.21288  | -0.09668 | -0.41615 |
|      |          |          |          | C | 2.15627  | 1.33691  | -0.90306 |
|      |          |          |          | H | 2.28490  | 1.31969  | -1.99275 |
|      |          |          |          | H | 1.16559  | 1.77252  | -0.69361 |
|      |          |          |          | C | 3.19997  | 2.28882  | -0.34021 |
|      |          |          |          | C | 2.84202  | 3.44353  | 0.35750  |
|      |          |          |          | C | 4.56240  | 2.01819  | -0.52274 |
|      |          |          |          | C | 3.80973  | 4.30950  | 0.86716  |
|      |          |          |          | H | 1.78647  | 3.66030  | 0.51377  |
|      |          |          |          | C | 5.52994  | 2.88093  | -0.02006 |
|      |          |          |          | H | 4.84238  | 1.12475  | -1.07453 |
|      |          |          |          | C | 5.15924  | 4.03108  | 0.67854  |
|      |          |          |          | H | 3.50806  | 5.19863  | 1.41376  |
|      |          |          |          | H | 6.58200  | 2.65803  | -0.17390 |
|      |          |          |          | H | 5.91679  | 4.70181  | 1.07239  |
|      |          |          |          | C | 3.13487  | -0.92385 | -1.07629 |
|      |          |          |          | O | 3.72448  | -0.71487 | -2.15063 |
|      |          |          |          | O | 3.44009  | -2.09271 | -0.37118 |
|      |          |          |          | C | 4.24982  | -3.02489 | -1.06662 |
|      |          |          |          | C | 4.44301  | -4.21966 | -0.15297 |
| TS1' |          |          |          | H | 5.20689  | -2.56372 | -1.33185 |

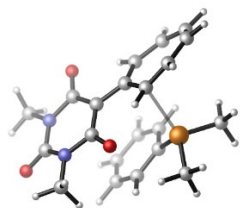

|   |          |          |          |
|---|----------|----------|----------|
| C | -4.11289 | 1.51796  | -1.15097 |
| C | -3.89408 | 2.25699  | 0.01495  |
| C | -2.65810 | 2.49063  | 0.60074  |
| C | -3.20337 | 0.71755  | -1.80972 |
| C | -1.36562 | 2.09794  | 0.23723  |
| C | -1.87863 | 0.34996  | -1.46036 |
| C | -0.91536 | 1.15034  | -0.70507 |
| H | -4.75171 | 2.75070  | 0.46188  |
| H | -2.68167 | 3.14403  | 1.47104  |
| H | -0.58620 | 2.56767  | 0.81841  |
| H | -3.57785 | 0.20814  | -2.69445 |
| H | -5.11116 | 1.56623  | -1.58018 |
| H | -1.41382 | -0.31138 | -2.17772 |
| C | 0.48968  | 0.85971  | -0.83999 |
| C | 1.47592  | 1.78608  | -0.30280 |
| C | 0.96443  | -0.38873 | -1.40208 |
| C | 3.27504  | 0.13521  | -0.68617 |
| O | 4.42763  | -0.23632 | -0.52751 |
| O | 1.25545  | 2.92415  | 0.10588  |
| O | 0.27290  | -1.29749 | -1.88324 |
| N | 2.34609  | -0.63269 | -1.36638 |
| N | 2.81093  | 1.34880  | -0.23206 |
| C | 2.80452  | -1.91813 | -1.88337 |
| H | 2.59441  | -2.72034 | -1.16800 |
| H | 2.27617  | -2.12992 | -2.80986 |
| H | 3.87632  | -1.85378 | -2.04789 |
| C | 3.75470  | 2.25230  | 0.41782  |
| H | 3.46655  | 2.40206  | 1.46071  |
| H | 4.74181  | 1.80370  | 0.35778  |
| H | 3.73597  | 3.21939  | -0.08482 |
| P | -1.96959 | -1.56740 | 0.11734  |
| C | -1.82266 | -3.29013 | -0.49200 |
| H | -2.72549 | -3.53495 | -1.05625 |
| H | -0.96506 | -3.34031 | -1.16548 |
| H | -1.70527 | -4.00194 | 0.32949  |
| C | -3.51730 | -1.56323 | 1.10875  |
| H | -3.60742 | -0.61713 | 1.64647  |

|   |          |          |          |
|---|----------|----------|----------|
| H | 4.90641  | -3.90692 | 0.78647  |
| H | 3.48190  | -4.68763 | 0.08163  |
| C | 1.16097  | -2.63887 | 2.05338  |
| H | 2.20337  | -2.88276 | 1.83260  |
| H | 1.11979  | -2.13872 | 3.02415  |
| H | 0.59277  | -3.57458 | 2.11247  |
| C | 0.55910  | -2.56276 | -0.35758 |
| H | -0.17803 | -3.36108 | -0.21550 |
| H | 0.27838  | -1.94970 | -1.22040 |
| H | 1.52234  | -3.01434 | -0.58558 |

TS1b'

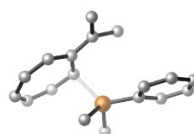

|   |          |          |          |
|---|----------|----------|----------|
| C | -3.59281 | -1.23352 | -0.35976 |
| C | -4.02470 | -0.40700 | 0.66144  |
| C | -3.45020 | 0.83992  | 1.00701  |
| C | -2.48477 | -1.10078 | -1.20060 |
| C | -2.35812 | 1.50995  | 0.51647  |
| C | -1.36359 | -0.21204 | -1.11984 |
| C | -1.35646 | 1.15058  | -0.47225 |
| H | -4.92167 | -0.69704 | 1.19985  |
| H | -3.98112 | 1.37884  | 1.79165  |
| H | -2.19670 | 2.48220  | 0.97075  |
| H | -2.39505 | -1.84951 | -1.98427 |
| H | -4.22211 | -2.09812 | -0.57276 |
| H | -0.81759 | -0.20050 | -2.06092 |
| C | -0.33498 | 2.01072  | -0.75959 |
| P | 0.08369  | -1.16375 | 0.08066  |
| C | 0.08070  | -2.93412 | -0.36020 |
| H | -0.96460 | -3.24783 | -0.40972 |
| H | 0.53555  | -3.08578 | -1.34151 |
| H | 0.61135  | -3.52715 | 0.38701  |
| C | -0.66485 | -1.06870 | 1.73408  |
| H | -0.79329 | -0.01887 | 2.01000  |
| H | -1.66316 | -1.51228 | 1.67461  |
| H | -0.05135 | -1.59016 | 2.47118  |
| C | 1.82725  | -0.68680 | 0.27615  |
| C | 2.82656  | -1.23928 | -0.53486 |
| C | 2.15559  | 0.36933  | 1.13792  |
| C | 4.13032  | -0.75694 | -0.47161 |

|                                                                                   |          |          |          |                                                                                     |          |          |          |
|-----------------------------------------------------------------------------------|----------|----------|----------|-------------------------------------------------------------------------------------|----------|----------|----------|
| H                                                                                 | -4.36388 | -1.63502 | 0.42051  | H                                                                                   | 2.59333  | -2.05191 | -1.21675 |
| H                                                                                 | -3.55093 | -2.39491 | 1.81674  | C                                                                                   | 3.46052  | 0.84499  | 1.20071  |
| C                                                                                 | -0.61436 | -1.33707 | 1.29670  | H                                                                                   | 1.38547  | 0.82935  | 1.75081  |
| C                                                                                 | 0.60003  | -2.01651 | 1.11873  | C                                                                                   | 4.45152  | 0.28340  | 0.39657  |
| C                                                                                 | -0.67696 | -0.29199 | 2.22839  | H                                                                                   | 4.89696  | -1.19742 | -1.10097 |
| C                                                                                 | 1.73506  | -1.62558 | 1.81858  | H                                                                                   | 3.70419  | 1.65827  | 1.87676  |
| H                                                                                 | 0.67018  | -2.81901 | 0.39054  | H                                                                                   | 5.46862  | 0.65799  | 0.44504  |
| C                                                                                 | 0.46116  | 0.09226  | 2.93337  | C                                                                                   | -0.26359 | 3.38417  | -0.12494 |
| H                                                                                 | -1.60706 | 0.24595  | 2.38632  | H                                                                                   | 0.57174  | 3.95409  | -0.53935 |
| C                                                                                 | 1.67185  | -0.55953 | 2.71644  | H                                                                                   | -1.17638 | 3.96569  | -0.29300 |
| H                                                                                 | 2.67725  | -2.13897 | 1.64931  | H                                                                                   | -0.11386 | 3.32903  | 0.96074  |
| H                                                                                 | 0.40317  | 0.91335  | 3.64074  | C                                                                                   | 0.78873  | 1.76372  | -1.73572 |
| H                                                                                 | 2.56414  | -0.24428 | 3.24774  | H                                                                                   | 0.73762  | 2.48689  | -2.56059 |
| TS1'-a                                                                            |          |          |          | H                                                                                   | 1.75730  | 1.91963  | -1.24214 |
| 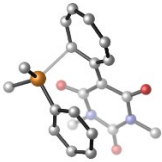 |          |          |          | H                                                                                   | 0.81673  | 0.76524  | -2.17217 |
| C                                                                                 | -4.11289 | 1.51796  | -1.15097 | M1b'                                                                                |          |          |          |
| C                                                                                 | -3.89408 | 2.25699  | 0.01495  |  |          |          |          |
| C                                                                                 | -2.65810 | 2.49063  | 0.60074  | C                                                                                   | 3.60253  | -0.64072 | 0.40136  |
| C                                                                                 | -3.20337 | 0.71755  | -1.80972 | C                                                                                   | 3.76606  | 0.07212  | -0.80036 |
| C                                                                                 | -1.36562 | 2.09794  | 0.23723  | C                                                                                   | 2.88980  | 1.05276  | -1.28653 |
| C                                                                                 | -1.87863 | 0.34996  | -1.46036 | C                                                                                   | 2.51915  | -0.71322 | 1.24107  |
| C                                                                                 | -0.91536 | 1.15034  | -0.70507 | C                                                                                   | 1.71076  | 1.57973  | -0.78575 |
| H                                                                                 | -4.75171 | 2.75070  | 0.46188  | C                                                                                   | 1.14753  | -0.15804 | 1.01542  |
| H                                                                                 | -2.68167 | 3.14403  | 1.47104  | C                                                                                   | 0.95776  | 1.23010  | 0.40258  |
| H                                                                                 | -0.58620 | 2.56767  | 0.81841  | H                                                                                   | 4.68312  | -0.09359 | -1.35662 |
| H                                                                                 | -3.57785 | 0.20814  | -2.69445 | H                                                                                   | 3.20435  | 1.50907  | -2.22720 |
| H                                                                                 | -5.11116 | 1.56623  | -1.58018 | H                                                                                   | 1.27676  | 2.38174  | -1.37681 |
| H                                                                                 | -1.41382 | -0.31138 | -2.17772 | H                                                                                   | 2.63516  | -1.25517 | 2.17508  |
| C                                                                                 | 0.48968  | 0.85971  | -0.83999 | H                                                                                   | 4.47126  | -1.21367 | 0.73152  |
| C                                                                                 | 1.47592  | 1.78608  | -0.30280 | H                                                                                   | 0.62340  | -0.19612 | 1.97425  |
| C                                                                                 | 0.96443  | -0.38873 | -1.40208 | C                                                                                   | -0.01156 | 2.04746  | 0.90377  |
| C                                                                                 | 3.27504  | 0.13521  | -0.68617 | P                                                                                   | 0.17937  | -1.37302 | 0.00266  |
| O                                                                                 | 4.42763  | -0.23632 | -0.52751 | C                                                                                   | 0.13039  | -2.95054 | 0.89257  |
| O                                                                                 | 1.25545  | 2.92415  | 0.10588  | H                                                                                   | 1.16348  | -3.27789 | 1.02493  |
| O                                                                                 | 0.27290  | -1.29749 | -1.88324 | H                                                                                   | -0.32370 | -2.81146 | 1.87632  |
| N                                                                                 | 2.34609  | -0.63269 | -1.36638 | H                                                                                   | -0.42900 | -3.69816 | 0.32698  |
| N                                                                                 | 2.81093  | 1.34880  | -0.23206 | C                                                                                   | 0.97638  | -1.65739 | -1.59201 |
| C                                                                                 | 2.80452  | -1.91813 | -1.88337 | H                                                                                   | 0.93990  | -0.73018 | -2.16718 |
| H                                                                                 | 2.59441  | -2.72034 | -1.16800 | H                                                                                   | 2.02552  | -1.89957 | -1.40781 |
| H                                                                                 | 2.27617  | -2.12992 | -2.80986 |                                                                                     |          |          |          |

|                                                                                     |          |          |          |                                                                                      |          |          |          |
|-------------------------------------------------------------------------------------|----------|----------|----------|--------------------------------------------------------------------------------------|----------|----------|----------|
| H                                                                                   | 3.87632  | -1.85378 | -2.04789 | H                                                                                    | 0.46297  | -2.46496 | -2.11755 |
| C                                                                                   | 3.75470  | 2.25230  | 0.41782  | C                                                                                    | -1.51715 | -0.82935 | -0.30799 |
| H                                                                                   | 3.46655  | 2.40206  | 1.46071  | C                                                                                    | -2.60389 | -1.39021 | 0.36812  |
| H                                                                                   | 4.74181  | 1.80370  | 0.35778  | C                                                                                    | -1.71696 | 0.25773  | -1.17215 |
| H                                                                                   | 3.73597  | 3.21939  | -0.08482 | C                                                                                    | -3.88379 | -0.87372 | 0.17897  |
| P                                                                                   | -1.96959 | -1.56740 | 0.11734  | H                                                                                    | -2.46149 | -2.22875 | 1.04297  |
| C                                                                                   | -1.82266 | -3.29013 | -0.49200 | C                                                                                    | -2.99638 | 0.76879  | -1.35349 |
| H                                                                                   | -2.72549 | -3.53495 | -1.05625 | H                                                                                    | -0.87111 | 0.71654  | -1.67820 |
| H                                                                                   | -0.96506 | -3.34031 | -1.16548 | C                                                                                    | -4.07934 | 0.20388  | -0.67922 |
| H                                                                                   | -1.70527 | -4.00194 | 0.32949  | H                                                                                    | -4.72492 | -1.31466 | 0.70332  |
| C                                                                                   | -3.51730 | -1.56323 | 1.10875  | H                                                                                    | -3.14906 | 1.61023  | -2.02121 |
| H                                                                                   | -3.60742 | -0.61713 | 1.64647  | H                                                                                    | -5.07640 | 0.60694  | -0.82404 |
| H                                                                                   | -4.36388 | -1.63502 | 0.42051  | C                                                                                    | -0.18999 | 3.44297  | 0.35914  |
| H                                                                                   | -3.55093 | -2.39491 | 1.81674  | H                                                                                    | 0.76546  | 3.90759  | 0.10422  |
| C                                                                                   | -0.61436 | -1.33707 | 1.29670  | H                                                                                    | -0.80957 | 3.44514  | -0.55197 |
| C                                                                                   | 0.60003  | -2.01651 | 1.11873  | H                                                                                    | -0.69967 | 4.08233  | 1.08749  |
| C                                                                                   | -0.67696 | -0.29199 | 2.22839  | C                                                                                    | -1.07557 | 1.67798  | 1.90539  |
| C                                                                                   | 1.73506  | -1.62558 | 1.81858  | H                                                                                    | -2.06760 | 1.77837  | 1.43812  |
| H                                                                                   | 0.67018  | -2.81901 | 0.39054  | H                                                                                    | -1.01952 | 0.65960  | 2.29316  |
| C                                                                                   | 0.46116  | 0.09226  | 2.93337  | H                                                                                    | -1.06432 | 2.36009  | 2.76503  |
| H                                                                                   | -1.60706 | 0.24595  | 2.38632  | TS2b'                                                                                |          |          |          |
| C                                                                                   | 1.67185  | -0.55953 | 2.71644  | 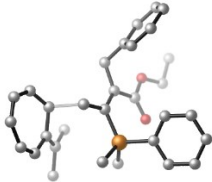 |          |          |          |
| H                                                                                   | 2.67725  | -2.13897 | 1.64931  |                                                                                      |          |          |          |
| H                                                                                   | 0.40317  | 0.91335  | 3.64074  |                                                                                      |          |          |          |
| H                                                                                   | 2.56414  | -0.24428 | 3.24774  |                                                                                      |          |          |          |
| M1'                                                                                 |          |          |          |                                                                                      |          |          |          |
|  |          |          |          | C                                                                                    | -1.30111 | -0.81388 | -1.02011 |
|                                                                                     |          |          |          | C                                                                                    | -0.42375 | -0.10841 | -0.16092 |
|                                                                                     |          |          |          | H                                                                                    | -0.91406 | -1.71897 | -1.47190 |
|                                                                                     |          |          |          | H                                                                                    | -1.98110 | -0.27768 | -1.67069 |
| C                                                                                   | 2.35312  | -3.20605 | -0.80206 | C                                                                                    | 0.59975  | -0.71046 | 0.58139  |
| C                                                                                   | 2.67167  | -3.00204 | 0.58539  | C                                                                                    | 0.96205  | -2.16947 | 0.40332  |
| C                                                                                   | 1.86667  | -2.35645 | 1.47741  | H                                                                                    | 1.14885  | -2.62233 | 1.38111  |
| C                                                                                   | 1.53775  | -2.43317 | -1.54817 | H                                                                                    | 0.12340  | -2.71441 | -0.03944 |
| C                                                                                   | 0.59199  | -1.73301 | 1.26801  | C                                                                                    | 2.19988  | -2.34336 | -0.45876 |
| C                                                                                   | 0.94292  | -1.11838 | -1.13808 | C                                                                                    | 2.19727  | -1.92953 | -1.79562 |
| C                                                                                   | 0.07996  | -1.19868 | 0.12002  | C                                                                                    | 3.37326  | -2.88251 | 0.06932  |
| H                                                                                   | 3.55174  | -3.50900 | 0.97268  | C                                                                                    | 3.33685  | -2.05697 | -2.58418 |
| H                                                                                   | 2.18089  | -2.39690 | 2.51981  | H                                                                                    | 1.29217  | -1.49682 | -2.21725 |
| H                                                                                   | -0.03915 | -1.66163 | 2.14644  | C                                                                                    | 4.51696  | -3.01263 | -0.71653 |
| H                                                                                   | 1.28124  | -2.76639 | -2.55020 | H                                                                                    | 3.38913  | -3.18958 | 1.11165  |
|                                                                                     |          |          |          | C                                                                                    | 4.50256  | -2.60086 | -2.04612 |

|       |          |          |          |   |          |          |          |
|-------|----------|----------|----------|---|----------|----------|----------|
| H     | 2.78147  | -4.08707 | -1.27646 | H | 3.31478  | -1.73468 | -3.62081 |
| H     | 0.30699  | -0.77012 | -1.95096 | H | 5.42110  | -3.43380 | -0.28729 |
| C     | -1.26855 | -0.67256 | 0.02135  | H | 5.39220  | -2.70138 | -2.65952 |
| C     | -2.33398 | -1.25947 | 0.79041  | C | 1.42918  | 0.07615  | 1.45689  |
| C     | -1.51840 | 0.45795  | -0.80499 | O | 1.32220  | 1.28946  | 1.65386  |
| C     | -3.91745 | 0.33576  | -0.26827 | O | 2.39011  | -0.64538 | 2.07364  |
| O     | -5.06064 | 0.75067  | -0.40187 | C | 3.29550  | 0.09144  | 2.89895  |
| O     | -2.22003 | -2.18409 | 1.59220  | C | 4.38346  | -0.86969 | 3.32722  |
| O     | -0.64845 | 1.10710  | -1.42617 | H | 2.75053  | 0.50185  | 3.75539  |
| N     | -2.84159 | 0.89536  | -0.93822 | H | 3.69542  | 0.93379  | 2.32752  |
| N     | -3.62581 | -0.71385 | 0.57267  | H | 5.10650  | -0.35928 | 3.96763  |
| C     | -3.08204 | 2.04938  | -1.79519 | H | 3.95843  | -1.70897 | 3.88311  |
| H     | -4.15546 | 2.20761  | -1.84613 | H | 4.90636  | -1.26239 | 2.45172  |
| H     | -2.58836 | 2.93275  | -1.38379 | P | -0.70580 | 1.68046  | -0.04265 |
| H     | -2.67294 | 1.85908  | -2.78813 | C | -1.12729 | 2.42922  | 1.56570  |
| C     | -4.76337 | -1.27971 | 1.28886  | H | -2.13502 | 2.84376  | 1.51454  |
| H     | -5.27107 | -0.49648 | 1.85412  | H | -1.07090 | 1.66646  | 2.34019  |
| H     | -5.47623 | -1.70904 | 0.58184  | H | -0.39189 | 3.20156  | 1.79208  |
| H     | -4.37875 | -2.04735 | 1.95371  | C | -2.09904 | 2.12191  | -1.12317 |
| P     | 2.17569  | 0.27589  | -1.06136 | H | -3.00843 | 1.59706  | -0.81763 |
| C     | 2.07881  | 1.20299  | -2.61389 | H | -2.24754 | 3.20140  | -1.03518 |
| H     | 2.30682  | 0.50912  | -3.42782 | H | -1.86735 | 1.88278  | -2.16165 |
| H     | 1.06781  | 1.59064  | -2.73392 | C | 0.68317  | 2.57637  | -0.79782 |
| H     | 2.81540  | 2.00916  | -2.60962 | C | 0.65261  | 3.97291  | -0.81783 |
| C     | 3.88993  | -0.32590 | -1.00917 | C | 1.73100  | 1.89128  | -1.41462 |
| H     | 4.07778  | -0.88235 | -0.09172 | C | 1.67073  | 4.68172  | -1.44879 |
| H     | 4.05675  | -0.98901 | -1.85977 | H | -0.15855 | 4.51656  | -0.33877 |
| H     | 4.55585  | 0.53777  | -1.07255 | C | 2.74448  | 2.60540  | -2.04649 |
| C     | 1.98359  | 1.39283  | 0.34264  | H | 1.76500  | 0.80605  | -1.38632 |
| C     | 1.30984  | 2.60956  | 0.20021  | C | 2.71600  | 3.99782  | -2.06475 |
| C     | 2.54726  | 1.04039  | 1.57353  | H | 1.64665  | 5.76627  | -1.45805 |
| C     | 1.21827  | 3.47438  | 1.28625  | H | 3.56025  | 2.06853  | -2.51938 |
| H     | 0.83518  | 2.86243  | -0.74077 | H | 3.50916  | 4.55095  | -2.55698 |
| C     | 2.44451  | 1.90781  | 2.65474  | C | -4.09288 | -2.89743 | -1.62934 |
| H     | 3.05001  | 0.08527  | 1.69723  | C | -4.94045 | -1.89836 | -2.05506 |
| C     | 1.78459  | 3.12611  | 2.50954  | C | -5.14047 | -0.63722 | -1.43056 |
| H     | 0.69691  | 4.41922  | 1.17646  | C | -3.13811 | -2.85303 | -0.60184 |
| H     | 2.87735  | 1.63065  | 3.60994  | C | -4.60396 | -0.11190 | -0.28636 |
| H     | 1.70662  | 3.80280  | 3.35432  | C | -2.69308 | -1.74529 | 0.14504  |
| MI'-a |          |          |          | C | -3.55926 | -0.61114 | 0.58926  |



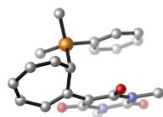

|   |          |          |          |
|---|----------|----------|----------|
| C | -4.45725 | 0.11674  | 0.98979  |
| C | -4.63029 | -1.08704 | 0.19776  |
| C | -3.67794 | -2.01223 | -0.05519 |
| C | -3.31031 | 0.73412  | 1.31430  |
| C | -2.27672 | -2.03114 | 0.31542  |
| C | -1.91379 | 0.42045  | 0.85037  |
| C | -1.45966 | -1.02166 | 0.70377  |
| H | -5.64049 | -1.29502 | -0.14372 |
| H | -4.00149 | -2.89968 | -0.59569 |
| H | -1.78478 | -2.98608 | 0.16462  |
| H | -3.37771 | 1.59552  | 1.97484  |
| H | -5.37116 | 0.54408  | 1.39863  |
| H | -1.21990 | 0.89111  | 1.55592  |
| C | 0.00052  | -1.18632 | 0.70484  |
| C | 0.60944  | -1.86158 | -0.40176 |
| C | 0.80000  | -0.46315 | 1.64288  |
| C | 2.83107  | -1.12421 | 0.39808  |
| O | 4.04520  | -1.05992 | 0.25060  |
| O | 0.02343  | -2.40567 | -1.35012 |
| O | 0.36192  | 0.18486  | 2.60457  |
| N | 2.19595  | -0.46864 | 1.42934  |
| N | 2.01935  | -1.84769 | -0.45267 |
| C | 3.06137  | 0.25060  | 2.35490  |
| H | 3.64619  | -0.45116 | 2.95513  |
| H | 3.75047  | 0.87871  | 1.78954  |
| H | 2.42380  | 0.85224  | 2.99661  |
| C | 2.65252  | -2.50386 | -1.58850 |
| H | 2.58786  | -1.87855 | -2.48599 |
| H | 3.69694  | -2.67641 | -1.34253 |
| H | 2.13246  | -3.43907 | -1.78471 |
| P | -1.46952 | 1.24129  | -0.75460 |
| C | -2.40319 | 2.78795  | -0.90590 |
| H | -3.47059 | 2.56051  | -0.86455 |
| H | -2.14931 | 3.45641  | -0.08028 |
| H | -2.15681 | 3.27142  | -1.85293 |
| C | -1.89024 | 0.17144  | -2.14385 |
| H | -1.34925 | -0.77862 | -2.04624 |
| H | -2.96389 | -0.02810 | -2.09193 |
| H | -1.64520 | 0.67125  | -3.08357 |

|   |          |          |          |
|---|----------|----------|----------|
| H | -4.14793 | -3.83837 | -2.17448 |
| H | -1.95597 | -2.02098 | 0.89599  |
| C | -3.31963 | -0.02296 | 1.79897  |
| C | -4.17177 | 1.12783  | 2.29362  |
| H | -4.28316 | 1.92818  | 1.55197  |
| H | -5.18772 | 0.80489  | 2.55535  |
| H | -3.73306 | 1.57895  | 3.18722  |
| C | -2.33774 | -0.59980 | 2.79957  |
| H | -2.33074 | -0.00396 | 3.71605  |
| H | -2.61049 | -1.62374 | 3.08578  |
| H | -1.30551 | -0.64638 | 2.42890  |

M2b'

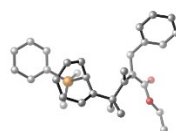

|   |          |          |          |
|---|----------|----------|----------|
| C | -2.60083 | 1.13008  | 1.95334  |
| C | -3.42391 | -0.01649 | 2.28503  |
| C | -2.98849 | -1.30093 | 2.32880  |
| C | -1.56577 | 1.11137  | 1.09748  |
| C | -1.64335 | -1.77337 | 2.05023  |
| C | -1.20530 | -0.09160 | 0.26844  |
| C | -0.77451 | -1.23984 | 1.16830  |
| H | -4.43378 | 0.18870  | 2.63171  |
| H | -3.68019 | -2.04390 | 2.72201  |
| H | -1.32156 | -2.63984 | 2.62258  |
| H | -0.92313 | 1.97989  | 0.98705  |
| H | -2.83736 | 2.06448  | 2.45642  |
| H | -0.34977 | 0.16185  | -0.36855 |
| C | 0.65294  | -1.73224 | 0.92823  |
| P | -2.50420 | -0.51692 | -0.99653 |
| C | -2.89396 | -2.28072 | -1.06782 |
| H | -1.97980 | -2.82524 | -1.30766 |
| H | -3.27124 | -2.62313 | -0.10365 |
| H | -3.63561 | -2.44400 | -1.85296 |
| C | -1.76407 | -0.06669 | -2.58943 |
| H | -1.52434 | 0.99916  | -2.58986 |
| H | -0.83612 | -0.62711 | -2.72844 |
| H | -2.46092 | -0.28404 | -3.40069 |
| C | -4.04149 | 0.41895  | -0.86425 |
| C | -5.24112 | -0.22095 | -0.54163 |
| C | -4.02101 | 1.79937  | -1.09041 |
| C | -6.41615 | 0.51826  | -0.45267 |

|                                                                                   |          |          |          |   |          |          |          |
|-----------------------------------------------------------------------------------|----------|----------|----------|---|----------|----------|----------|
| C                                                                                 | 0.29074  | 1.63606  | -0.78792 | H | -5.26438 | -1.28866 | -0.34779 |
| C                                                                                 | 0.79679  | 2.52597  | 0.16664  | C | -5.19825 | 2.53297  | -0.99460 |
| C                                                                                 | 1.15345  | 1.00889  | -1.69294 | H | -3.09152 | 2.30935  | -1.32693 |
| C                                                                                 | 2.16089  | 2.79367  | 0.20444  | C | -6.39424 | 1.89273  | -0.67707 |
| H                                                                                 | 0.13830  | 2.99334  | 0.89439  | H | -7.34701 | 0.02010  | -0.20500 |
| C                                                                                 | 2.51653  | 1.28221  | -1.64636 | H | -5.18022 | 3.60339  | -1.16679 |
| H                                                                                 | 0.77305  | 0.27711  | -2.40099 | H | -7.31155 | 2.46719  | -0.60382 |
| C                                                                                 | 3.01957  | 2.17307  | -0.70030 | C | 1.48787  | 0.38985  | 1.88088  |
| H                                                                                 | 2.55442  | 3.47557  | 0.95075  | C | 1.55490  | -0.45478 | 0.82915  |
| H                                                                                 | 3.19132  | 0.77856  | -2.33069 | H | 0.83193  | 0.20289  | 2.72846  |
| H                                                                                 | 4.08605  | 2.36771  | -0.65754 | H | 2.08636  | 1.29418  | 1.90964  |
| TS2'                                                                              |          |          |          | C | 2.22516  | -0.10086 | -0.41742 |
| 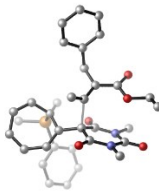 |          |          |          | C | 2.15694  | 1.32878  | -0.91394 |
| C                                                                                 | 1.72144  | -3.39811 | 2.03364  | H | 2.29721  | 1.30610  | -2.00199 |
| C                                                                                 | 2.91206  | -2.76354 | 2.55271  | H | 1.15843  | 1.75324  | -0.71873 |
| C                                                                                 | 3.11993  | -1.42186 | 2.60915  | C | 3.18130  | 2.29794  | -0.34529 |
| C                                                                                 | 0.91455  | -2.88770 | 1.08586  | C | 2.79815  | 3.44749  | 0.34744  |
| C                                                                                 | 2.23007  | -0.36399 | 2.18737  | C | 4.54971  | 2.04907  | -0.51503 |
| C                                                                                 | 1.18544  | -1.63358 | 0.30703  | C | 3.74658  | 4.33022  | 0.86437  |
| C                                                                                 | 1.29768  | -0.41407 | 1.20713  | H | 1.73783  | 3.64729  | 0.49288  |
| H                                                                                 | 3.63901  | -3.40749 | 3.04163  | C | 5.49818  | 2.92880  | -0.00522 |
| H                                                                                 | 4.00807  | -1.08824 | 3.14326  | H | 4.84914  | 1.15800  | -1.06039 |
| H                                                                                 | 2.31952  | 0.56024  | 2.74796  | C | 5.10217  | 4.07372  | 0.68825  |
| H                                                                                 | -0.01665 | -3.39751 | 0.85041  | H | 3.42502  | 5.21551  | 1.40565  |
| H                                                                                 | 1.44780  | -4.35417 | 2.47447  | H | 6.55509  | 2.72280  | -0.14835 |
| H                                                                                 | 0.34290  | -1.45546 | -0.35964 | H | 5.84544  | 4.75700  | 1.08749  |
| C                                                                                 | 0.33272  | 0.69030  | 0.91346  | C | 3.15808  | -0.92417 | -1.06631 |
| C                                                                                 | 0.14409  | 1.70387  | 1.97248  | O | 3.75825  | -0.71502 | -2.13485 |
| C                                                                                 | 0.46363  | 1.20652  | -0.46143 | O | 3.46000  | -2.09144 | -0.35608 |
| C                                                                                 | -0.35107 | 3.40288  | 0.25408  | C | 4.26542  | -3.02885 | -1.04924 |
| O                                                                                 | -0.72591 | 4.52211  | -0.04024 | C | 4.45361  | -4.22241 | -0.13260 |
| O                                                                                 | 0.24108  | 1.47295  | 3.16730  | H | 5.22424  | -2.57318 | -1.31647 |
| O                                                                                 | 0.83880  | 0.50415  | -1.39921 | H | 3.78161  | -3.32389 | -1.98988 |
| N                                                                                 | 0.04626  | 2.49109  | -0.72182 | H | 5.08609  | -4.97757 | -0.60690 |
| N                                                                                 | -0.24958 | 2.97969  | 1.56671  | H | 4.92502  | -3.91106 | 0.80316  |
| C                                                                                 | -0.10766 | 2.87263  | -2.12635 | H | 3.48965  | -4.68070 | 0.10889  |
| H                                                                                 | -0.95176 | 2.32607  | -2.55945 | C | 0.57145  | -2.56283 | -0.36792 |
| H                                                                                 | -0.29133 | 3.94230  | -2.16529 | H | -0.15777 | -3.36880 | -0.22835 |
| H                                                                                 | 0.80434  | 2.61916  | -2.66588 | H | 0.28290  | -1.94884 | -1.22760 |
|                                                                                   |          |          |          | H | 1.53877  | -3.00336 | -0.59982 |
|                                                                                   |          |          |          | C | 1.16634  | -2.64444 | 2.04617  |
|                                                                                   |          |          |          | H | 2.21057  | -2.88401 | 1.82973  |
|                                                                                   |          |          |          | H | 1.11896  | -2.14677 | 3.01793  |
|                                                                                   |          |          |          | H | 0.60103  | -3.58208 | 2.10087  |

|   |          |          |          |       |                                                                                    |          |          |
|---|----------|----------|----------|-------|------------------------------------------------------------------------------------|----------|----------|
| C | -0.59969 | 3.91961  | 2.62978  | TS3b' |                                                                                    |          |          |
| H | 0.21438  | 3.96238  | 3.35313  |       |                                                                                    |          |          |
| H | -0.76586 | 4.89352  | 2.17863  |       |                                                                                    |          |          |
| H | -1.50342 | 3.57741  | 3.13838  |       |                                                                                    |          |          |
| P | 2.54700  | -1.82037 | -0.95129 |       | 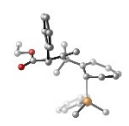 |          |          |
| C | 1.73327  | -2.10671 | -2.54376 | C     | 1.77826                                                                            | -3.76903 | 0.90144  |
| H | 1.12846  | -3.01322 | -2.44961 | C     | 2.76797                                                                            | -3.19688 | 1.79069  |
| H | 1.08557  | -1.26130 | -2.77699 | C     | 2.74921                                                                            | -1.96078 | 2.34631  |
| H | 2.48308  | -2.25410 | -3.32370 | C     | 0.91371                                                                            | -3.08903 | 0.11822  |
| C | 3.54149  | -3.31637 | -0.67578 | C     | 1.75064                                                                            | -0.91767 | 2.20249  |
| H | 4.13503  | -3.22715 | 0.23339  | C     | 0.79443                                                                            | -1.63935 | 0.02135  |
| H | 2.87824  | -4.17753 | -0.58202 | C     | 0.88634                                                                            | -0.73751 | 1.18127  |
| H | 4.19787  | -3.44318 | -1.53987 | H     | 3.57311                                                                            | -3.86249 | 2.09285  |
| C | 3.72107  | -0.45403 | -1.09394 | H     | 3.54286                                                                            | -1.73935 | 3.05817  |
| C | 3.62320  | 0.45467  | -2.15204 | H     | 1.74551                                                                            | -0.17634 | 2.99633  |
| C | 4.76235  | -0.34295 | -0.16737 | H     | 0.25267                                                                            | -3.65333 | -0.53443 |
| C | 4.56445  | 1.47099  | -2.27624 | H     | 1.77057                                                                            | -4.85357 | 0.82901  |
| H | 2.80594  | 0.38372  | -2.86040 | H     | 0.26849                                                                            | -1.25875 | -0.84640 |
| C | 5.69574  | 0.68008  | -0.29506 | C     | -0.07123                                                                           | 0.45888  | 1.08430  |
| H | 4.84222  | -1.04441 | 0.65781  | P     | 2.91482                                                                            | -1.17147 | -1.13789 |
| C | 5.59695  | 1.58572  | -1.34862 | C     | 2.34566                                                                            | -0.99206 | -2.87207 |
| H | 4.48695  | 2.17605  | -3.09680 | H     | 1.89211                                                                            | -1.94105 | -3.17202 |
| H | 6.49908  | 0.76856  | 0.42821  | H     | 1.57979                                                                            | -0.21546 | -2.94564 |
| H | 6.32675  | 2.38256  | -1.44706 | H     | 3.16821                                                                            | -0.76043 | -3.55376 |
| C | -1.58325 | -0.71721 | 2.04284  | C     | 4.17213                                                                            | -2.50711 | -1.26898 |
| C | -1.38985 | -0.16895 | 0.84895  | H     | 4.75727                                                                            | -2.54115 | -0.34840 |
| H | -0.85180 | -0.67374 | 2.84372  | H     | 3.65521                                                                            | -3.46317 | -1.38346 |
| H | -2.53019 | -1.21794 | 2.22876  | H     | 4.83400                                                                            | -2.33895 | -2.12242 |
| C | -2.02526 | -0.22998 | -0.39857 | C     | 3.87577                                                                            | 0.33231  | -0.78317 |
| C | -2.17485 | -1.54723 | -1.13907 | C     | 3.82582                                                                            | 1.46558  | -1.60198 |
| H | -2.18405 | -1.33905 | -2.21462 | C     | 4.60056                                                                            | 0.38679  | 0.41457  |
| H | -1.32812 | -2.21663 | -0.93901 | C     | 4.50084                                                                            | 2.62667  | -1.23429 |
| C | -3.44732 | -2.27635 | -0.75846 | H     | 3.25873                                                                            | 1.45198  | -2.52753 |
| C | -3.43409 | -3.32533 | 0.16264  | C     | 5.28108                                                                            | 1.54463  | 0.77391  |
| C | -4.67690 | -1.86914 | -1.28981 | H     | 4.62689                                                                            | -0.48107 | 1.06983  |
| C | -4.61487 | -3.95916 | 0.54644  | C     | 5.22977                                                                            | 2.66849  | -0.04888 |
| H | -2.48545 | -3.64759 | 0.58771  | H     | 4.45699                                                                            | 3.49969  | -1.87726 |
| C | -5.85652 | -2.50087 | -0.91089 | H     | 5.84578                                                                            | 1.57296  | 1.70013  |
| H | -4.68854 | -1.03785 | -1.98960 | H     | 5.75419                                                                            | 3.57479  | 0.23550  |
| C | -5.83099 | -3.54967 | 0.00835  | C     | -1.57705                                                                           | -1.46821 | 0.85001  |
| H | -4.58322 | -4.77424 | 1.26365  | C     | -1.37478                                                                           | -0.13761 | 0.48492  |
| H | -6.80222 | -2.17378 | -1.33318 | H     | -1.08767                                                                           | -1.87860 | 1.72344  |
| H | -6.75245 | -4.04266 | 0.30221  | H     | -2.43442                                                                           | -2.02252 | 0.48432  |
| C | -2.66829 | 0.89497  | -0.98774 |       |                                                                                    |          |          |

|                                                                                   |          |          |          |                                                                                      |          |          |          |
|-----------------------------------------------------------------------------------|----------|----------|----------|--------------------------------------------------------------------------------------|----------|----------|----------|
| O                                                                                 | -3.17207 | 0.94090  | -2.11376 | C                                                                                    | -2.14309 | 0.46729  | -0.52213 |
| O                                                                                 | -2.73308 | 1.99199  | -0.15695 | C                                                                                    | -3.05355 | -0.39364 | -1.36229 |
| C                                                                                 | -3.47470 | 3.10460  | -0.65797 | H                                                                                    | -3.25816 | 0.15193  | -2.28973 |
| C                                                                                 | -3.85816 | 3.96757  | 0.52641  | H                                                                                    | -2.53517 | -1.32094 | -1.64705 |
| H                                                                                 | -4.35449 | 2.73720  | -1.19138 | C                                                                                    | -4.39172 | -0.78297 | -0.74688 |
| H                                                                                 | -2.85927 | 3.66658  | -1.37133 | C                                                                                    | -5.18722 | -1.73894 | -1.38667 |
| H                                                                                 | -4.45694 | 4.81886  | 0.19142  | C                                                                                    | -4.86863 | -0.20403 | 0.42975  |
| H                                                                                 | -4.44546 | 3.38746  | 1.24255  | C                                                                                    | -6.42760 | -2.10294 | -0.87386 |
| H                                                                                 | -2.96630 | 4.35264  | 1.02503  | H                                                                                    | -4.82428 | -2.19972 | -2.30330 |
| M2'                                                                               |          |          |          | C                                                                                    | -6.11041 | -0.56638 | 0.94889  |
| 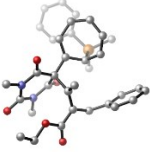 |          |          |          | H                                                                                    | -4.24999 | 0.53051  | 0.93864  |
| C                                                                                 | -2.64236 | 1.43343  | 2.38528  | C                                                                                    | -6.89566 | -1.51506 | 0.30020  |
| C                                                                                 | -3.33368 | 0.17581  | 2.58689  | H                                                                                    | -7.02931 | -2.84636 | -1.38854 |
| C                                                                                 | -2.83032 | -1.04998 | 2.28927  | H                                                                                    | -6.46425 | -0.10672 | 1.86721  |
| C                                                                                 | -1.75891 | 1.67382  | 1.40040  | H                                                                                    | -7.86221 | -1.79749 | 0.70595  |
| C                                                                                 | -1.50905 | -1.33272 | 1.76820  | C                                                                                    | -2.29269 | 1.88209  | -0.77542 |
| C                                                                                 | -1.44687 | 0.67835  | 0.31316  | O                                                                                    | -2.73086 | 2.39144  | -1.80037 |
| C                                                                                 | -0.79890 | -0.54668 | 0.93345  | O                                                                                    | -1.99797 | 2.67764  | 0.30249  |
| H                                                                                 | -4.28073 | 0.21311  | 3.12101  | C                                                                                    | -2.06349 | 4.08197  | 0.06393  |
| H                                                                                 | -3.41552 | -1.91707 | 2.58737  | C                                                                                    | -1.60465 | 4.77244  | 1.33161  |
| H                                                                                 | -1.05271 | -2.24369 | 2.13945  | H                                                                                    | -3.08864 | 4.35756  | -0.20203 |
| H                                                                                 | -1.20566 | 2.61014  | 1.36174  | H                                                                                    | -1.42736 | 4.33949  | -0.79061 |
| H                                                                                 | -2.85399 | 2.23115  | 3.09328  | H                                                                                    | -1.64972 | 5.85758  | 1.21008  |
| H                                                                                 | -0.74707 | 1.13426  | -0.38852 | H                                                                                    | -2.24224 | 4.49089  | 2.17352  |
| C                                                                                 | 0.66659  | -0.75460 | 0.59012  | H                                                                                    | -0.57493 | 4.49325  | 1.57326  |
| C                                                                                 | 1.39085  | -1.71109 | 1.52126  | C                                                                                    | 0.67129  | 1.44997  | 0.15788  |
| C                                                                                 | 0.81616  | -1.14051 | -0.86701 | H                                                                                    | 0.78602  | 1.04493  | -0.85404 |
| C                                                                                 | 2.86930  | -2.35317 | -0.33957 | H                                                                                    | 0.14299  | 2.39765  | 0.08167  |
| O                                                                                 | 3.88803  | -2.88238 | -0.72752 | H                                                                                    | 1.66988  | 1.64020  | 0.56520  |
| O                                                                                 | 1.12107  | -1.83297 | 2.70049  | C                                                                                    | -0.33569 | 1.11755  | 2.44276  |
| O                                                                                 | -0.04598 | -0.85895 | -1.68843 | H                                                                                    | -0.69091 | 0.37992  | 3.16795  |
| N                                                                                 | 1.97960  | -1.76624 | -1.23684 | H                                                                                    | 0.56816  | 1.59297  | 2.83906  |
| N                                                                                 | 2.46676  | -2.40020 | 0.99241  | H                                                                                    | -1.09786 | 1.88774  | 2.31865  |
| C                                                                                 | 2.42034  | -1.68837 | -2.63378 | R2c                                                                                  |          |          |          |
| H                                                                                 | 3.15838  | -0.88479 | -2.72419 |  |          |          |          |
| H                                                                                 | 2.85982  | -2.64043 | -2.92371 | C                                                                                    | -1.88880 | 0.67377  | 0.00028  |
| H                                                                                 | 1.54812  | -1.46500 | -3.24180 | C                                                                                    | -1.88881 | -0.67373 | 0.00028  |
| C                                                                                 | 3.28312  | -3.15689 | 1.94035  | C                                                                                    | -0.74255 | -1.56654 | -0.00014 |
| H                                                                                 | 2.64223  | -3.83923 | 2.49880  |                                                                                      |          |          |          |
| H                                                                                 | 4.03219  | -3.70592 | 1.37697  |                                                                                      |          |          |          |

|   |          |          |          |                                                                                    |          |          |          |
|---|----------|----------|----------|------------------------------------------------------------------------------------|----------|----------|----------|
| H | 3.76255  | -2.47048 | 2.64128  | C                                                                                  | -0.74251 | 1.56655  | -0.00015 |
| P | -2.90720 | 0.33094  | -0.80310 | C                                                                                  | 0.57476  | -1.28571 | -0.00036 |
| C | -2.45614 | 0.60974  | -2.53705 | C                                                                                  | 0.57478  | 1.28568  | -0.00038 |
| H | -2.03241 | 1.60924  | -2.64370 | C                                                                                  | 1.28465  | -0.00002 | -0.00006 |
| H | -1.71945 | -0.12424 | -2.85639 | H                                                                                  | -2.85670 | -1.16829 | 0.00052  |
| H | -3.36712 | 0.53059  | -3.13460 | H                                                                                  | -0.99724 | -2.62367 | -0.00035 |
| C | -4.20473 | 1.55369  | -0.47786 | H                                                                                  | 1.24341  | -2.14490 | -0.00075 |
| H | -4.62751 | 1.42821  | 0.51831  | H                                                                                  | -0.99718 | 2.62369  | -0.00031 |
| H | -3.74485 | 2.54419  | -0.53799 | H                                                                                  | -2.85669 | 1.16833  | 0.00053  |
| H | -4.98034 | 1.45850  | -1.24089 | H                                                                                  | 1.24346  | 2.14487  | -0.00071 |
| C | -3.61244 | -1.33037 | -0.73716 | C                                                                                  | 2.63295  | -0.00001 | 0.00047  |
| C | -2.85477 | -2.40783 | -1.20796 | H                                                                                  | 3.19697  | 0.92630  | 0.00076  |
| C | -4.90647 | -1.53442 | -0.25058 | H                                                                                  | 3.19711  | -0.92619 | 0.00071  |
| C | -3.39694 | -3.68899 | -1.17983 | TS2c                                                                               |          |          |          |
| H | -1.84805 | -2.24500 | -1.58211 | 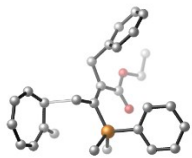 |          |          |          |
| C | -5.44216 | -2.81735 | -0.23454 | C                                                                                  | -1.56882 | -0.73593 | -0.75805 |
| H | -5.49346 | -0.70241 | 0.12586  | C                                                                                  | -0.62263 | -0.09815 | 0.07751  |
| C | -4.68636 | -3.89362 | -0.69485 | H                                                                                  | -1.23494 | -1.62215 | -1.28416 |
| H | -2.80988 | -4.52798 | -1.53764 | H                                                                                  | -2.28412 | -0.15256 | -1.32340 |
| H | -6.44722 | -2.97614 | 0.14103  | C                                                                                  | 0.45142  | -0.74903 | 0.69448  |
| H | -5.10467 | -4.89467 | -0.67622 | C                                                                                  | 0.77901  | -2.19882 | 0.40791  |
| C | 1.49512  | 1.12693  | 1.98050  | H                                                                                  | 1.04386  | -2.70614 | 1.33987  |
| C | 1.45975  | 0.65286  | 0.73348  | H                                                                                  | -0.10066 | -2.71303 | 0.00989  |
| H | 1.04307  | 0.59769  | 2.81602  | C                                                                                  | 1.93565  | -2.33612 | -0.56660 |
| H | 2.00127  | 2.06192  | 2.18968  | C                                                                                  | 1.82802  | -1.83747 | -1.86976 |
| C | 2.04038  | 1.27892  | -0.46934 | C                                                                                  | 3.13844  | -2.92582 | -0.17659 |
| C | 1.23468  | 2.17356  | -1.38135 | C                                                                                  | 2.89372  | -1.93036 | -2.75991 |
| H | 1.95519  | 2.56307  | -2.11098 | H                                                                                  | 0.89975  | -1.36426 | -2.18366 |
| H | 0.48150  | 1.63039  | -1.98485 | C                                                                                  | 4.20844  | -3.02196 | -1.06470 |
| C | 0.52491  | 3.34206  | -0.71676 | H                                                                                  | 3.23697  | -3.29964 | 0.83913  |
| C | -0.71419 | 3.79989  | -1.17836 | C                                                                                  | 4.08967  | -2.52496 | -2.35946 |
| C | 1.08945  | 3.99742  | 0.38092  | H                                                                                  | 2.79030  | -1.54123 | -3.76832 |
| C | -1.38854 | 4.84518  | -0.54792 | H                                                                                  | 5.13708  | -3.48315 | -0.74218 |
| H | -1.14652 | 3.34450  | -2.06706 | H                                                                                  | 4.92192  | -2.59844 | -3.05211 |
| C | 0.42542  | 5.04282  | 1.01750  | C                                                                                  | 1.37696  | -0.01143 | 1.51332  |
| H | 2.06450  | 3.66531  | 0.72360  | O                                                                                  | 1.32327  | 1.19796  | 1.75253  |
| C | -0.82539 | 5.46275  | 0.56613  | O                                                                                  | 2.37033  | -0.77554 | 2.01688  |
| H | -2.34790 | 5.18182  | -0.93149 | C                                                                                  | 3.37718  | -0.08656 | 2.76206  |
| H | 0.88536  | 5.53201  | 1.87107  | C                                                                                  | 4.48398  | -1.08275 | 3.03336  |
| H | -1.34688 | 6.27166  | 1.06792  |                                                                                    |          |          |          |
| C | 3.34155  | 0.97282  | -0.87787 |                                                                                    |          |          |          |
| O | 3.94111  | 1.35909  | -1.89757 |                                                                                    |          |          |          |
| O | 3.99996  | 0.09013  | -0.01317 |                                                                                    |          |          |          |
| C | 5.36272  | -0.15201 | -0.33676 |                                                                                    |          |          |          |

|                                                                                   |          |          |          |     |          |          |          |
|-----------------------------------------------------------------------------------|----------|----------|----------|-----|----------|----------|----------|
| C                                                                                 | 5.99322  | -0.87040 | 0.83921  | H   | 2.93878  | 0.30156  | 3.68732  |
| H                                                                                 | 5.86284  | 0.79930  | -0.54149 | H   | 3.73045  | 0.76909  | 2.17986  |
| H                                                                                 | 5.43167  | -0.75980 | -1.24701 | H   | 5.28365  | -0.61036 | 3.60851  |
| H                                                                                 | 7.06259  | -1.01808 | 0.66414  | H   | 4.10374  | -1.93506 | 3.60173  |
| H                                                                                 | 5.86709  | -0.28655 | 1.75541  | H   | 4.89901  | -1.45078 | 2.09177  |
| H                                                                                 | 5.53157  | -1.85021 | 0.97931  | P   | -0.87361 | 1.68845  | 0.30681  |
| TS3'                                                                              |          |          |          | C   | -1.09644 | 2.39306  | 1.97522  |
| 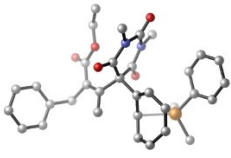 |          |          |          | H   | -2.12772 | 2.73242  | 2.07998  |
|                                                                                   |          |          |          | H   | -0.86962 | 1.63518  | 2.72029  |
|                                                                                   |          |          |          | H   | -0.39304 | 3.21863  | 2.09551  |
|                                                                                   |          |          |          | C   | -2.37918 | 2.18273  | -0.58765 |
|                                                                                   |          |          |          | H   | -3.25076 | 1.63736  | -0.21528 |
|                                                                                   |          |          |          | H   | -2.51885 | 3.25374  | -0.41862 |
|                                                                                   |          |          |          | H   | -2.26147 | 2.01094  | -1.65801 |
|                                                                                   |          |          |          | C   | 0.42998  | 2.59788  | -0.57598 |
|                                                                                   |          |          |          | C   | 0.38515  | 3.99434  | -0.59360 |
|                                                                                   |          |          |          | C   | 1.42527  | 1.92356  | -1.28528 |
|                                                                                   |          |          |          | C   | 1.33552  | 4.71276  | -1.31325 |
|                                                                                   |          |          |          | H   | -0.38464 | 4.53196  | -0.04488 |
|                                                                                   |          |          |          | C   | 2.37019  | 2.64681  | -2.00656 |
|                                                                                   |          |          |          | H   | 1.47213  | 0.83888  | -1.26233 |
|                                                                                   |          |          |          | C   | 2.32738  | 4.03885  | -2.02155 |
|                                                                                   |          |          |          | H   | 1.29993  | 5.79700  | -1.31976 |
|                                                                                   |          |          |          | H   | 3.14430  | 2.11687  | -2.55188 |
|                                                                                   |          |          |          | H   | 3.06755  | 4.59932  | -2.58315 |
|                                                                                   |          |          |          | C   | -4.63016 | -2.59136 | -1.22643 |
|                                                                                   |          |          |          | C   | -5.54345 | -1.56296 | -1.31927 |
|                                                                                   |          |          |          | C   | -5.62447 | -0.42485 | -0.47290 |
|                                                                                   |          |          |          | C   | -3.50802 | -2.70471 | -0.39084 |
|                                                                                   |          |          |          | C   | -4.84962 | -0.05412 | 0.59051  |
|                                                                                   |          |          |          | C   | -2.91097 | -1.73648 | 0.43507  |
|                                                                                   |          |          |          | C   | -3.62776 | -0.62732 | 1.11889  |
|                                                                                   |          |          |          | H   | -6.32231 | -1.65655 | -2.07016 |
|                                                                                   |          |          |          | H   | -6.47282 | 0.22923  | -0.66887 |
|                                                                                   |          |          |          | H   | -5.18758 | 0.82618  | 1.13713  |
|                                                                                   |          |          |          | H   | -2.92444 | -3.61478 | -0.51660 |
|                                                                                   |          |          |          | H   | -4.79378 | -3.43437 | -1.89587 |
|                                                                                   |          |          |          | H   | -2.10651 | -2.12627 | 1.06041  |
|                                                                                   |          |          |          | C   | -3.05801 | -0.09773 | 2.22897  |
|                                                                                   |          |          |          | H   | -2.14246 | -0.51072 | 2.64000  |
|                                                                                   |          |          |          | H   | -3.53705 | 0.70826  | 2.77679  |
|                                                                                   |          |          |          | M2c |          |          |          |
| C                                                                                 | 1.69230  | -3.74908 | 1.40044  |     |          |          |          |
| C                                                                                 | 2.68234  | -2.90815 | 2.05688  |     |          |          |          |
| C                                                                                 | 2.66540  | -1.56399 | 2.18939  |     |          |          |          |
| C                                                                                 | 0.84906  | -3.36959 | 0.42134  |     |          |          |          |
| C                                                                                 | 1.62496  | -0.64232 | 1.75313  |     |          |          |          |
| C                                                                                 | 0.73132  | -2.01709 | -0.13659 |     |          |          |          |
| C                                                                                 | 0.76487  | -0.81744 | 0.73284  |     |          |          |          |
| H                                                                                 | 3.50720  | -3.43746 | 2.52977  |     |          |          |          |
| H                                                                                 | 3.48176  | -1.10606 | 2.74278  |     |          |          |          |
| H                                                                                 | 1.56797  | 0.28099  | 2.32455  |     |          |          |          |
| H                                                                                 | 0.19527  | -4.11393 | -0.02422 |     |          |          |          |
| H                                                                                 | 1.68383  | -4.79543 | 1.69327  |     |          |          |          |
| H                                                                                 | 0.25363  | -1.90459 | -1.10071 |     |          |          |          |
| C                                                                                 | -0.33868 | 0.21391  | 0.38285  |     |          |          |          |
| C                                                                                 | -0.60895 | 1.11732  | 1.57852  |     |          |          |          |
| C                                                                                 | 0.24110  | 0.93996  | -0.83134 |     |          |          |          |
| C                                                                                 | 0.87531  | 2.82596  | 0.61274  |     |          |          |          |
| O                                                                                 | 1.50215  | 3.85965  | 0.74219  |     |          |          |          |
| O                                                                                 | -1.35707 | 0.79720  | 2.47031  |     |          |          |          |
| O                                                                                 | 0.31859  | 0.40034  | -1.91834 |     |          |          |          |
| N                                                                                 | 0.81651  | 2.18262  | -0.61652 |     |          |          |          |
| N                                                                                 | 0.15250  | 2.28172  | 1.66114  |     |          |          |          |
| C                                                                                 | 1.34133  | 2.94168  | -1.75291 |     |          |          |          |
| H                                                                                 | 1.08030  | 2.40134  | -2.65923 |     |          |          |          |
| H                                                                                 | 0.89053  | 3.93540  | -1.75421 |     |          |          |          |
| H                                                                                 | 2.42466  | 3.05572  | -1.67995 |     |          |          |          |
| C                                                                                 | 0.10050  | 3.08258  | 2.88512  |     |          |          |          |
| H                                                                                 | -0.36457 | 2.47508  | 3.65663  |     |          |          |          |
| H                                                                                 | 1.11320  | 3.36714  | 3.16699  |     |          |          |          |
| H                                                                                 | -0.48967 | 3.98688  | 2.71819  |     |          |          |          |



|                                                                                   |          |          |          |                                                                                      |          |          |          |
|-----------------------------------------------------------------------------------|----------|----------|----------|--------------------------------------------------------------------------------------|----------|----------|----------|
| H                                                                                 | -3.30215 | 3.55824  | -1.39220 | C                                                                                    | -1.89671 | 0.01627  | 0.09699  |
| H                                                                                 | -1.63936 | 3.66648  | -1.96969 | C                                                                                    | -2.55430 | -1.27074 | -0.34834 |
| H                                                                                 | -2.29024 | 5.40093  | -0.18451 | H                                                                                    | -2.33631 | -1.42188 | -1.41076 |
| H                                                                                 | -2.45594 | 4.06215  | 0.96520  | H                                                                                    | -2.13479 | -2.12811 | 0.20023  |
| H                                                                                 | -0.86905 | 4.46568  | 0.26905  | C                                                                                    | -4.06591 | -1.30390 | -0.19502 |
| TS3''                                                                             |          |          |          | C                                                                                    | -4.71689 | -2.36226 | 0.44013  |
| 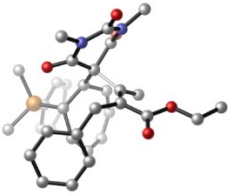 |          |          |          | C                                                                                    | -4.84266 | -0.27009 | -0.72834 |
| C                                                                                 | -1.84841 | 1.41639  | 2.00492  | C                                                                                    | -6.10660 | -2.39038 | 0.55158  |
| C                                                                                 | -2.23098 | 0.17861  | 2.65913  | H                                                                                    | -4.12448 | -3.17387 | 0.85877  |
| C                                                                                 | -1.81685 | -1.04824 | 2.28994  | C                                                                                    | -6.22914 | -0.29570 | -0.62553 |
| C                                                                                 | -1.44233 | 1.55869  | 0.73333  | H                                                                                    | -4.33947 | 0.54871  | -1.23587 |
| C                                                                                 | -0.90903 | -1.42170 | 1.20031  | C                                                                                    | -6.86814 | -1.35566 | 0.01874  |
| C                                                                                 | -1.42174 | 0.50591  | -0.34857 | H                                                                                    | -6.59232 | -3.21974 | 1.05748  |
| C                                                                                 | -0.84373 | -0.87988 | -0.11030 | H                                                                                    | -6.81664 | 0.51363  | -1.04956 |
| H                                                                                 | -2.84026 | 0.26613  | 3.55597  | H                                                                                    | -7.95036 | -1.37234 | 0.10355  |
| H                                                                                 | -2.13228 | -1.87788 | 2.92123  | C                                                                                    | -1.67106 | 0.95187  | -0.92863 |
| H                                                                                 | -0.67177 | -2.47221 | 1.25968  | O                                                                                    | -1.77705 | 0.74223  | -2.15473 |
| H                                                                                 | -1.12960 | 2.54767  | 0.41148  | O                                                                                    | -1.25949 | 2.22378  | -0.52532 |
| H                                                                                 | -1.86124 | 2.31371  | 2.62216  | C                                                                                    | -1.29182 | 3.23031  | -1.52836 |
| H                                                                                 | -0.91527 | 0.96074  | -1.20294 | C                                                                                    | -0.56311 | 4.43733  | -0.97163 |
| C                                                                                 | 0.55285  | -1.08766 | -0.63190 | H                                                                                    | -2.33361 | 3.47087  | -1.77408 |
| C                                                                                 | 1.03939  | -2.55381 | -0.61257 | H                                                                                    | -0.82320 | 2.86462  | -2.44724 |
| C                                                                                 | 0.83180  | -0.62215 | -2.05530 | H                                                                                    | -0.59010 | 5.26557  | -1.68432 |
| C                                                                                 | 2.91971  | -1.93395 | -2.03957 | H                                                                                    | -1.02371 | 4.76835  | -0.03678 |
| O                                                                                 | 4.03645  | -2.12679 | -2.47186 | H                                                                                    | 0.48344  | 4.18940  | -0.76613 |
| O                                                                                 | 0.43525  | -3.51258 | -0.18878 | H                                                                                    | -0.74376 | 1.23589  | 3.12260  |
| O                                                                                 | 0.07525  | 0.04199  | -2.74678 | H                                                                                    | -1.15511 | 2.28694  | 1.77012  |
| N                                                                                 | 2.06722  | -0.96985 | -2.58637 | TS1c'                                                                                |          |          |          |
| N                                                                                 | 2.35461  | -2.72466 | -1.05567 |  |          |          |          |
| C                                                                                 | 2.44372  | -0.36391 | -3.86171 | C                                                                                    | -3.15810 | -0.47927 | -0.89000 |
| H                                                                                 | 3.47512  | -0.63358 | -4.06935 | C                                                                                    | -2.56714 | -1.73144 | -0.95839 |
| H                                                                                 | 1.78525  | -0.72331 | -4.65476 | C                                                                                    | -1.67132 | -2.29017 | -0.00993 |
| H                                                                                 | 2.34338  | 0.72130  | -3.79299 | C                                                                                    | -2.88034 | 0.57534  | -0.02104 |
| C                                                                                 | 3.04854  | -3.95439 | -0.68288 | C                                                                                    | -1.09942 | -1.76384 | 1.11833  |
| H                                                                                 | 2.73161  | -4.78909 | -1.31291 | C                                                                                    | -1.75654 | 0.70324  | 0.85104  |
| H                                                                                 | 4.11590  | -3.78678 | -0.80183 | C                                                                                    | -1.13542 | -0.41536 | 1.63623  |
| H                                                                                 | 2.80934  | -4.18035 | 0.35533  | H                                                                                    | -2.90461 | -2.39668 | -1.74748 |
| P                                                                                 | -3.10091 | 0.29431  | -1.06203 | H                                                                                    | -1.41197 | -3.33246 | -0.19748 |
|                                                                                   |          |          |          | H                                                                                    | -0.48162 | -2.44099 | 1.70477  |





|                                                                                    |          |          |          |                                                                                      |          |          |          |
|------------------------------------------------------------------------------------|----------|----------|----------|--------------------------------------------------------------------------------------|----------|----------|----------|
| H                                                                                  | 5.67329  | 0.47976  | 2.67829  | H                                                                                    | -2.54739 | 1.69521  | 1.83008  |
| H                                                                                  | 5.65311  | -0.78695 | 4.85446  | H                                                                                    | -4.29331 | 1.42429  | 0.29690  |
| H                                                                                  | 3.93934  | -1.17701 | 4.60696  | H                                                                                    | -0.60670 | 0.44127  | 2.04362  |
| H                                                                                  | 5.16538  | -1.84345 | 3.51489  | C                                                                                    | -0.28045 | -1.99865 | 1.77773  |
| <b>MeOH</b>                                                                        |          |          |          | P                                                                                    | -0.01102 | 0.99689  | -0.14934 |
| 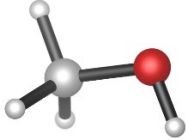  |          |          |          | C                                                                                    | 0.08675  | 2.76291  | 0.24268  |
| O                                                                                  | 0.74576  | 0.12251  | 0.00006  | H                                                                                    | -0.92983 | 3.15809  | 0.20221  |
| H                                                                                  | 1.13300  | -0.75887 | -0.00037 | H                                                                                    | 0.48322  | 2.90405  | 1.25063  |
| C                                                                                  | -0.65981 | -0.01967 | 0.00006  | H                                                                                    | 0.71800  | 3.28110  | -0.48179 |
| H                                                                                  | -1.08394 | 0.98625  | -0.00147 | C                                                                                    | -0.68119 | 0.84564  | -1.81915 |
| H                                                                                  | -1.02794 | -0.54564 | -0.89016 | H                                                                                    | -0.67594 | -0.20857 | -2.10226 |
| H                                                                                  | -1.02830 | -0.54378 | 0.89115  | H                                                                                    | -1.71774 | 1.18859  | -1.80503 |
| <b>R1-sol</b>                                                                      |          |          |          | H                                                                                    | -0.06947 | 1.43653  | -2.50407 |
|  |          |          |          | C                                                                                    | 1.66659  | 0.32252  | -0.17639 |
| C                                                                                  | -4.96664 | -0.97223 | -0.04575 | C                                                                                    | 2.76164  | 1.05946  | 0.28292  |
| C                                                                                  | -5.08088 | 0.37689  | 0.09160  | C                                                                                    | 1.84900  | -0.98828 | -0.64072 |
| C                                                                                  | -4.06123 | 1.25561  | 0.56227  | C                                                                                    | 4.03358  | 0.49280  | 0.27289  |
| C                                                                                  | -3.80702 | -1.74458 | 0.25768  | H                                                                                    | 2.63257  | 2.07416  | 0.64626  |
| C                                                                                  | -2.71102 | 1.08295  | 0.63635  | C                                                                                    | 3.12183  | -1.54468 | -0.65043 |
| C                                                                                  | -2.50409 | -1.36551 | 0.38564  | H                                                                                    | 0.99511  | -1.57133 | -0.97560 |
| C                                                                                  | -1.90949 | -0.05212 | 0.21847  | C                                                                                    | 4.21288  | -0.80560 | -0.19444 |
| H                                                                                  | -6.05515 | 0.82348  | -0.08567 | H                                                                                    | 4.88247  | 1.06791  | 0.62712  |
| H                                                                                  | -4.41143 | 2.23649  | 0.87461  | H                                                                                    | 3.26240  | -2.55807 | -1.01074 |
| H                                                                                  | -2.15128 | 1.93358  | 0.99959  | H                                                                                    | 5.20532  | -1.24452 | -0.20433 |
| H                                                                                  | -3.98278 | -2.81224 | 0.36490  | H                                                                                    | -0.23096 | -3.08262 | 1.74832  |
| H                                                                                  | -5.85582 | -1.53008 | -0.32528 | H                                                                                    | 0.34170  | -1.49362 | 2.50935  |
| H                                                                                  | -1.80441 | -2.16497 | 0.58625  | <b>TS2c'</b>                                                                         |          |          |          |
| C                                                                                  | -0.56388 | 0.09637  | -0.13817 |  |          |          |          |
| C                                                                                  | 0.05425  | 1.42615  | -0.22488 | C                                                                                    | -1.97501 | -2.54480 | -0.25172 |
| C                                                                                  | 0.24099  | -1.06922 | -0.53378 | C                                                                                    | -2.77541 | -2.23093 | -1.38939 |
| C                                                                                  | 2.24154  | 0.37307  | -0.65640 | C                                                                                    | -2.67539 | -1.08553 | -2.15112 |
| O                                                                                  | 3.44945  | 0.47626  | -0.82997 | C                                                                                    | -1.19561 | -1.72189 | 0.49882  |
| O                                                                                  | -0.53200 | 2.49525  | -0.12905 | C                                                                                    | -1.87527 | 0.06242  | -1.99931 |
| O                                                                                  | -0.20148 | -2.19333 | -0.71821 | C                                                                                    | -1.17194 | -0.22250 | 0.44522  |
| N                                                                                  | 1.61786  | -0.85506 | -0.70461 | C                                                                                    | -1.06846 | 0.46057  | -0.91547 |
|                                                                                    |          |          |          | H                                                                                    | -3.44504 | -3.00832 | -1.74388 |
|                                                                                    |          |          |          | H                                                                                    | -3.29616 | -1.07515 | -3.04744 |
|                                                                                    |          |          |          | H                                                                                    | -1.87565 | 0.75324  | -2.83979 |
|                                                                                    |          |          |          | H                                                                                    | -0.54422 | -2.16472 | 1.24719  |

|                                                                                    |          |          |          |   |          |          |          |
|------------------------------------------------------------------------------------|----------|----------|----------|---|----------|----------|----------|
| N                                                                                  | 1.43904  | 1.47065  | -0.42613 | H | -1.93960 | -3.59993 | 0.02252  |
| C                                                                                  | 2.48347  | -1.99668 | -1.01768 | H | -0.32274 | 0.12791  | 1.04993  |
| H                                                                                  | 3.28337  | -2.06099 | -0.27795 | C | -0.12274 | 1.47008  | -0.99788 |
| H                                                                                  | 1.86762  | -2.88984 | -0.99815 | P | -2.61243 | 0.46363  | 1.36783  |
| H                                                                                  | 2.92434  | -1.86352 | -2.00698 | C | -2.46728 | 2.26702  | 1.48374  |
| C                                                                                  | 2.05061  | 2.79964  | -0.44510 | H | -1.58301 | 2.50797  | 2.07853  |
| H                                                                                  | 1.79739  | 3.32448  | 0.47610  | H | -2.33146 | 2.67956  | 0.48211  |
| H                                                                                  | 3.12518  | 2.67308  | -0.53357 | H | -3.35852 | 2.68878  | 1.95261  |
| H                                                                                  | 1.66203  | 3.37236  | -1.28862 | C | -2.57847 | -0.21143 | 3.04688  |
| C                                                                                  | 3.88010  | -0.55055 | 2.07552  | H | -2.52400 | -1.30011 | 2.99053  |
| H                                                                                  | 4.11343  | -1.01482 | 3.03630  | H | -1.68378 | 0.16027  | 3.55214  |
| H                                                                                  | 2.86694  | -0.87019 | 1.78570  | H | -3.46898 | 0.09443  | 3.59881  |
| H                                                                                  | 3.86835  | 0.53877  | 2.21412  | C | -4.19732 | 0.07535  | 0.61640  |
| O                                                                                  | 4.85877  | -0.96332 | 1.14867  | C | -4.69613 | 0.90941  | -0.38904 |
| H                                                                                  | 4.67581  | -0.48235 | 0.32777  | C | -4.89591 | -1.07707 | 0.98905  |
| R1-sol-1                                                                           |          |          |          | C | -5.88817 | 0.58369  | -1.02450 |
| 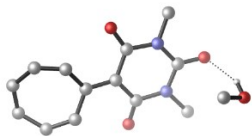 |          |          |          | H | -4.14663 | 1.79343  | -0.69547 |
| C                                                                                  | -4.98912 | -0.94570 | -0.05049 | C | -6.08995 | -1.39355 | 0.35157  |
| C                                                                                  | -5.08706 | 0.40113  | 0.11860  | H | -4.50474 | -1.73470 | 1.75904  |
| C                                                                                  | -4.05472 | 1.25651  | 0.60412  | C | -6.58123 | -0.56724 | -0.65662 |
| C                                                                                  | -3.83699 | -1.73868 | 0.22748  | H | -6.27302 | 1.22609  | -1.80898 |
| C                                                                                  | -2.70686 | 1.06485  | 0.66576  | H | -6.63229 | -2.28862 | 0.63613  |
| C                                                                                  | -2.52848 | -1.38011 | 0.35877  | H | -7.51054 | -0.82006 | -1.15675 |
| C                                                                                  | -1.91962 | -0.07006 | 0.21955  | C | 1.50985  | -0.47070 | -2.25573 |
| H                                                                                  | -6.05669 | 0.86291  | -0.04415 | C | 1.72198  | 0.17665  | -1.12953 |
| H                                                                                  | -4.39148 | 2.23353  | 0.94221  | H | 0.53164  | -0.52684 | -2.72669 |
| H                                                                                  | -2.13517 | 1.89819  | 1.04946  | H | 2.34996  | -0.96835 | -2.73545 |
| H                                                                                  | -4.02525 | -2.80678 | 0.30528  | C | 2.45682  | 0.33965  | -0.00109 |
| H                                                                                  | -5.88615 | -1.48613 | -0.33880 | C | 2.73021  | -0.83927 | 0.91775  |
| H                                                                                  | -1.83741 | -2.19359 | 0.53113  | H | 2.77174  | -0.48254 | 1.95235  |
| C                                                                                  | -0.57421 | 0.07742  | -0.13778 | H | 1.90734  | -1.55525 | 0.83026  |
| C                                                                                  | 0.03610  | 1.41035  | -0.23771 | C | 4.03306  | -1.52568 | 0.56735  |
| C                                                                                  | 0.24027  | -1.08680 | -0.51787 | C | 4.04799  | -2.60932 | -0.31427 |
| C                                                                                  | 2.23144  | 0.36766  | -0.65308 | C | 5.24727  | -1.05221 | 1.07367  |
| O                                                                                  | 3.43768  | 0.47881  | -0.83229 | C | 5.24830  | -3.21450 | -0.67825 |
| O                                                                                  | -0.55960 | 2.47535  | -0.15497 | H | 3.10669  | -2.97788 | -0.71552 |
| O                                                                                  | -0.19130 | -2.21598 | -0.69575 | C | 6.44788  | -1.65625 | 0.71144  |
| N                                                                                  | 1.61865  | -0.86652 | -0.67248 | H | 5.23592  | -0.19383 | 1.73953  |
|                                                                                    |          |          |          | C | 6.45299  | -2.74006 | -0.16469 |
|                                                                                    |          |          |          | H | 5.24286  | -4.05968 | -1.36008 |
|                                                                                    |          |          |          | H | 7.38380  | -1.27936 | 1.11330  |
|                                                                                    |          |          |          | H | 7.38958  | -3.21210 | -0.44493 |
|                                                                                    |          |          |          | C | 3.01615  | 1.61850  | 0.38516  |
|                                                                                    |          |          |          | O | 3.68123  | 1.82772  | 1.39116  |

|                                                                                    |          |          |          |
|------------------------------------------------------------------------------------|----------|----------|----------|
| N                                                                                  | 1.41951  | 1.46277  | -0.44426 |
| C                                                                                  | 2.49083  | -2.00870 | -0.96472 |
| H                                                                                  | 3.32166  | -2.02020 | -0.25810 |
| H                                                                                  | 1.89299  | -2.90967 | -0.87215 |
| H                                                                                  | 2.88648  | -1.92430 | -1.97863 |
| C                                                                                  | 2.01930  | 2.79644  | -0.49169 |
| H                                                                                  | 1.75400  | 3.34072  | 0.41456  |
| H                                                                                  | 3.09551  | 2.67769  | -0.57017 |
| H                                                                                  | 1.63137  | 3.34473  | -1.35152 |
| C                                                                                  | 3.97092  | -0.49734 | 2.06428  |
| H                                                                                  | 4.23187  | -0.95333 | 3.02186  |
| H                                                                                  | 2.95015  | -0.81941 | 1.80571  |
| H                                                                                  | 3.96309  | 0.59319  | 2.19304  |
| O                                                                                  | 4.92281  | -0.91860 | 1.11343  |
| H                                                                                  | 4.71044  | -0.44960 | 0.29271  |
| <b>R1-2sol</b>                                                                     |          |          |          |
| 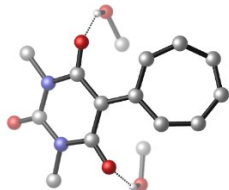 |          |          |          |
| C                                                                                  | -4.22863 | 0.59654  | 0.23718  |
| C                                                                                  | -4.19766 | -0.76559 | 0.26292  |
| C                                                                                  | -3.31074 | -1.58984 | -0.48877 |
| C                                                                                  | -3.37906 | 1.43108  | -0.54569 |
| C                                                                                  | -2.10352 | -1.29256 | -1.05096 |
| C                                                                                  | -2.15862 | 1.16656  | -1.09550 |
| C                                                                                  | -1.36537 | -0.04426 | -0.98222 |
| H                                                                                  | -4.97420 | -1.27905 | 0.82269  |
| H                                                                                  | -3.62137 | -2.62657 | -0.59303 |
| H                                                                                  | -1.59521 | -2.10501 | -1.55016 |
| H                                                                                  | -3.73589 | 2.44799  | -0.68978 |
| H                                                                                  | -5.02826 | 1.09493  | 0.77750  |
| H                                                                                  | -1.68858 | 1.98048  | -1.62804 |
| C                                                                                  | 0.03318  | -0.00977 | -0.93811 |
| C                                                                                  | 0.81254  | -1.24376 | -0.81040 |
| C                                                                                  | 0.74527  | 1.26481  | -0.81026 |
| C                                                                                  | 2.84445  | 0.06658  | -0.30746 |
| O                                                                                  | 4.02024  | 0.09789  | -0.00878 |
| O                                                                                  | 0.35376  | -2.38053 | -0.92533 |
| O                                                                                  | 0.22849  | 2.37469  | -0.93802 |
| N                                                                                  | 2.09204  | 1.22191  | -0.47434 |
| O                                                                                  | 2.71507  | 2.61670  | -0.48635 |
| C                                                                                  | 3.23970  | 3.90136  | -0.15357 |
| C                                                                                  | 2.78067  | 4.86168  | -1.23019 |
| H                                                                                  | 4.33132  | 3.84276  | -0.09651 |
| H                                                                                  | 2.87833  | 4.19785  | 0.83688  |
| H                                                                                  | 3.15621  | 5.86715  | -1.02509 |
| H                                                                                  | 3.14942  | 4.54400  | -2.20800 |
| H                                                                                  | 1.68902  | 4.89816  | -1.26994 |
| H                                                                                  | 0.00393  | 2.02076  | -1.92479 |
| H                                                                                  | 0.25708  | 1.95451  | -0.10644 |
| <b>M2c'</b>                                                                        |          |          |          |
|  |          |          |          |
| C                                                                                  | 3.46468  | 0.15244  | 2.24722  |
| C                                                                                  | 3.77578  | 1.37522  | 1.54156  |
| C                                                                                  | 2.87173  | 2.32760  | 1.18842  |
| C                                                                                  | 2.30389  | -0.52161 | 2.16078  |
| C                                                                                  | 1.44773  | 2.29774  | 1.43224  |
| C                                                                                  | 1.19929  | -0.17320 | 1.20119  |
| C                                                                                  | 0.65929  | 1.20449  | 1.52944  |
| H                                                                                  | 4.82940  | 1.60030  | 1.39552  |
| H                                                                                  | 3.26688  | 3.25825  | 0.78427  |
| H                                                                                  | 0.96684  | 3.26467  | 1.56972  |
| H                                                                                  | 2.13094  | -1.37846 | 2.80579  |
| H                                                                                  | 4.23476  | -0.23681 | 2.90901  |
| H                                                                                  | 0.37946  | -0.88999 | 1.31885  |
| C                                                                                  | -0.76478 | 1.30986  | 2.03824  |
| P                                                                                  | 1.66986  | -0.37987 | -0.60383 |
| C                                                                                  | 1.61909  | 1.14672  | -1.56893 |
| H                                                                                  | 0.69599  | 1.66377  | -1.29607 |
| H                                                                                  | 2.46975  | 1.78703  | -1.34203 |
| H                                                                                  | 1.59914  | 0.87732  | -2.62727 |
| C                                                                                  | 0.52116  | -1.51542 | -1.42950 |
| H                                                                                  | 0.11537  | -2.24183 | -0.72274 |
| H                                                                                  | -0.29624 | -0.92212 | -1.85530 |
| H                                                                                  | 1.06701  | -2.03246 | -2.22224 |
| C                                                                                  | 3.30767  | -1.14054 | -0.73995 |
| C                                                                                  | 4.42011  | -0.41998 | -1.17658 |
| C                                                                                  | 3.44342  | -2.48619 | -0.38197 |

|                                                                                     |          |          |          |       |          |          |          |
|-------------------------------------------------------------------------------------|----------|----------|----------|-------|----------|----------|----------|
| N                                                                                   | 2.16265  | -1.12739 | -0.50656 | C     | 5.66177  | -1.04425 | -1.25736 |
| C                                                                                   | 2.74153  | 2.51295  | -0.22579 | H     | 4.32823  | 0.62665  | -1.44811 |
| H                                                                                   | 3.76874  | 2.31766  | 0.06509  | C     | 4.68677  | -3.10366 | -0.45809 |
| H                                                                                   | 2.70786  | 3.11951  | -1.13131 | H     | 2.58140  | -3.05538 | -0.04284 |
| H                                                                                   | 2.20468  | 3.03224  | 0.57105  | C     | 5.79562  | -2.38236 | -0.89639 |
| C                                                                                   | 2.89311  | -2.38128 | -0.29368 | H     | 6.52370  | -0.48385 | -1.60302 |
| H                                                                                   | 2.78899  | -3.01024 | -1.17755 | H     | 4.78910  | -4.14638 | -0.17798 |
| H                                                                                   | 3.93481  | -2.13376 | -0.11609 | H     | 6.76502  | -2.86541 | -0.95859 |
| H                                                                                   | 2.46813  | -2.90255 | 0.56739  | C     | -2.15550 | -0.63983 | 2.49410  |
| C                                                                                   | -0.01369 | -2.01929 | 2.15049  | C     | -1.68748 | 0.21041  | 1.54703  |
| H                                                                                   | -0.13002 | -2.03099 | 3.23653  | H     | -1.89809 | -0.49829 | 3.53872  |
| H                                                                                   | 0.79261  | -1.30937 | 1.90797  | H     | -2.83939 | -1.44804 | 2.26520  |
| H                                                                                   | -0.94689 | -1.64134 | 1.70775  | C     | -1.89557 | 0.00883  | 0.12765  |
| O                                                                                   | 0.28564  | -3.33294 | 1.73503  | C     | -2.54686 | -1.28727 | -0.30443 |
| H                                                                                   | 0.25718  | -3.33048 | 0.76696  | H     | -2.30887 | -1.46029 | -1.35880 |
| O                                                                                   | -0.02348 | 3.36620  | 1.69234  | H     | -2.13883 | -2.13190 | 0.27103  |
| H                                                                                   | -0.02470 | 3.34281  | 0.72422  | C     | -4.06134 | -1.31215 | -0.18327 |
| C                                                                                   | -0.18074 | 2.03402  | 2.12635  | C     | -4.73000 | -2.31160 | 0.52423  |
| H                                                                                   | -0.31899 | 2.05005  | 3.20974  | C     | -4.82249 | -0.32629 | -0.82194 |
| H                                                                                   | -1.05658 | 1.54586  | 1.67413  | C     | -6.12236 | -2.32751 | 0.60636  |
| H                                                                                   | 0.70535  | 1.41644  | 1.91080  | H     | -4.15064 | -3.08782 | 1.02062  |
| R1-2sol-1                                                                           |          |          |          | C     | -6.21079 | -0.34083 | -0.74821 |
| 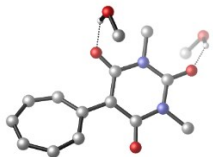 |          |          |          | H     | -4.30451 | 0.44214  | -1.38993 |
| C                                                                                   | -5.06799 | 0.57247  | -1.10432 | C     | -6.86791 | -1.34050 | -0.02954 |
| C                                                                                   | -5.29847 | -0.46377 | -0.24446 | H     | -6.62208 | -3.11047 | 1.16924  |
| C                                                                                   | -4.32539 | -1.29289 | 0.36753  | H     | -6.78604 | 0.42927  | -1.25392 |
| C                                                                                   | -3.80761 | 1.02401  | -1.56949 | H     | -7.95177 | -1.34828 | 0.03145  |
| C                                                                                   | -2.95482 | -1.26274 | 0.33488  | C     | -1.68016 | 0.93578  | -0.90718 |
| C                                                                                   | -2.53371 | 0.64149  | -1.24024 | O     | -1.79661 | 0.71618  | -2.13090 |
| C                                                                                   | -2.05215 | -0.35554 | -0.31978 | O     | -1.26658 | 2.21166  | -0.51794 |
| H                                                                                   | -6.33342 | -0.69261 | -0.00721 | C     | -1.31822 | 3.21131  | -1.52749 |
| H                                                                                   | -4.73702 | -2.07657 | 0.99888  | C     | -0.59325 | 4.42805  | -0.98673 |
| H                                                                                   | -2.47337 | -2.02514 | 0.92951  | H     | -2.36451 | 3.44178  | -1.76318 |
| H                                                                                   | -3.85932 | 1.80730  | -2.32169 | H     | -0.85622 | 2.84323  | -2.44855 |
| H                                                                                   | -5.93519 | 1.09289  | -1.50059 | H     | -0.63428 | 5.25057  | -1.70524 |
| H                                                                                   | -1.75878 | 1.16999  | -1.77578 | H     | -1.04700 | 4.76195  | -0.04975 |
| C                                                                                   | -0.65310 | -0.46327 | -0.08891 | H     | 0.45741  | 4.19039  | -0.79087 |
| C                                                                                   | -0.05083 | -1.70968 | 0.37610  | H     | -0.73129 | 1.26613  | 3.13372  |
|                                                                                     |          |          |          | H     | -1.14083 | 2.29808  | 1.76594  |
|                                                                                     |          |          |          | TS3c' |          |          |          |
|                                                                                     |          |          |          | C     | 3.83214  | 1.12380  | 1.61430  |
|                                                                                     |          |          |          | C     | 3.70758  | 2.46559  | 1.21038  |
|                                                                                     |          |          |          | C     | 2.54296  | 3.18716  | 1.04695  |

|                |          |          |          |   |          |          |          |
|----------------|----------|----------|----------|---|----------|----------|----------|
| C              | 0.20732  | 0.69459  | -0.27636 | C | 2.83102  | 0.20351  | 1.86022  |
| C              | 2.17069  | -0.62188 | 0.41568  | C | 1.20968  | 2.78036  | 1.25361  |
| O              | 3.36953  | -0.69053 | 0.64988  | C | 1.43283  | 0.33814  | 1.73482  |
| O              | -0.63542 | -2.77264 | 0.55095  | C | 0.68281  | 1.54637  | 1.59063  |
| O              | -0.18671 | 1.82449  | -0.58064 | H | 4.63723  | 3.00014  | 1.03697  |
| N              | 1.57675  | 0.53764  | -0.04687 | H | 2.66489  | 4.22804  | 0.75665  |
| N              | 1.33314  | -1.70063 | 0.60400  | H | 0.47174  | 3.57016  | 1.14469  |
| C              | 2.40959  | 1.73734  | -0.20145 | H | 3.16888  | -0.78746 | 2.15370  |
| H              | 3.45430  | 1.44134  | -0.22244 | H | 4.84716  | 0.76061  | 1.75218  |
| H              | 2.13980  | 2.22171  | -1.13910 | H | 0.83891  | -0.50837 | 2.06916  |
| H              | 2.21868  | 2.43345  | 0.61922  | C | -0.79666 | 1.47575  | 1.90472  |
| C              | 1.91794  | -2.96601 | 1.05017  | P | 1.35632  | -0.74565 | -0.71800 |
| H              | 1.76048  | -3.73007 | 0.28784  | C | 1.77518  | 0.77011  | -1.66954 |
| H              | 2.97792  | -2.80560 | 1.21871  | H | 0.84166  | 1.30256  | -1.86631 |
| H              | 1.42489  | -3.28695 | 1.96787  | H | 2.42980  | 1.42058  | -1.08519 |
| O              | 0.27367  | 3.53656  | 1.60872  | H | 2.25834  | 0.51806  | -2.61813 |
| H              | 0.11447  | 3.22492  | 0.70470  | C | 0.41490  | -1.69575 | -1.98710 |
| C              | -0.02698 | 2.45331  | 2.45858  | H | -0.01774 | -2.59846 | -1.55224 |
| H              | 0.02963  | 2.81097  | 3.48920  | H | -0.39506 | -1.04574 | -2.33329 |
| H              | -1.03556 | 2.05345  | 2.28666  | H | 1.06517  | -1.96316 | -2.82404 |
| H              | 0.69025  | 1.62434  | 2.35151  | C | 2.95072  | -1.65008 | -0.64334 |
| C              | 4.62874  | -0.23556 | -2.16929 | C | 4.18960  | -1.05967 | -0.91738 |
| H              | 5.05653  | 0.18244  | -3.08328 | C | 2.92836  | -2.97070 | -0.17004 |
| H              | 3.56180  | 0.03285  | -2.14013 | C | 5.37362  | -1.77442 | -0.73507 |
| H              | 4.70181  | -1.32974 | -2.22428 | H | 4.23779  | -0.03806 | -1.28333 |
| O              | 5.34443  | 0.29570  | -1.07758 | C | 4.10718  | -3.68581 | 0.00445  |
| H              | 4.92943  | -0.06796 | -0.28188 | H | 1.97637  | -3.44242 | 0.06504  |
| <b>R1-3sol</b> |          |          |          | C | 5.33571  | -3.08648 | -0.27539 |
| C              | 4.85812  | -1.64038 | -1.07942 | H | 6.32631  | -1.30301 | -0.95656 |
| C              | 5.14018  | -0.33743 | -0.76866 | H | 4.06999  | -4.70986 | 0.36213  |
| C              | 4.21204  | 0.68288  | -0.45625 | H | 6.25757  | -3.64160 | -0.13502 |
| C              | 3.57875  | -2.23759 | -1.16231 | C | -1.75398 | -0.71589 | 2.34952  |
| C              | 2.83950  | 0.67384  | -0.40588 | C | -1.48528 | 0.22010  | 1.40062  |
| C              | 2.32299  | -1.71591 | -0.96993 | H | -1.51435 | -0.52634 | 3.39100  |
| C              | 1.90164  | -0.38703 | -0.63604 | H | -2.25685 | -1.64837 | 2.13071  |
| H              | 6.18729  | -0.04981 | -0.74316 | C | -1.76542 | 0.04029  | -0.00196 |
| H              | 4.65976  | 1.63787  | -0.19333 | C | -2.44749 | -1.25189 | -0.39628 |
| H              | 2.40896  | 1.61922  | -0.10439 | H | -2.36180 | -1.36841 | -1.47952 |
| H              | 3.58845  | -3.28701 | -1.44589 | H | -1.94249 | -2.11349 | 0.06528  |
| H              | 5.70039  | -2.29328 | -1.28892 | C | -3.92573 | -1.30546 | -0.05323 |
| H              | 1.51641  | -2.41857 | -1.12424 | C | -4.47808 | -2.34029 | 0.70144  |
| C              | 0.50499  | -0.11847 | -0.50285 | C | -4.77755 | -0.30396 | -0.53275 |
| C              | -0.01251 | 1.21215  | -0.74589 | C | -5.84356 | -2.37587 | 0.98338  |
| C              | -0.40960 | -1.15467 | -0.06491 | H | -3.82861 | -3.13066 | 1.07302  |

|                                                                                      |          |          |          |
|--------------------------------------------------------------------------------------|----------|----------|----------|
| C                                                                                    | -2.25450 | 0.47875  | -0.03557 |
| O                                                                                    | -3.41881 | 0.75539  | 0.21516  |
| O                                                                                    | 0.64165  | 2.16105  | -1.18824 |
| O                                                                                    | -0.08355 | -2.30903 | 0.22843  |
| N                                                                                    | -1.75252 | -0.79955 | 0.10886  |
| N                                                                                    | -1.36533 | 1.43619  | -0.48641 |
| C                                                                                    | -2.64817 | -1.83152 | 0.64855  |
| H                                                                                    | -3.67671 | -1.55618 | 0.43178  |
| H                                                                                    | -2.40160 | -2.77533 | 0.16669  |
| H                                                                                    | -2.49175 | -1.92999 | 1.72611  |
| C                                                                                    | -1.85889 | 2.79304  | -0.72788 |
| H                                                                                    | -1.69126 | 3.05905  | -1.77181 |
| H                                                                                    | -2.91738 | 2.81278  | -0.48888 |
| H                                                                                    | -1.31383 | 3.49921  | -0.09785 |
| C                                                                                    | 0.85498  | 2.66839  | 1.94927  |
| H                                                                                    | 1.14182  | 2.93749  | 2.96804  |
| H                                                                                    | -0.24092 | 2.72378  | 1.87927  |
| H                                                                                    | 1.15296  | 1.62124  | 1.78056  |
| O                                                                                    | 1.50292  | 3.56112  | 1.07017  |
| H                                                                                    | 1.18340  | 3.36910  | 0.17508  |
| O                                                                                    | -0.38657 | -2.21831 | 3.04483  |
| H                                                                                    | -0.30610 | -2.56144 | 2.14194  |
| C                                                                                    | 0.14414  | -0.91353 | 3.03148  |
| H                                                                                    | 0.23547  | -0.57656 | 4.06673  |
| H                                                                                    | 1.13975  | -0.87114 | 2.56643  |
| H                                                                                    | -0.50789 | -0.19874 | 2.50327  |
| C                                                                                    | -4.85914 | -0.83362 | -2.02654 |
| H                                                                                    | -5.40590 | -1.52065 | -2.67612 |
| H                                                                                    | -3.83405 | -1.21863 | -1.91306 |
| H                                                                                    | -4.80273 | 0.14179  | -2.52720 |
| O                                                                                    | -5.54591 | -0.76637 | -0.79737 |
| H                                                                                    | -5.06465 | -0.12470 | -0.25502 |
| <b>M1<sup>2</sup>-sol</b>                                                            |          |          |          |
| 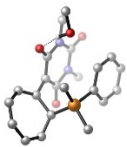  |          |          |          |
| C                                                                                    | -4.57725 | -0.78653 | -0.62946 |
| C                                                                                    | -4.62885 | 0.61707  | -0.99610 |
| C                                                                                    | -3.61638 | 1.32824  | -1.53966 |
| C                                                                                    | -3.48801 | -1.53017 | -0.38142 |
| C                                                                                    | -2.25364 | 0.92725  | -1.83060 |
| C                                                                                    | -2.05377 | -1.07934 | -0.29860 |
| C                                                                                    | -6.14039 | -0.33742 | -0.26009 |
| H                                                                                    | -4.35106 | 0.49331  | -1.13673 |
| C                                                                                    | -6.67956 | -1.37280 | 0.50418  |
| H                                                                                    | -6.25188 | -3.18708 | 1.57932  |
| H                                                                                    | -6.78833 | 0.44461  | -0.64543 |
| H                                                                                    | -7.74309 | -1.39646 | 0.72118  |
| C                                                                                    | -1.60960 | 0.96972  | -1.05608 |
| O                                                                                    | -1.89871 | 0.76994  | -2.24858 |
| O                                                                                    | -1.06409 | 2.21478  | -0.73320 |
| C                                                                                    | -1.14738 | 3.17877  | -1.77794 |
| C                                                                                    | -0.39428 | 4.41649  | -1.33564 |
| H                                                                                    | -2.19957 | 3.40781  | -1.98392 |
| H                                                                                    | -0.72610 | 2.76985  | -2.70079 |
| H                                                                                    | -0.46836 | 5.19445  | -2.09976 |
| H                                                                                    | -0.80658 | 4.81406  | -0.40318 |
| H                                                                                    | 0.66523  | 4.18696  | -1.18231 |
| H                                                                                    | -0.88266 | 1.49178  | 2.99943  |
| H                                                                                    | -1.28078 | 2.37508  | 1.52517  |
| <b>R2d</b>                                                                           |          |          |          |
|  |          |          |          |
| C                                                                                    | 3.66481  | -0.61977 | 0.50288  |
| C                                                                                    | 3.68314  | 0.73207  | 0.44423  |
| C                                                                                    | 2.72902  | 1.56096  | -0.24607 |
| C                                                                                    | 2.68497  | -1.48133 | -0.10687 |
| C                                                                                    | 1.45540  | 1.28819  | -0.60656 |
| C                                                                                    | 1.42127  | -1.20238 | -0.49541 |
| C                                                                                    | 0.68996  | 0.06378  | -0.33564 |
| H                                                                                    | 4.53643  | 1.24649  | 0.87738  |
| H                                                                                    | 3.08096  | 2.55975  | -0.49357 |
| H                                                                                    | 0.92543  | 2.06819  | -1.13758 |
| H                                                                                    | 3.00029  | -2.51271 | -0.24574 |
| H                                                                                    | 4.50335  | -1.11764 | 0.98151  |
| H                                                                                    | 0.85699  | -2.01943 | -0.93196 |
| C                                                                                    | -0.64996 | 0.04353  | -0.10753 |
| C                                                                                    | -1.37330 | -1.27262 | 0.02814  |
| F                                                                                    | -0.79646 | -2.08023 | 0.93321  |
| F                                                                                    | -2.64826 | -1.11262 | 0.39852  |
| F                                                                                    | -1.39393 | -1.96051 | -1.13323 |
| C                                                                                    | -1.53986 | 1.23767  | 0.08453  |

|   |          |          |          |                                                                                    |          |          |          |
|---|----------|----------|----------|------------------------------------------------------------------------------------|----------|----------|----------|
| C | -1.52025 | -0.09284 | -1.32335 | F                                                                                  | -2.09355 | 1.24051  | 1.30830  |
| H | -5.59668 | 1.10240  | -0.90495 | F                                                                                  | -0.90351 | 2.40990  | -0.04320 |
| H | -3.85035 | 2.34786  | -1.83966 | F                                                                                  | -2.55274 | 1.24458  | -0.79916 |
| H | -1.71071 | 1.60647  | -2.47910 | TS2d                                                                               |          |          |          |
| H | -3.63796 | -2.58926 | -0.18535 | 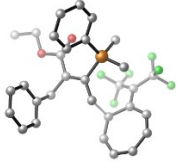 |          |          |          |
| H | -5.53722 | -1.29821 | -0.58863 |                                                                                    |          |          |          |
| H | -1.42945 | -1.97591 | -0.37733 |                                                                                    |          |          |          |
| C | -0.05970 | -0.13763 | -1.49151 |                                                                                    |          |          |          |
| C | 0.68799  | 1.05698  | -1.31397 |                                                                                    |          |          |          |
| C | 0.61443  | -1.39882 | -1.55398 |                                                                                    |          |          |          |
| C | 2.78092  | -0.25579 | -1.23342 | C                                                                                  | 0.17016  | 1.40525  | -0.77035 |
| O | 3.99219  | -0.30031 | -1.06502 | C                                                                                  | -0.39713 | 0.26068  | -0.19958 |
| O | 0.20921  | 2.20614  | -1.16727 | H                                                                                  | -0.26481 | 2.36269  | -0.51474 |
| O | 0.06779  | -2.50256 | -1.67581 | H                                                                                  | 0.67125  | 1.38280  | -1.72833 |
| N | 2.01698  | -1.38549 | -1.44077 | C                                                                                  | -1.21785 | 0.27954  | 0.93380  |
| N | 2.08571  | 0.94125  | -1.23642 | C                                                                                  | -1.60234 | 1.60165  | 1.55248  |
| C | 2.68945  | -2.67686 | -1.50862 | H                                                                                  | -1.96749 | 1.42476  | 2.56684  |
| H | 3.74775  | -2.51365 | -1.32548 | H                                                                                  | -0.72171 | 2.24973  | 1.64336  |
| H | 2.26567  | -3.34654 | -0.75915 | C                                                                                  | -2.67070 | 2.33603  | 0.75928  |
| H | 2.53469  | -3.12306 | -2.49305 | C                                                                                  | -3.86521 | 1.68546  | 0.42845  |
| C | 2.85125  | 2.16102  | -0.99568 | C                                                                                  | -2.49300 | 3.65580  | 0.34295  |
| H | 3.89398  | 1.95409  | -1.21895 | C                                                                                  | -4.85209 | 2.33894  | -0.30226 |
| H | 2.46318  | 2.94974  | -1.63928 | H                                                                                  | -4.01251 | 0.65855  | 0.75490  |
| H | 2.74743  | 2.47679  | 0.04789  | C                                                                                  | -3.47888 | 4.31422  | -0.39170 |
| P | -1.57632 | -0.41778 | 1.37112  | H                                                                                  | -1.56940 | 4.17299  | 0.59588  |
| C | -2.59576 | -1.23198 | 2.62853  | C                                                                                  | -4.66065 | 3.65701  | -0.71783 |
| H | -3.64726 | -1.02579 | 2.41820  | H                                                                                  | -5.77572 | 1.82179  | -0.54499 |
| H | -2.43000 | -2.31109 | 2.59440  | H                                                                                  | -3.31960 | 5.33935  | -0.71138 |
| H | -2.32538 | -0.85384 | 3.61608  | H                                                                                  | -5.42914 | 4.16639  | -1.29028 |
| C | -1.84114 | 1.36205  | 1.46152  | C                                                                                  | -1.73956 | -0.94876 | 1.45933  |
| H | -1.28170 | 1.84913  | 0.65670  | O                                                                                  | -1.48623 | -2.07397 | 1.02023  |
| H | -2.90872 | 1.54828  | 1.31934  | O                                                                                  | -2.58389 | -0.79217 | 2.50591  |
| H | -1.50872 | 1.74505  | 2.42840  | C                                                                                  | -3.11321 | -2.00018 | 3.06094  |
| C | 0.15597  | -0.80788 | 1.69224  | C                                                                                  | -4.03185 | -1.60368 | 4.19621  |
| C | 0.54213  | -2.15383 | 1.70630  | H                                                                                  | -2.28639 | -2.62902 | 3.40495  |
| C | 1.11058  | 0.20517  | 1.83473  | H                                                                                  | -3.64301 | -2.55161 | 2.27843  |
| C | 1.88334  | -2.48414 | 1.86369  | H                                                                                  | -4.46497 | -2.49516 | 4.65561  |
| H | -0.19201 | -2.94470 | 1.57385  | H                                                                                  | -3.48102 | -1.05130 | 4.96079  |
| C | 2.45174  | -0.13984 | 1.98181  | H                                                                                  | -4.84402 | -0.97137 | 3.82998  |
| H | 0.83387  | 1.25737  | 1.80342  | P                                                                                  | -0.11849 | -1.29069 | -1.10859 |
| C | 2.83931  | -1.47752 | 1.98919  | C                                                                                  | 0.78138  | -2.65719 | -0.31574 |
| H | 2.18336  | -3.52681 | 1.87110  | H                                                                                  | 1.66993  | -2.89057 | -0.90188 |
| H | 3.19766  | 0.64348  | 2.06923  | H                                                                                  | 1.06018  | -2.34352 | 0.68858  |
| H | 3.88898  | -1.73511 | 2.08258  | H                                                                                  | 0.11597  | -3.51528 | -0.22955 |



|                                                                                   |          |          |          |     |          |          |          |
|-----------------------------------------------------------------------------------|----------|----------|----------|-----|----------|----------|----------|
| O                                                                                 | 0.72215  | 3.37147  | 1.22132  | C   | 0.85264  | -0.89773 | -2.59728 |
| H                                                                                 | 0.57723  | 3.04522  | 0.30705  | H   | 1.82198  | -0.47212 | -2.32955 |
| C                                                                                 | 1.16763  | 4.70670  | 1.14775  | H   | 1.01089  | -1.83729 | -3.13371 |
| H                                                                                 | 0.43270  | 5.36235  | 0.66346  | H   | 0.29896  | -0.21069 | -3.23784 |
| H                                                                                 | 1.32647  | 5.06850  | 2.16673  | C   | -1.71017 | -1.83469 | -1.78554 |
| H                                                                                 | 2.11851  | 4.79769  | 0.60409  | C   | -1.86436 | -3.13736 | -2.26309 |
| M1'-sol-1                                                                         |          |          |          | C   | -2.75535 | -0.91463 | -1.90155 |
| 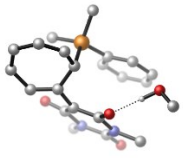 |          |          |          | C   | -3.06988 | -3.52400 | -2.84136 |
| C                                                                                 | 4.36848  | 1.08383  | -0.83919 | H   | -1.05384 | -3.85668 | -2.18379 |
| C                                                                                 | 4.76189  | -0.30556 | -0.99266 | C   | -3.95893 | -1.31042 | -2.47777 |
| C                                                                                 | 3.94190  | -1.32589 | -1.32760 | H   | -2.63791 | 0.10096  | -1.53358 |
| C                                                                                 | 3.13802  | 1.57048  | -0.61559 | C   | -4.11821 | -2.61269 | -2.94514 |
| C                                                                                 | 2.50935  | -1.32501 | -1.55440 | H   | -3.19028 | -4.53843 | -3.20640 |
| C                                                                                 | 1.86810  | 0.80655  | -0.34770 | H   | -4.77216 | -0.59617 | -2.55721 |
| C                                                                                 | 1.56334  | -0.44027 | -1.15905 | H   | -5.05856 | -2.91827 | -3.39201 |
| H                                                                                 | 5.82521  | -0.51507 | -0.91532 | C   | 2.56122  | 4.09674  | -0.70485 |
| H                                                                                 | 4.41461  | -2.29291 | -1.48724 | C   | 3.20750  | 3.69140  | -1.86300 |
| H                                                                                 | 2.12867  | -2.21910 | -2.03795 | C   | 3.67210  | 2.39751  | -2.14316 |
| H                                                                                 | 3.02221  | 2.65149  | -0.59642 | C   | 2.07067  | 3.29235  | 0.31962  |
| H                                                                                 | 5.16622  | 1.81468  | -0.95809 | C   | 3.64419  | 1.23414  | -1.39669 |
| H                                                                                 | 1.03616  | 1.49972  | -0.51269 | C   | 2.00623  | 1.89118  | 0.40063  |
| C                                                                                 | 0.13595  | -0.79273 | -1.22708 | C   | 2.97665  | 0.94219  | -0.16706 |
| C                                                                                 | -0.26508 | -2.08550 | -0.75532 | H   | 3.44117  | 4.45667  | -2.59643 |
| C                                                                                 | -0.84096 | 0.20504  | -1.46361 | H   | 4.22877  | 2.30932  | -3.07416 |
| C                                                                                 | -2.63422 | -1.37079 | -0.85871 | H   | 4.24148  | 0.43358  | -1.81378 |
| O                                                                                 | -3.81726 | -1.60120 | -0.64729 | H   | 1.51977  | 3.81176  | 1.10150  |
| O                                                                                 | 0.48315  | -2.98989 | -0.35939 | H   | 2.38235  | 5.16396  | -0.59685 |
| O                                                                                 | -0.59149 | 1.38882  | -1.79198 | H   | 1.50070  | 1.53172  | 1.28824  |
| N                                                                                 | -2.19046 | -0.14001 | -1.30469 | C   | 3.15851  | -0.27715 | 0.48960  |
| N                                                                                 | -1.65238 | -2.32435 | -0.67213 | C   | 3.96403  | -1.37269 | -0.12598 |
| C                                                                                 | -3.18368 | 0.89474  | -1.57626 | C   | 2.81652  | -0.41034 | 1.94087  |
| H                                                                                 | -4.16442 | 0.42774  | -1.56429 | F   | 3.07405  | 0.71903  | 2.63659  |
| H                                                                                 | -3.13057 | 1.68320  | -0.81986 | F   | 3.50863  | -1.37760 | 2.55964  |
| H                                                                                 | -2.97664 | 1.33597  | -2.55225 | F   | 1.50486  | -0.67835 | 2.18042  |
| C                                                                                 | -2.06160 | -3.62718 | -0.16307 | F   | 3.79591  | -2.56335 | 0.47016  |
| H                                                                                 | -3.12598 | -3.74409 | -0.34556 | F   | 3.62013  | -1.59230 | -1.42802 |
| H                                                                                 | -1.48857 | -4.39982 | -0.67290 | F   | 5.29340  | -1.13981 | -0.15415 |
| H                                                                                 | -1.85790 | -3.70316 | 0.90986  | M2d |          |          |          |
| P                                                                                 | 1.64273  | 0.34456  | 1.43591  |     |          |          |          |

|                  |          |          |          |                                                                                    |          |          |          |
|------------------|----------|----------|----------|------------------------------------------------------------------------------------|----------|----------|----------|
| C                | 2.42349  | 1.61671  | 2.46174  |                                                                                    |          |          |          |
| H                | 3.48159  | 1.68165  | 2.19933  |                                                                                    |          |          |          |
| H                | 1.94689  | 2.58104  | 2.26989  |                                                                                    |          |          |          |
| H                | 2.30974  | 1.35922  | 3.51609  |                                                                                    |          |          |          |
| C                | 2.39433  | -1.25789 | 1.78065  |                                                                                    |          |          |          |
| H                | 1.92758  | -2.00798 | 1.12998  |                                                                                    |          |          |          |
| H                | 3.45878  | -1.19141 | 1.54359  |                                                                                    |          |          |          |
| H                | 2.25725  | -1.51316 | 2.83391  |                                                                                    |          |          |          |
| C                | -0.11806 | 0.28619  | 1.81479  |                                                                                    |          |          |          |
| C                | -0.87060 | 1.45228  | 1.63798  |                                                                                    |          |          |          |
| C                | -0.74587 | -0.91385 | 2.16587  |                                                                                    |          |          |          |
| C                | -2.25097 | 1.41404  | 1.80481  |                                                                                    |          |          |          |
| H                | -0.41050 | 2.38900  | 1.33249  |                                                                                    |          |          |          |
| C                | -2.12634 | -0.93881 | 2.33916  |                                                                                    |          |          |          |
| H                | -0.17534 | -1.83439 | 2.25305  |                                                                                    |          |          |          |
| C                | -2.87872 | 0.21943  | 2.15175  |                                                                                    |          |          |          |
| H                | -2.82181 | 2.31884  | 1.62768  |                                                                                    |          |          |          |
| H                | -2.62015 | -1.87185 | 2.59058  |                                                                                    |          |          |          |
| H                | -3.95785 | 0.18229  | 2.25622  |                                                                                    |          |          |          |
| C                | -1.93905 | 4.46686  | -1.36628 |                                                                                    |          |          |          |
| H                | -2.25460 | 5.38480  | -0.86365 |                                                                                    |          |          |          |
| H                | -1.12184 | 4.71649  | -2.05526 |                                                                                    |          |          |          |
| H                | -2.78542 | 4.09733  | -1.96202 |                                                                                    |          |          |          |
| O                | -1.54029 | 3.54164  | -0.37980 |                                                                                    |          |          |          |
| H                | -1.23550 | 2.74051  | -0.85389 |                                                                                    |          |          |          |
| <b>M1'-sol-2</b> |          |          |          |                                                                                    |          |          |          |
|                  |          |          |          | 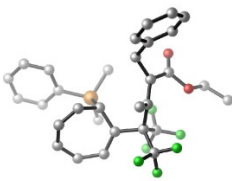 |          |          |          |
| C                | -4.87096 | 0.36235  | 1.24691  | C                                                                                  | -3.09099 | 0.48932  | 2.26097  |
| C                | -5.17359 | -0.84329 | 0.49650  | C                                                                                  | -3.78570 | -0.75156 | 1.99100  |
| C                | -4.29915 | -1.82691 | 0.19051  | C                                                                                  | -3.18305 | -1.91250 | 1.63057  |
| C                | -3.66984 | 0.91790  | 1.47037  | C                                                                                  | -1.95845 | 0.87405  | 1.65278  |
| C                | -2.87694 | -1.92048 | 0.45711  | C                                                                                  | -1.76727 | -2.13730 | 1.40935  |
| C                | -2.33132 | 0.51456  | 0.91340  | C                                                                                  | -1.33069 | 0.13587  | 0.50233  |
| C                | -1.97831 | -0.95540 | 0.76687  | C                                                                                  | -0.87405 | -1.23917 | 0.94192  |
| H                | -6.21755 | -0.99701 | 0.23794  | H                                                                                  | -4.84700 | -0.78507 | 2.22418  |
| H                | -4.71384 | -2.70295 | -0.30419 | H                                                                                  | -3.80338 | -2.80589 | 1.60088  |
| H                | -2.45206 | -2.90527 | 0.29279  | H                                                                                  | -1.42136 | -3.14357 | 1.62616  |
| H                | -3.63943 | 1.79461  | 2.11327  | H                                                                                  | -1.43180 | 1.76308  | 1.98937  |
| H                | -5.72479 | 0.85009  | 1.71370  | H                                                                                  | -3.51211 | 1.13191  | 3.03026  |
|                  |          |          |          | H                                                                                  | -0.44431 | 0.68178  | 0.17431  |
|                  |          |          |          | C                                                                                  | 0.62412  | -1.57287 | 0.75577  |
|                  |          |          |          | P                                                                                  | -2.30716 | 0.15446  | -1.07881 |
|                  |          |          |          | C                                                                                  | -2.72434 | -1.48170 | -1.72779 |
|                  |          |          |          | H                                                                                  | -1.80685 | -2.05244 | -1.87028 |
|                  |          |          |          | H                                                                                  | -3.37188 | -2.01308 | -1.03035 |
|                  |          |          |          | H                                                                                  | -3.22547 | -1.34775 | -2.68949 |
|                  |          |          |          | C                                                                                  | -1.25294 | 0.98653  | -2.29492 |
|                  |          |          |          | H                                                                                  | -1.08831 | 2.01832  | -1.97390 |
|                  |          |          |          | H                                                                                  | -0.27341 | 0.50034  | -2.35437 |
|                  |          |          |          | H                                                                                  | -1.75107 | 0.98548  | -3.26668 |
|                  |          |          |          | C                                                                                  | -3.82073 | 1.12373  | -0.91690 |
|                  |          |          |          | C                                                                                  | -5.07738 | 0.51926  | -0.99235 |
|                  |          |          |          | C                                                                                  | -3.71706 | 2.49830  | -0.67697 |
|                  |          |          |          | C                                                                                  | -6.22555 | 1.29121  | -0.84093 |
|                  |          |          |          | H                                                                                  | -5.16922 | -0.54857 | -1.16378 |
|                  |          |          |          | C                                                                                  | -4.86733 | 3.26296  | -0.52354 |
|                  |          |          |          | H                                                                                  | -2.74385 | 2.97579  | -0.59728 |
|                  |          |          |          | C                                                                                  | -6.12065 | 2.65969  | -0.60753 |
|                  |          |          |          | H                                                                                  | -7.20111 | 0.82180  | -0.90702 |
|                  |          |          |          | H                                                                                  | -4.78463 | 4.32818  | -0.33778 |
|                  |          |          |          | H                                                                                  | -7.01798 | 3.25825  | -0.49017 |
|                  |          |          |          | C                                                                                  | 1.52285  | 0.28957  | 2.10399  |
|                  |          |          |          | C                                                                                  | 1.43867  | -0.21542 | 0.85070  |
|                  |          |          |          | H                                                                                  | 1.11952  | -0.19326 | 2.98214  |

|   |          |          |          |      |          |          |          |
|---|----------|----------|----------|------|----------|----------|----------|
| H | -1.56276 | 0.95382  | 1.55928  | H    | 2.01835  | 1.24165  | 2.25352  |
| C | -0.53263 | -1.21476 | 0.67739  | C    | 1.65961  | 0.63696  | -0.30573 |
| C | -0.04089 | -1.93649 | -0.45478 | C    | 1.43693  | 2.13171  | -0.16266 |
| C | 0.36654  | -0.53321 | 1.55148  | H    | 1.17485  | 2.51593  | -1.15751 |
| C | 2.26209  | -1.33965 | 0.19744  | H    | 0.58922  | 2.33781  | 0.51198  |
| O | 3.47621  | -1.37439 | -0.02717 | C    | 2.61864  | 2.95095  | 0.33371  |
| O | -0.71457 | -2.45023 | -1.35931 | C    | 2.52877  | 3.75793  | 1.46853  |
| O | 0.03536  | 0.14918  | 2.52964  | C    | 3.83046  | 2.92016  | -0.36656 |
| N | 1.74791  | -0.62582 | 1.24656  | C    | 3.61860  | 4.51068  | 1.90597  |
| N | 1.36547  | -2.01796 | -0.59012 | H    | 1.59272  | 3.78891  | 2.02361  |
| C | 2.71245  | 0.04689  | 2.11124  | C    | 4.91806  | 3.67153  | 0.06342  |
| H | 3.29581  | -0.69087 | 2.66901  | H    | 3.90160  | 2.30694  | -1.26095 |
| H | 3.39164  | 0.65055  | 1.50698  | C    | 4.81829  | 4.46939  | 1.20361  |
| H | 2.14745  | 0.67152  | 2.79719  | H    | 3.52951  | 5.12593  | 2.79669  |
| C | 1.88215  | -2.72946 | -1.75320 | H    | 5.84990  | 3.63732  | -0.49339 |
| H | 2.92091  | -2.98642 | -1.56503 | H    | 5.67004  | 5.05295  | 1.53909  |
| H | 1.27698  | -3.61959 | -1.90967 | C    | 2.27575  | 0.26592  | -1.52432 |
| H | 1.81667  | -2.10433 | -2.65008 | O    | 2.23796  | 0.89373  | -2.59375 |
| P | -1.95864 | 1.28961  | -0.73192 | O    | 3.00164  | -0.89796 | -1.44123 |
| C | -2.81526 | 2.88336  | -0.83774 | C    | 3.40925  | -1.47364 | -2.67567 |
| H | -3.88588 | 2.71942  | -0.69746 | C    | 4.47829  | -2.50482 | -2.37484 |
| H | -2.45057 | 3.55026  | -0.05316 | H    | 3.78238  | -0.68817 | -3.33694 |
| H | -2.62651 | 3.33444  | -1.81348 | H    | 2.53963  | -1.93373 | -3.16528 |
| C | -2.53197 | 0.22232  | -2.06663 | H    | 4.82510  | -2.97179 | -3.30064 |
| H | -2.02636 | -0.74867 | -1.99024 | H    | 5.33135  | -2.02986 | -1.88442 |
| H | -3.60629 | 0.07087  | -1.93083 | H    | 4.09334  | -3.28319 | -1.71302 |
| H | -2.33694 | 0.69440  | -3.03196 | C    | 1.13006  | -2.55642 | 1.84968  |
| C | -0.18635 | 1.58149  | -0.88882 | C    | 0.70329  | -2.39151 | -0.56328 |
| C | 0.43467  | 2.44408  | 0.02238  | F    | 0.66601  | -2.26332 | 3.07082  |
| C | 0.57642  | 0.89504  | -1.83935 | F    | 0.73833  | -3.82831 | 1.61563  |
| C | 1.81201  | 2.62511  | -0.02896 | F    | 2.45857  | -2.57627 | 1.90164  |
| H | -0.14539 | 2.95734  | 0.78534  | F    | 1.84603  | -3.05381 | -0.70770 |
| C | 1.95439  | 1.08630  | -1.88324 | F    | -0.26804 | -3.33234 | -0.61733 |
| H | 0.10799  | 0.18230  | -2.51367 | F    | 0.47846  | -1.63615 | -1.65405 |
| C | 2.57403  | 1.94979  | -0.98148 | TS3d |          |          |          |
| H | 2.29489  | 3.28244  | 0.68645  | C    | -1.47098 | -0.12615 | -1.26886 |
| H | 2.54988  | 0.54151  | -2.60907 | C    | -0.68329 | 0.44300  | -0.08698 |
| H | 3.65263  | 2.06806  | -0.99325 | H    | -1.55638 | 0.58158  | -2.10964 |
| C | 6.21394  | 0.23067  | 0.91179  | H    | -2.49231 | -0.37287 | -0.97608 |
| H | 6.71197  | -0.67468 | 0.54186  | C    | 0.72924  | 0.36187  | -0.19291 |
| H | 6.97498  | 0.99809  | 1.07279  | C    | 1.36373  | 0.90531  | -1.48837 |
| H | 5.75401  | -0.00524 | 1.88146  | H    | 2.36079  | 0.49536  | -1.63864 |
| O | 5.27505  | 0.73589  | -0.01149 | H    | 0.74944  | 0.63337  | -2.34657 |
| H | 4.61328  | 0.03274  | -0.14091 | C    | 1.44658  | 2.41950  | -1.41902 |

## M1'-2sol

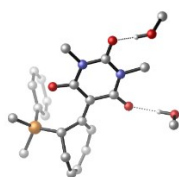

|   |          |          |          |
|---|----------|----------|----------|
| C | -2.67750 | 3.07536  | -1.54557 |
| C | -2.98366 | 3.23102  | -0.14733 |
| C | -2.28401 | 2.65259  | 0.86901  |
| C | -2.05229 | 2.01923  | -2.10302 |
| C | -1.14448 | 1.78077  | 0.80013  |
| C | -1.70408 | 0.73557  | -1.40752 |
| C | -0.78425 | 0.93456  | -0.20575 |
| H | -3.74536 | 3.96124  | 0.11427  |
| H | -2.55260 | 2.96652  | 1.87668  |
| H | -0.49882 | 1.79040  | 1.67117  |
| H | -1.77171 | 2.07345  | -3.15139 |
| H | -2.94626 | 3.90326  | -2.19863 |
| H | -1.18505 | 0.09477  | -2.11963 |
| C | 0.45514  | 0.17046  | -0.19590 |
| C | 1.64202  | 0.72097  | 0.38350  |
| C | 0.46037  | -1.14848 | -0.72326 |
| C | 2.86047  | -1.33214 | -0.24254 |
| O | 3.90421  | -1.98643 | -0.25947 |
| O | 1.71435  | 1.82485  | 0.93396  |
| O | -0.53572 | -1.75884 | -1.16300 |
| N | 1.68339  | -1.83531 | -0.75000 |
| N | 2.81215  | -0.07083 | 0.29771  |
| C | 1.67585  | -3.18722 | -1.29959 |
| H | 2.69901  | -3.55037 | -1.31112 |
| H | 1.04937  | -3.83544 | -0.68371 |
| H | 1.26229  | -3.16472 | -2.30812 |
| C | 4.06612  | 0.42196  | 0.87183  |
| H | 4.32799  | -0.17216 | 1.75125  |
| H | 4.86747  | 0.32951  | 0.13700  |
| H | 3.93357  | 1.46068  | 1.15905  |
| P | -3.17782 | -0.33135 | -1.00404 |
| C | -3.31233 | -1.61706 | -2.27339 |
| H | -3.45884 | -1.12119 | -3.23682 |
| H | -2.39047 | -2.19723 | -2.29521 |
| H | -4.17405 | -2.25298 | -2.06016 |
| C | -4.74682 | 0.57613  | -1.13237 |
| H | -4.80906 | 1.36101  | -0.38020 |

|   |          |          |          |
|---|----------|----------|----------|
| C | 0.29352  | 3.20346  | -1.53759 |
| C | 2.67249  | 3.06116  | -1.23191 |
| C | 0.36418  | 4.59160  | -1.46392 |
| H | -0.66477 | 2.71260  | -1.68961 |
| C | 2.74786  | 4.45076  | -1.15918 |
| H | 3.57299  | 2.46026  | -1.14036 |
| C | 1.59364  | 5.22007  | -1.27113 |
| H | -0.54028 | 5.18460  | -1.56341 |
| H | 3.71077  | 4.93131  | -1.01631 |
| H | 1.65047  | 6.30246  | -1.21424 |
| C | 1.55260  | 0.72874  | 1.00930  |
| O | 1.09813  | 0.95047  | 2.11428  |
| O | 2.85285  | 0.76385  | 0.74169  |
| C | 3.73700  | 0.96650  | 1.85428  |
| C | 5.12466  | 0.60777  | 1.37250  |
| H | 3.41009  | 0.32697  | 2.67762  |
| H | 3.65927  | 2.01021  | 2.17527  |
| H | 5.84465  | 0.71525  | 2.18676  |
| H | 5.13552  | -0.42601 | 1.02116  |
| H | 5.43139  | 1.25846  | 0.54982  |
| P | -1.56511 | 0.88061  | 1.35495  |
| C | -1.22969 | 2.55459  | 2.02317  |
| H | -2.15831 | 2.96591  | 2.42475  |
| H | -0.47130 | 2.49860  | 2.80087  |
| H | -0.86042 | 3.19040  | 1.21462  |
| C | -1.61117 | -0.20418 | 2.82398  |
| H | -0.62865 | -0.18448 | 3.29279  |
| H | -2.37348 | 0.15910  | 3.51856  |
| H | -1.83649 | -1.22539 | 2.51034  |
| C | -3.30531 | 1.01087  | 0.82442  |
| C | -4.25728 | 0.04710  | 1.15835  |
| C | -3.67576 | 2.09752  | 0.02370  |
| C | -5.56620 | 0.16767  | 0.69492  |
| H | -3.98197 | -0.80859 | 1.76649  |
| C | -4.98214 | 2.21729  | -0.43545 |
| H | -2.93602 | 2.84726  | -0.24829 |
| C | -5.92861 | 1.25028  | -0.10040 |
| H | -6.30067 | -0.58779 | 0.95478  |
| H | -5.26201 | 3.06256  | -1.05539 |
| H | -6.94790 | 1.34166  | -0.46126 |
| C | -2.80655 | -2.89784 | -2.29503 |
| C | -3.28584 | -3.00218 | -0.92894 |
| C | -2.50091 | -2.96831 | 0.17088  |
| C | -1.68054 | -2.27645 | -2.67381 |

|                                                                                     |          |          |          |                                                                                      |          |          |          |
|-------------------------------------------------------------------------------------|----------|----------|----------|--------------------------------------------------------------------------------------|----------|----------|----------|
| H                                                                                   | -4.80732 | 1.03378  | -2.12128 | C                                                                                    | -1.06174 | -2.78554 | 0.27424  |
| H                                                                                   | -5.56193 | -0.13926 | -1.00211 | C                                                                                    | -0.79654 | -1.42593 | -1.79286 |
| C                                                                                   | -3.14330 | -1.08860 | 0.63410  | C                                                                                    | -0.22649 | -2.16311 | -0.59874 |
| C                                                                                   | -2.65200 | -2.38596 | 0.80822  | H                                                                                    | -4.34163 | -3.22286 | -0.78967 |
| C                                                                                   | -3.64119 | -0.37158 | 1.72730  | H                                                                                    | -2.98990 | -3.17681 | 1.12261  |
| C                                                                                   | -2.67234 | -2.96248 | 2.07438  | H                                                                                    | -0.65261 | -3.18053 | 1.19662  |
| H                                                                                   | -2.22860 | -2.92469 | -0.03151 | H                                                                                    | -1.37829 | -2.35927 | -3.71544 |
| C                                                                                   | -3.65276 | -0.95416 | 2.98892  | H                                                                                    | -3.39860 | -3.40293 | -3.05572 |
| H                                                                                   | -4.00499 | 0.64412  | 1.60132  | H                                                                                    | 0.03164  | -1.12746 | -2.42421 |
| C                                                                                   | -3.17190 | -2.25040 | 3.16133  | C                                                                                    | 1.15808  | -1.75774 | -0.24353 |
| H                                                                                   | -2.28959 | -3.96812 | 2.21095  | C                                                                                    | 1.59942  | -2.23017 | 1.12460  |
| H                                                                                   | -4.03467 | -0.39559 | 3.83668  | F                                                                                    | 0.81599  | -1.74283 | 2.10689  |
| H                                                                                   | -3.18188 | -2.70371 | 4.14727  | F                                                                                    | 1.58012  | -3.57365 | 1.27056  |
| O                                                                                   | 3.58988  | 3.77245  | 1.49622  | F                                                                                    | 2.85611  | -1.85293 | 1.43121  |
| H                                                                                   | 2.84982  | 3.14336  | 1.50865  | C                                                                                    | 2.25636  | -2.10011 | -1.22535 |
| C                                                                                   | 3.79132  | 4.09624  | 0.13953  | F                                                                                    | 3.38803  | -1.40145 | -1.01049 |
| H                                                                                   | 2.92355  | 4.60443  | -0.30181 | F                                                                                    | 2.61383  | -3.40205 | -1.15002 |
| H                                                                                   | 4.65012  | 4.76961  | 0.07844  | F                                                                                    | 1.93054  | -1.88605 | -2.51286 |
| H                                                                                   | 4.01043  | 3.20887  | -0.47159 | TS1d'                                                                                |          |          |          |
| C                                                                                   | 7.11333  | -1.51426 | 0.23632  | 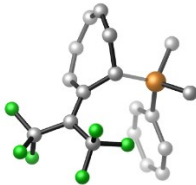 |          |          |          |
| H                                                                                   | 8.13114  | -1.11631 | 0.22376  |                                                                                      |          |          |          |
| H                                                                                   | 6.61279  | -1.14083 | 1.14052  |                                                                                      |          |          |          |
| H                                                                                   | 7.17525  | -2.60832 | 0.31070  |                                                                                      |          |          |          |
| O                                                                                   | 6.46923  | -1.09257 | -0.94382 |                                                                                      |          |          |          |
| H                                                                                   | 5.56105  | -1.43157 | -0.88887 |                                                                                      |          |          |          |
| <b>M1'-2sol-1</b>                                                                   |          |          |          |                                                                                      |          |          |          |
|  |          |          |          | C                                                                                    | 1.01637  | 3.57306  | -0.14793 |
| C                                                                                   | 4.99816  | 0.00144  | -0.43791 | C                                                                                    | 1.30367  | 3.12806  | -1.46892 |
| C                                                                                   | 5.00706  | -1.41078 | -0.77836 | C                                                                                    | 0.68589  | 2.05810  | -2.08564 |
| C                                                                                   | 3.97965  | -2.09840 | -1.32285 | C                                                                                    | 0.47409  | 2.83652  | 0.85605  |
| C                                                                                   | 3.93195  | 0.78325  | -0.20958 | C                                                                                    | -0.27725 | 1.14519  | -1.60987 |
| C                                                                                   | 2.63739  | -1.64885 | -1.64308 | C                                                                                    | 0.26529  | 1.35498  | 0.83817  |
| C                                                                                   | 2.48409  | 0.37427  | -0.13085 | C                                                                                    | -0.64595 | 0.86646  | -0.29083 |
| C                                                                                   | 1.93801  | -0.59373 | -1.16568 | H                                                                                    | 1.93959  | 3.75929  | -2.08262 |
| H                                                                                   | 5.95680  | -1.92603 | -0.66368 | H                                                                                    | 0.91949  | 1.93878  | -3.14414 |
| H                                                                                   | 4.18060  | -3.13130 | -1.59982 | H                                                                                    | -0.78150 | 0.55907  | -2.37149 |
| H                                                                                   | 2.08103  | -2.31192 | -2.29846 | H                                                                                    | 0.17704  | 3.33622  | 1.77294  |
| H                                                                                   | 4.11112  | 1.84112  | -0.03386 | H                                                                                    | 1.22314  | 4.61982  | 0.07224  |
| H                                                                                   | 5.97381  | 0.48254  | -0.40047 | H                                                                                    | -0.18791 | 1.09175  | 1.79504  |
| H                                                                                   | 1.88846  | 1.28978  | -0.21142 | C                                                                                    | -1.77372 | 0.12240  | 0.06438  |
|                                                                                     |          |          |          | P                                                                                    | 1.86808  | 0.39961  | 0.92492  |
|                                                                                     |          |          |          | C                                                                                    | 2.09150  | -0.02959 | 2.67215  |
|                                                                                     |          |          |          | H                                                                                    | 2.13907  | 0.90571  | 3.23636  |
|                                                                                     |          |          |          | H                                                                                    | 1.23819  | -0.61127 | 3.02280  |
|                                                                                     |          |          |          | H                                                                                    | 3.01924  | -0.58702 | 2.81385  |

|   |          |          |          |                                                                                      |          |          |          |
|---|----------|----------|----------|--------------------------------------------------------------------------------------|----------|----------|----------|
| C | 0.48552  | -0.49031 | -1.39644 | C                                                                                    | 3.32977  | 1.38163  | 0.49423  |
| C | -0.31795 | -1.64870 | -1.14598 | H                                                                                    | 3.31758  | 1.63696  | -0.56413 |
| C | -0.11588 | 0.77847  | -1.56089 | H                                                                                    | 3.31422  | 2.30446  | 1.07588  |
| C | -2.33353 | -0.23457 | -1.33170 | H                                                                                    | 4.21491  | 0.79110  | 0.74074  |
| O | -3.56087 | -0.12058 | -1.25362 | C                                                                                    | 1.92103  | -1.10726 | -0.06591 |
| O | 0.09752  | -2.77319 | -0.84138 | C                                                                                    | 1.71255  | -2.35755 | 0.52433  |
| O | 0.50650  | 1.85815  | -1.68553 | C                                                                                    | 2.19108  | -1.01359 | -1.43601 |
| N | -1.51969 | 0.84470  | -1.57078 | C                                                                                    | 1.78065  | -3.50828 | -0.25379 |
| N | -1.72121 | -1.45337 | -1.19356 | H                                                                                    | 1.48959  | -2.43898 | 1.58265  |
| C | -2.13688 | 2.15655  | -1.74404 | C                                                                                    | 2.25360  | -2.16885 | -2.20703 |
| H | -3.19197 | 2.00782  | -1.95520 | H                                                                                    | 2.33822  | -0.04424 | -1.90172 |
| H | -2.01349 | 2.75674  | -0.83765 | C                                                                                    | 2.04853  | -3.41363 | -1.61700 |
| H | -1.64207 | 2.66550  | -2.57130 | H                                                                                    | 1.61927  | -4.47736 | 0.20553  |
| C | -2.60507 | -2.58450 | -0.92568 | H                                                                                    | 2.45844  | -2.09505 | -3.26950 |
| H | -3.34709 | -2.65994 | -1.72243 | H                                                                                    | 2.09442  | -4.31310 | -2.22215 |
| H | -1.98825 | -3.47719 | -0.88783 | C                                                                                    | -2.91614 | -0.03215 | -0.86782 |
| H | -3.12811 | -2.43893 | 0.02395  | F                                                                                    | -3.08090 | 1.04008  | -1.66478 |
| P | 1.97909  | -0.27185 | 1.53306  | F                                                                                    | -2.81258 | -1.09224 | -1.71455 |
| C | 2.96964  | 0.55928  | 2.80112  | F                                                                                    | -4.09048 | -0.20244 | -0.22253 |
| H | 4.02586  | 0.34682  | 2.62353  | C                                                                                    | -1.86221 | -0.59968 | 1.34662  |
| H | 2.80442  | 1.63741  | 2.74060  | F                                                                                    | -2.70495 | -1.64121 | 1.32159  |
| H | 2.67139  | 0.20147  | 3.78817  | F                                                                                    | -0.64961 | -1.12332 | 1.73756  |
| C | 2.23326  | -2.05361 | 1.64365  | F                                                                                    | -2.23334 | 0.15410  | 2.41967  |
| H | 1.61988  | -2.53943 | 0.87496  | M1d'                                                                                 |          |          |          |
| H | 3.28792  | -2.25936 | 1.44689  | 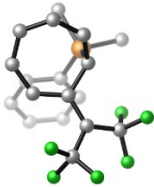 |          |          |          |
| H | 1.95938  | -2.40342 | 2.64148  | C                                                                                    | 1.01637  | 3.57306  | -0.14793 |
| C | 0.23927  | 0.11243  | 1.79545  | C                                                                                    | 1.30367  | 3.12806  | -1.46892 |
| C | -0.16060 | 1.45163  | 1.71202  | C                                                                                    | 0.68589  | 2.05810  | -2.08564 |
| C | -0.70850 | -0.90047 | 1.97357  | C                                                                                    | 0.47409  | 2.83652  | 0.85605  |
| C | -1.51139 | 1.77271  | 1.79202  | C                                                                                    | -0.27725 | 1.14519  | -1.60987 |
| H | 0.55545  | 2.25372  | 1.54825  | C                                                                                    | 0.26529  | 1.35498  | 0.83817  |
| C | -2.05733 | -0.56772 | 2.06485  | C                                                                                    | -0.64595 | 0.86646  | -0.29083 |
| H | -0.40854 | -1.94405 | 1.99666  | H                                                                                    | 1.93959  | 3.75929  | -2.08262 |
| C | -2.45895 | 0.76337  | 1.96292  | H                                                                                    | 0.91949  | 1.93878  | -3.14414 |
| H | -1.80573 | 2.81209  | 1.69382  | H                                                                                    | -0.78150 | 0.55907  | -2.37149 |
| H | -2.81136 | -1.33832 | 2.18245  | H                                                                                    | 0.17704  | 3.33622  | 1.77294  |
| H | -3.51847 | 0.99660  | 2.00300  | H                                                                                    | 1.22314  | 4.61982  | 0.07224  |
| C | -0.15341 | 5.09624  | -0.75896 | H                                                                                    | -0.18791 | 1.09175  | 1.79504  |
| H | -0.32105 | 5.94486  | -0.09081 | C                                                                                    | -1.77372 | 0.12240  | 0.06438  |
| H | 0.74567  | 5.30137  | -1.35423 |                                                                                      |          |          |          |
| H | -1.00941 | 5.03093  | -1.44548 |                                                                                      |          |          |          |
| O | -0.01789 | 3.93691  | 0.03170  |                                                                                      |          |          |          |
| H | 0.14335  | 3.18997  | -0.58087 |                                                                                      |          |          |          |
| C | -5.96916 | -1.72281 | 0.46278  |                                                                                      |          |          |          |

|                                                                                   |          |          |          |                                                                                      |          |          |          |
|-----------------------------------------------------------------------------------|----------|----------|----------|--------------------------------------------------------------------------------------|----------|----------|----------|
| H                                                                                 | -6.50757 | -2.22233 | 1.27167  | P                                                                                    | 1.86808  | 0.39961  | 0.92492  |
| H                                                                                 | -5.63773 | -2.48807 | -0.25258 | C                                                                                    | 2.09150  | -0.02959 | 2.67215  |
| H                                                                                 | -6.66845 | -1.05273 | -0.05346 | H                                                                                    | 2.13907  | 0.90571  | 3.23636  |
| O                                                                                 | -4.88277 | -1.02385 | 1.03026  | H                                                                                    | 1.23819  | -0.61127 | 3.02280  |
| H                                                                                 | -4.39756 | -0.61817 | 0.28891  | H                                                                                    | 3.01924  | -0.58702 | 2.81385  |
| <b>M1'-2sol-2</b>                                                                 |          |          |          | C                                                                                    | 3.32977  | 1.38163  | 0.49423  |
| 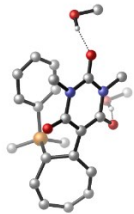 |          |          |          | H                                                                                    | 3.31758  | 1.63696  | -0.56413 |
| C                                                                                 | -5.09980 | -0.50679 | -0.29127 | H                                                                                    | 3.31422  | 2.30446  | 1.07588  |
| C                                                                                 | -5.09070 | 0.89867  | -0.65581 | H                                                                                    | 4.21491  | 0.79110  | 0.74074  |
| C                                                                                 | -4.08577 | 1.54252  | -1.28822 | C                                                                                    | 1.92103  | -1.10726 | -0.06591 |
| C                                                                                 | -4.04340 | -1.31886 | -0.13345 | C                                                                                    | 1.71255  | -2.35755 | 0.52433  |
| C                                                                                 | -2.78245 | 1.05152  | -1.69491 | C                                                                                    | 2.19108  | -1.01359 | -1.43601 |
| C                                                                                 | -2.58118 | -0.96183 | -0.17216 | C                                                                                    | 1.78065  | -3.50828 | -0.25379 |
| C                                                                                 | -2.07508 | -0.01120 | -1.24375 | H                                                                                    | 1.48959  | -2.43898 | 1.58265  |
| H                                                                                 | -6.01256 | 1.44655  | -0.48102 | C                                                                                    | 2.25360  | -2.16885 | -2.20703 |
| H                                                                                 | -4.27624 | 2.57612  | -1.57032 | H                                                                                    | 2.33822  | -0.04424 | -1.90172 |
| H                                                                                 | -2.25715 | 1.69200  | -2.39527 | C                                                                                    | 2.04853  | -3.41363 | -1.61700 |
| H                                                                                 | -4.24382 | -2.36665 | 0.07742  | H                                                                                    | 1.61927  | -4.47736 | 0.20553  |
| H                                                                                 | -6.08380 | -0.95562 | -0.16871 | H                                                                                    | 2.45844  | -2.09505 | -3.26950 |
| H                                                                                 | -2.02766 | -1.89797 | -0.30246 | H                                                                                    | 2.09442  | -4.31310 | -2.22215 |
| C                                                                                 | -0.63750 | -0.14481 | -1.53501 | C                                                                                    | -2.91614 | -0.03215 | -0.86782 |
| C                                                                                 | 0.18890  | 1.00448  | -1.42906 | F                                                                                    | -3.08090 | 1.04008  | -1.66478 |
| C                                                                                 | -0.04681 | -1.44320 | -1.63897 | F                                                                                    | -2.81258 | -1.09224 | -1.71455 |
| C                                                                                 | 2.19451  | -0.42846 | -1.51210 | F                                                                                    | -4.09048 | -0.20244 | -0.22253 |
| O                                                                                 | 3.42197  | -0.54050 | -1.45818 | C                                                                                    | -1.86221 | -0.59968 | 1.34662  |
| O                                                                                 | -0.20288 | 2.17990  | -1.25193 | F                                                                                    | -2.70495 | -1.64121 | 1.32159  |
| O                                                                                 | -0.66161 | -2.51328 | -1.70897 | F                                                                                    | -0.64961 | -1.12332 | 1.73756  |
| N                                                                                 | 1.36368  | -1.51244 | -1.63015 | F                                                                                    | -2.23334 | 0.15410  | 2.41967  |
| N                                                                                 | 1.58390  | 0.80395  | -1.47113 | <b>TS2d'</b>                                                                         |          |          |          |
| C                                                                                 | 1.94944  | -2.84466 | -1.73470 |  |          |          |          |
| H                                                                                 | 3.02553  | -2.75290 | -1.61856 | C                                                                                    | -2.74126 | 0.76431  | 2.17356  |
| H                                                                                 | 1.52849  | -3.48278 | -0.95729 | C                                                                                    | -3.55295 | -0.42386 | 2.18500  |
| H                                                                                 | 1.70655  | -3.27830 | -2.70672 | C                                                                                    | -3.13561 | -1.66071 | 1.79150  |
| C                                                                                 | 2.44038  | 1.97375  | -1.29704 | C                                                                                    | -1.72361 | 1.00115  | 1.32234  |
| H                                                                                 | 3.43117  | 1.73335  | -1.67352 | C                                                                                    | -1.84491 | -2.05133 | 1.29101  |
| H                                                                                 | 2.00440  | 2.80466  | -1.84938 | C                                                                                    | -1.37703 | 0.11917  | 0.15918  |
| H                                                                                 | 2.49822  | 2.24599  | -0.23702 | C                                                                                    | -0.94776 | -1.27455 | 0.61497  |
| P                                                                                 | -1.92028 | -0.34409 | 1.44915  | H                                                                                    | -4.53566 | -0.34489 | 2.64272  |
| C                                                                                 | -2.88486 | -1.08416 | 2.79274  | H                                                                                    | -3.82364 | -2.48354 | 1.97756  |

|   |          |          |          |   |          |          |          |
|---|----------|----------|----------|---|----------|----------|----------|
| H | -3.93478 | -0.81177 | 2.66708  | H | -1.57441 | -3.08691 | 1.47118  |
| H | -2.79126 | -2.17181 | 2.75920  | H | -1.08768 | 1.87054  | 1.46560  |
| H | -2.51068 | -0.71689 | 3.75009  | H | -2.96131 | 1.51953  | 2.92498  |
| C | -2.04644 | 1.45106  | 1.55798  | H | -0.53190 | 0.56971  | -0.35924 |
| H | -1.52716 | 1.90295  | 0.70709  | C | 0.43785  | -1.65435 | 0.31749  |
| H | -3.10528 | 1.71788  | 1.51297  | P | -2.67100 | 0.11259  | -1.17749 |
| H | -1.60157 | 1.80228  | 2.49135  | C | -2.84959 | -1.52133 | -1.92657 |
| C | -0.19976 | -0.85401 | 1.62178  | H | -1.88200 | -1.82584 | -2.32796 |
| C | 0.09927  | -2.22241 | 1.63102  | H | -3.15008 | -2.24359 | -1.16537 |
| C | 0.82636  | 0.09680  | 1.65949  | H | -3.59111 | -1.46724 | -2.72646 |
| C | 1.42568  | -2.63614 | 1.68865  | C | -2.04991 | 1.24684  | -2.44844 |
| H | -0.69180 | -2.96645 | 1.57569  | H | -1.87169 | 2.22944  | -2.00527 |
| C | 2.15022  | -0.33218 | 1.70019  | H | -1.10673 | 0.85668  | -2.83543 |
| H | 0.61397  | 1.16382  | 1.63137  | H | -2.78150 | 1.33911  | -3.25304 |
| C | 2.45134  | -1.69255 | 1.71282  | C | -4.30244 | 0.72313  | -0.70400 |
| H | 1.65738  | -3.69621 | 1.69864  | C | -5.39273 | -0.14813 | -0.63122 |
| H | 2.96204  | 0.38843  | 1.70348  | C | -4.46856 | 2.08094  | -0.41308 |
| H | 3.49181  | -1.99932 | 1.73576  | C | -6.64384 | 0.33937  | -0.27058 |
| O | 0.61246  | 3.30045  | 1.08589  | H | -5.26901 | -1.20623 | -0.83936 |
| H | 0.36265  | 3.01719  | 0.18184  | C | -5.72108 | 2.56046  | -0.04497 |
| C | 1.21300  | 4.57360  | 1.01045  | H | -3.62607 | 2.76474  | -0.45671 |
| H | 0.53212  | 5.32859  | 0.59753  | C | -6.80677 | 1.69095  | 0.02561  |
| H | 1.48609  | 4.87867  | 2.02350  | H | -7.48962 | -0.33734 | -0.21678 |
| H | 2.12765  | 4.56685  | 0.40097  | H | -5.84795 | 3.61263  | 0.18527  |
| C | 5.59675  | 0.81945  | 0.53001  | H | -7.78312 | 2.06797  | 0.31162  |
| H | 6.35857  | 1.02715  | 1.28552  | C | 1.38679  | 0.14818  | 2.14680  |
| H | 4.80472  | 1.57692  | 0.62981  | C | 1.67466  | -0.00308 | 0.86523  |
| H | 6.05407  | 0.93685  | -0.46089 | H | 0.64672  | -0.44191 | 2.67389  |
| O | 5.11801  | -0.48826 | 0.74381  | H | 1.93533  | 0.90460  | 2.70385  |
| H | 4.51334  | -0.67874 | 0.00635  | C | 2.36738  | 0.59767  | -0.15538 |



## M1'-3sol

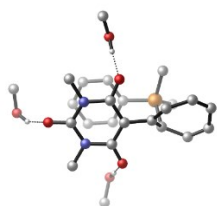

|   |          |          |          |
|---|----------|----------|----------|
| C | 5.00605  | 0.84911  | -0.39734 |
| C | 5.16130  | -0.49598 | -0.92428 |
| C | 4.21196  | -1.20194 | -1.57599 |
| C | 3.86282  | 1.46866  | -0.06772 |
| C | 2.83467  | -0.84121 | -1.86046 |
| C | 2.47279  | 0.88737  | -0.05198 |
| C | 2.03199  | 0.05419  | -1.24259 |
| H | 6.15797  | -0.92465 | -0.86320 |
| H | 4.51706  | -2.16142 | -1.98857 |
| H | 2.35691  | -1.43822 | -2.63129 |
| H | 3.92216  | 2.50819  | 0.24469  |
| H | 5.92412  | 1.42469  | -0.29568 |
| H | 1.77927  | 1.73235  | 0.01249  |
| C | 0.58007  | 0.07113  | -1.50685 |
| C | -0.12777 | -1.15978 | -1.45037 |
| C | -0.12920 | 1.29628  | -1.50388 |
| C | -2.25641 | 0.07280  | -1.46244 |
| O | -3.48555 | 0.07708  | -1.39457 |
| O | 0.38699  | -2.29129 | -1.32954 |
| O | 0.40059  | 2.42755  | -1.44828 |
| N | -1.53264 | 1.23739  | -1.55040 |
| N | -1.53220 | -1.09712 | -1.47984 |
| C | -2.27400 | 2.49536  | -1.58616 |
| H | -3.25326 | 2.30485  | -2.01764 |
| H | -2.38121 | 2.90921  | -0.57902 |
| H | -1.71219 | 3.19928  | -2.19873 |
| C | -2.26160 | -2.35940 | -1.38291 |
| H | -3.30881 | -2.16085 | -1.59370 |
| H | -1.84690 | -3.05967 | -2.10830 |
| H | -2.14978 | -2.78567 | -0.38118 |
| P | 2.06940  | -0.06079 | 1.48910  |
| C | 2.95455  | 0.70351  | 2.87274  |
| H | 4.02771  | 0.67522  | 2.67284  |
| H | 2.63321  | 1.74300  | 2.97311  |
| H | 2.72560  | 0.16310  | 3.79297  |
| C | 2.54016  | -1.79761 | 1.35247  |
| H | 1.98478  | -2.24397 | 0.52032  |

|   |          |          |          |
|---|----------|----------|----------|
| C | 3.59359  | 0.06203  | -0.69065 |
| O | 4.20236  | 0.52139  | -1.65160 |
| O | 4.04582  | -1.02690 | -0.01977 |
| C | 5.15502  | -1.69173 | -0.61639 |
| C | 5.39016  | -2.96601 | 0.16635  |
| H | 6.03130  | -1.03460 | -0.59823 |
| H | 4.92737  | -1.90054 | -1.66731 |
| H | 6.24773  | -3.50701 | -0.24198 |
| H | 5.58884  | -2.73887 | 1.21662  |
| H | 4.50884  | -3.60820 | 0.11584  |
| C | 0.95192  | -2.83515 | 1.08880  |
| C | 0.71294  | -1.82285 | -1.14173 |
| F | 1.98640  | -2.08133 | -1.43601 |
| F | 0.35641  | -0.72196 | -1.86281 |
| F | -0.00431 | -2.83668 | -1.70818 |
| F | 0.40639  | -4.02124 | 0.69121  |
| F | 2.27492  | -2.99547 | 0.97426  |
| F | 0.68050  | -2.73852 | 2.40297  |

|   |          |          |          |
|---|----------|----------|----------|
| H | 3.61167  | -1.85617 | 1.15042  |
| H | 2.30059  | -2.31620 | 2.28345  |
| C | 0.29447  | 0.05195  | 1.76702  |
| C | -0.30279 | 1.31872  | 1.78618  |
| C | -0.48744 | -1.10336 | 1.85019  |
| C | -1.68662 | 1.42311  | 1.85799  |
| H | 0.28264  | 2.23281  | 1.71655  |
| C | -1.87290 | -0.98260 | 1.93194  |
| H | -0.04761 | -2.09541 | 1.82192  |
| C | -2.47751 | 0.27332  | 1.92017  |
| H | -2.13274 | 2.41197  | 1.84373  |
| H | -2.47527 | -1.88403 | 1.99085  |
| H | -3.56067 | 0.36120  | 1.93348  |
| O | -0.24630 | -3.96294 | 0.72453  |
| H | -0.05562 | -3.40093 | -0.05449 |
| C | -0.49848 | -5.27057 | 0.26211  |
| H | 0.36346  | -5.69843 | -0.26597 |
| H | -0.71430 | -5.90047 | 1.12865  |
| H | -1.36652 | -5.31112 | -0.41060 |
| C | -0.77420 | 5.35212  | 0.05474  |
| H | -1.08297 | 5.99342  | 0.88381  |
| H | 0.09717  | 5.81221  | -0.42871 |
| H | -1.59512 | 5.32376  | -0.67579 |
| O | -0.48396 | 4.07475  | 0.57602  |
| H | -0.18807 | 3.51330  | -0.16890 |
| C | -5.51158 | -1.11631 | 0.55869  |
| H | -6.22056 | -1.42236 | 1.33210  |
| H | -4.54627 | -1.60432 | 0.75992  |
| H | -5.87561 | -1.48251 | -0.41006 |
| O | -5.41260 | 0.28919  | 0.59402  |
| H | -4.77339 | 0.51990  | -0.09918 |

M2d'

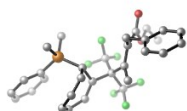

|   |         |          |          |
|---|---------|----------|----------|
| C | 1.91241 | -2.88225 | 1.36528  |
| C | 3.02762 | -2.13744 | 1.91776  |
| C | 3.05536 | -0.79847 | 2.10378  |
| C | 1.00201 | -2.41780 | 0.49343  |
| C | 1.99775 | 0.14770  | 1.80385  |
| C | 1.06618 | -1.06737 | -0.18157 |

|   |          |          |          |
|---|----------|----------|----------|
| C | 1.03987  | 0.03996  | 0.85982  |
| H | 3.86119  | -2.71824 | 2.30373  |
| H | 3.91761  | -0.38346 | 2.62034  |
| H | 1.97634  | 1.01410  | 2.45600  |
| H | 0.13608  | -3.02654 | 0.25031  |
| H | 1.78067  | -3.89746 | 1.73280  |
| H | 0.17335  | -0.95642 | -0.81761 |
| C | -0.17977 | 0.97800  | 0.75895  |
| P | 2.42360  | -1.02618 | -1.45100 |
| C | 2.05286  | 0.14495  | -2.78053 |
| H | 1.04842  | -0.04029 | -3.16513 |
| H | 2.10930  | 1.17030  | -2.41888 |
| H | 2.79408  | -0.01209 | -3.56760 |
| C | 2.41973  | -2.66466 | -2.21868 |
| H | 2.64812  | -3.43332 | -1.48017 |
| H | 1.41921  | -2.84797 | -2.61994 |
| H | 3.14681  | -2.68711 | -3.03267 |
| C | 4.08312  | -0.64338 | -0.86781 |
| C | 4.38421  | 0.67161  | -0.49543 |
| C | 5.04888  | -1.64809 | -0.76239 |
| C | 5.64834  | 0.96941  | 0.00139  |
| H | 3.63424  | 1.45270  | -0.56447 |
| C | 6.31186  | -1.33893 | -0.26958 |
| H | 4.82104  | -2.66999 | -1.04788 |
| C | 6.60835  | -0.03409 | 0.11798  |
| H | 5.88237  | 1.98586  | 0.29805  |
| H | 7.06232  | -2.11728 | -0.18619 |
| H | 7.59279  | 0.20290  | 0.50739  |
| C | -1.54689 | -0.84582 | 1.68393  |
| C | -1.43403 | 0.01315  | 0.64279  |
| H | -0.83649 | -0.89488 | 2.49912  |
| H | -2.37801 | -1.54098 | 1.70767  |
| C | -2.19382 | -0.16528 | -0.57521 |
| C | -2.61144 | -1.56069 | -0.98641 |
| H | -2.74274 | -1.54998 | -2.07558 |
| H | -1.80973 | -2.27816 | -0.75373 |
| C | -3.90000 | -2.09949 | -0.38441 |
| C | -3.92390 | -3.27515 | 0.36732  |
| C | -5.10473 | -1.41517 | -0.58815 |
| C | -5.11317 | -3.75957 | 0.91205  |
| H | -2.99254 | -3.81302 | 0.53697  |
| C | -6.29325 | -1.89685 | -0.05074 |
| H | -5.08943 | -0.50609 | -1.18322 |
| C | -6.30350 | -3.07086 | 0.70384  |

|       |          |          |          |
|-------|----------|----------|----------|
| H     | -5.10725 | -4.67290 | 1.49994  |
| H     | -7.21936 | -1.35534 | -0.22041 |
| H     | -7.23230 | -3.44293 | 1.12508  |
| C     | -2.78641 | 0.88805  | -1.29938 |
| O     | -3.40315 | 0.82274  | -2.37111 |
| O     | -2.65008 | 2.10440  | -0.65518 |
| C     | -3.01673 | 3.25791  | -1.39505 |
| C     | -3.23692 | 4.38557  | -0.40536 |
| H     | -3.91905 | 3.04634  | -1.97316 |
| H     | -2.21686 | 3.50690  | -2.10666 |
| H     | -3.51331 | 5.30512  | -0.92844 |
| H     | -4.04027 | 4.12335  | 0.28753  |
| H     | -2.33273 | 4.57023  | 0.17806  |
| C     | 0.14592  | 1.96700  | -0.40472 |
| C     | -0.33836 | 1.87928  | 2.00188  |
| F     | -0.15737 | 1.49656  | -1.61512 |
| F     | -0.37534 | 3.18322  | -0.27997 |
| F     | 1.49694  | 2.18223  | -0.44307 |
| F     | 0.65095  | 2.80300  | 2.06252  |
| F     | -1.49151 | 2.53875  | 1.97459  |
| F     | -0.28269 | 1.20901  | 3.15684  |
| TS3d' |          |          |          |
| C     | -1.47098 | -0.12615 | -1.26886 |
| C     | -0.68329 | 0.44300  | -0.08698 |
| H     | -1.55638 | 0.58158  | -2.10964 |
| H     | -2.49231 | -0.37287 | -0.97608 |
| C     | 0.72924  | 0.36187  | -0.19291 |
| C     | 1.36373  | 0.90531  | -1.48837 |
| H     | 2.36079  | 0.49536  | -1.63864 |
| H     | 0.74944  | 0.63337  | -2.34657 |
| C     | 1.44658  | 2.41950  | -1.41902 |
| C     | 0.29352  | 3.20346  | -1.53759 |
| C     | 2.67249  | 3.06116  | -1.23191 |
| C     | 0.36418  | 4.59160  | -1.46392 |
| H     | -0.66477 | 2.71260  | -1.68961 |
| C     | 2.74786  | 4.45076  | -1.15918 |
| H     | 3.57299  | 2.46026  | -1.14036 |
| C     | 1.59364  | 5.22007  | -1.27113 |
| H     | -0.54028 | 5.18460  | -1.56341 |
| H     | 3.71077  | 4.93131  | -1.01631 |
| H     | 1.65047  | 6.30246  | -1.21424 |
| C     | 1.55260  | 0.72874  | 1.00930  |
| O     | 1.09813  | 0.95047  | 2.11428  |

|   |          |          |          |
|---|----------|----------|----------|
| O | 2.85285  | 0.76385  | 0.74169  |
| C | 3.73700  | 0.96650  | 1.85428  |
| C | 5.12466  | 0.60777  | 1.37250  |
| H | 3.41009  | 0.32697  | 2.67762  |
| H | 3.65927  | 2.01021  | 2.17527  |
| H | 5.84465  | 0.71525  | 2.18676  |
| H | 5.13552  | -0.42601 | 1.02116  |
| H | 5.43139  | 1.25846  | 0.54982  |
| P | -1.56511 | 0.88061  | 1.35495  |
| C | -1.22969 | 2.55459  | 2.02317  |
| H | -2.15831 | 2.96591  | 2.42475  |
| H | -0.47130 | 2.49860  | 2.80087  |
| H | -0.86042 | 3.19040  | 1.21462  |
| C | -1.61117 | -0.20418 | 2.82398  |
| H | -0.62865 | -0.18448 | 3.29279  |
| H | -2.37348 | 0.15910  | 3.51856  |
| H | -1.83649 | -1.22539 | 2.51034  |
| C | -3.30531 | 1.01087  | 0.82442  |
| C | -4.25728 | 0.04710  | 1.15835  |
| C | -3.67576 | 2.09752  | 0.02370  |
| C | -5.56620 | 0.16767  | 0.69492  |
| H | -3.98197 | -0.80859 | 1.76649  |
| C | -4.98214 | 2.21729  | -0.43545 |
| H | -2.93602 | 2.84726  | -0.24829 |
| C | -5.92861 | 1.25028  | -0.10040 |
| H | -6.30067 | -0.58779 | 0.95478  |
| H | -5.26201 | 3.06256  | -1.05539 |
| H | -6.94790 | 1.34166  | -0.46126 |
| C | -2.80655 | -2.89784 | -2.29503 |
| C | -3.28584 | -3.00218 | -0.92894 |
| C | -2.50091 | -2.96831 | 0.17088  |
| C | -1.68054 | -2.27645 | -2.67381 |
| C | -1.06174 | -2.78554 | 0.27424  |
| C | -0.79654 | -1.42593 | -1.79286 |
| C | -0.22649 | -2.16311 | -0.59874 |
| H | -4.34163 | -3.22286 | -0.78967 |
| H | -2.98990 | -3.17681 | 1.12261  |
| H | -0.65261 | -3.18053 | 1.19662  |
| H | -1.37829 | -2.35927 | -3.71544 |
| H | -3.39860 | -3.40293 | -3.05572 |
| H | 0.03164  | -1.12746 | -2.42421 |
| C | 1.15808  | -1.75774 | -0.24353 |
| C | 1.59942  | -2.23017 | 1.12460  |
| F | 0.81599  | -1.74283 | 2.10689  |

|          |                |                 |                 |
|----------|----------------|-----------------|-----------------|
| <b>F</b> | <b>1.58012</b> | <b>-3.57365</b> | <b>1.27056</b>  |
| <b>F</b> | <b>2.85611</b> | <b>-1.85293</b> | <b>1.43121</b>  |
| <b>C</b> | <b>2.25636</b> | <b>-2.10011</b> | <b>-1.22535</b> |
| <b>F</b> | <b>3.38803</b> | <b>-1.40145</b> | <b>-1.01049</b> |
| <b>F</b> | <b>2.61383</b> | <b>-3.40205</b> | <b>-1.15002</b> |
| <b>F</b> | <b>1.93054</b> | <b>-1.88605</b> | <b>-2.51286</b> |
